# Supplementary material for: Cell cycle-specific loading of condensin I is regulated by the N-terminal tail of its kleisin subunit
Source: eLife. 2022 Dec 13;11:e84694. doi: 10.7554/eLife.84694 (PMC9797191; doi:10.7554/eLife.84694)
Supplement: Figure 1—figure supplement 1—source data 2. [file elife-84694-fig1-figsupp1-data2.xlsx]

## Sheet: Supplementary figure 1
Figure 1-figure supplement 1-source data 2
Recombinant DNA constructs	SOURCE	IDENTIFIER
pFastBac Dual vector-mSMC2, GST-(3C)-mSMC4	Kinoshita et al., 2015	mSMC2, Q8CG48; mSMC4, Q8CG47
pFastBac1-hCAP-D2	Kinoshita et al., 2022	hCAP-D2, Q15021
pFastBac1-hCAP-G	Kinoshita et al., 2022	hCAP-G, P40121
pFastBac1-hCAP-H	Kinoshita et al., 2022	hCAP-H, Q15003
pFastBac1-hCAP-H (dN)	This paper	N/A
pFastBac1-hCAP-H (N19A)	This paper	N/A
pFastBac1-hCAP-H (N19D)	This paper	N/A
pFastBac1-hCAP-H (dCH)	This paper	N/A
pFastBac1-hCAP-H (crCH)	This paper	N/A
pFastBac1-hCAP-H-(TEV)-Halo	This paper	N/A
pFastBac1-hCAP-H (dN)-(TEV)-Halo	This paper	N/A
