# Supplementary material for: Cell cycle-specific loading of condensin I is regulated by the N-terminal tail of its kleisin subunit
Source: eLife. 2022 Dec 13;11:e84694. doi: 10.7554/eLife.84694 (PMC9797191; doi:10.7554/eLife.84694)
Supplement: Figure 1—figure supplement 2—source data 1. [file elife-84694-fig1-figsupp2-data1.xlsx]

## Sheet: 35nM holo(WT)
Figure 1-figure supplement 2-source data 1
Figure 1-figure supplement 2B
Non-normalized values
	35 nM holo(WT)_150 min
Chromosome sample		1		2		3		4		5		6		7		8		9		10		11		12		13		14		15		16		17		18		19		20
		DAPI	mSMC4	DAPI	mSMC4	DAPI	mSMC4	DAPI	mSMC4	DAPI	mSMC4	DAPI	mSMC4	DAPI	mSMC4	DAPI	mSMC4	DAPI	mSMC4	DAPI	mSMC4	DAPI	mSMC4	DAPI	mSMC4	DAPI	mSMC4	DAPI	mSMC4	DAPI	mSMC4	DAPI	mSMC4	DAPI	mSMC4	DAPI	mSMC4	DAPI	mSMC4	DAPI	mSMC4
Distance (µm)
-1.49351		19.908	32.224	82.963	36.147	2.648	25.26	17.603	29.947	1.304	21.089	0	0	0.613	0	0	0	0	7.882	11.065	33.461	0	17.062	0	8.622	0	22.951	74.645	57.611	0	0	0	37.741	8.191	12.801	0	9.387	30.208	15.453	0	0
-1.42857		31.435	28.347	31.653	7.136	13.637	0	0	17.198	0	0	23.077	43.851	0	17.773	16.877	21.948	34.998	2.433	5.267	35.081	4.429	16.312	39.017	0	43.599	15.068	122.577	86.06	35.929	36.244	7.191	33.913	0.894	16.334	2.397	27.697	35.841	23.054	45.675	23.879
-1.36364		25.462	22.085	0	0	0	34.659	48.552	14.415	6.744	21.617	36.01	22.607	9.755	7.922	33.114	10.796	76.639	24.084	0	37.679	8.531	31.406	27.415	40.768	30.073	42.995	193.209	70.238	75.724	26.43	3.886	0	2.218	0	36.52	14.066	0	10.113	31.294	39.317
-1.2987		28.714	58.204	24.045	15.465	25.264	44.848	49.146	0	14.256	43.49	63.957	18.057	32.205	33.702	24.043	18.366	97.993	25.308	39.471	44.399	10.578	0	66.144	30.867	49.051	27.088	156.376	62.768	79.374	21.02	28.535	32.552	0	15.888	47.722	27.455	67.029	20.16	33.951	44.958
-1.23377		38.088	70.153	67.314	66.562	35.369	43.237	46.94	22.401	24.552	32.53	90.619	29.838	49.682	33.814	29.273	24.235	99.732	37.966	80.946	80.497	67.437	10.218	76.022	29.248	76.618	28.913	181.449	75.328	91.867	49.803	39.949	20.767	17.416	32.121	41.002	0	36.907	24.243	47.416	72.629
-1.16883		50.136	47.469	107.583	61.947	44.588	36.958	77.272	24.736	33.906	48.712	70.328	19.69	54.479	6.388	90.292	26.645	120.963	52.637	108.654	59.833	115.992	47.484	50.406	42.073	42.617	8.717	233.296	89.681	127.087	61.273	55.445	30.96	28.797	66.749	64.3	23.18	104.074	6.04	70.651	77.34
-1.1039		48.966	65.044	110.198	49.098	60.08	31.729	97.204	42.194	51.719	80.25	124.104	29.791	105.454	39.506	142.374	12.763	201.792	30.849	113.588	57.233	174.281	55.406	121.073	43.063	44.007	0	303.854	103.119	161.13	66.799	30.586	34.533	55.19	59.118	87.683	46.398	149.56	0	73.865	57.63
-1.03896		74.517	104.837	112.669	49.202	36.392	44.779	109.834	49.979	67.788	52.876	140.895	18.217	146.852	49.548	184.885	52.347	220.036	54.855	163.107	78.854	187.922	12.773	209.755	69.828	54.201	21.168	295.399	106.755	192.908	37.886	73.806	65.359	43.156	60.711	118.122	82.779	149.451	33.57	126.829	78.061
-0.974026		123.472	99.289	125.38	84.434	123.371	37.155	179.289	45.018	97.371	79.398	169.06	63.038	201.336	88.273	265.224	60.855	320.616	52.697	229.537	97.833	205.75	24.594	219.346	79.926	84.283	44.662	457.183	120.236	235.06	30.36	70.602	54.815	89.644	77.692	132.825	76.324	164.692	55.21	183.74	85.41
-0.909091		170.156	140.143	134.453	113.857	171.476	43.99	184.651	60.837	91.678	84.675	180.647	71.016	241.388	97.157	320.279	95.838	452.583	45.366	473.02	96.194	297.289	46.32	289.759	76.152	160.002	65.993	607.965	145.247	264.635	93.855	132.749	127.798	112.521	103.722	239.773	89.022	234.524	27.223	246.837	116.769
-0.844156		178.415	160.357	199.416	120.458	229.745	56.174	275.124	91.681	127.479	94.416	175.128	50.706	298.828	113.439	416.42	143.99	593.655	64.761	640.431	59.495	433.906	80.656	414.605	66.948	236.65	79.04	770.584	200.845	359.631	170.324	220.171	91.832	124.16	109.813	327.911	109.785	317.578	42.06	386.682	144.928
-0.779221		306.755	193.986	273.503	95.354	294.074	67.071	388.179	98.792	157.482	121.692	222.353	89.078	415.517	115.934	523.07	135.501	757.547	85.307	904.622	162.426	528.734	107.773	515.418	74.452	316.852	71.154	858.615	245.592	461.632	224.533	324.463	145.53	147.683	156.219	451.289	105.58	375.383	63.209	555.497	140.093
-0.714286		401.629	241.486	373.302	153.509	281.965	94.278	528.937	203.866	272.738	133.924	259.335	92.524	458.732	169.796	565.583	232.697	894.276	110.231	1071.47	143.178	723.781	114.156	634.662	79.762	489.397	97.377	979.83	254.512	594.851	270.401	412.13	168.12	238.649	246.631	602.285	142.124	537.178	88.929	631.917	144.342
-0.649351		464.149	352.326	562.802	208.043	404.412	106.841	683.738	281.004	332.405	230.925	336.246	106.102	562.87	236.372	631.431	332.093	1047.61	133.072	1318.76	179.915	1001.54	164.054	770.367	125.791	610.073	85.97	1222.39	298.422	753.463	348.692	562.039	191.542	343.173	368.065	758.376	165.19	671.409	87.703	718.741	170.853
-0.584416		635.809	556.82	803.499	261.691	567.472	136.508	859.951	439.648	452.184	388.241	437.138	149.619	803.295	386.359	711.608	421.163	1244.97	182.22	1559.15	242.799	1304.03	247.406	910.212	154.759	860.508	100.9	1452.7	334.2	941.044	481.329	761.775	237.286	415.455	574.757	910.981	258.307	764.799	66.06	865.332	233.474
-0.519481		828.796	778.381	1071.27	318.771	743.244	171.054	1053.57	678.143	704.909	638.382	523.721	176.156	1024.22	546.548	916.142	592.393	1427.4	241.551	1795.38	341.106	1846.49	357.094	1177.08	202.612	995.809	227.029	1607.95	533.445	1192.96	667.947	953.666	263.673	535.409	975.741	1161.21	427.021	1013.32	105.515	1173.98	319.313
-0.454545		1069.7	1069.55	1506.89	463.603	929.607	253.398	1266.46	958.274	1033.45	997.104	636.5	277.623	1187.64	782.748	1047.52	890.254	1556.92	362.771	2015.64	504.755	2258.34	565.718	1353.32	179.175	1476.49	509.422	1884.07	604.506	1326.69	876.233	1164.52	368.718	728.316	1381.34	1362.75	766.083	1220.51	185.121	1388.17	477.297
-0.38961		1362.67	1608.23	1961.97	729.885	1134.36	428.006	1448.17	1145.52	1266.33	1536.45	726.562	411.924	1428.59	1131.5	1217.46	1524.64	1747.87	531.961	2168.68	817.642	2768.43	872.508	1740.19	326.578	1909.29	1056.01	2192.55	780.149	1585.55	1310.74	1262.71	487.87	917.651	1863.48	1595.34	1480.76	1420.74	274.268	1783.37	759.67
-0.324675		1718.92	2571.99	2381.71	1169.3	1481.05	865.981	1810.73	1590.86	1575.6	2306.74	822.369	643.814	1743.5	1537.01	1502.27	2386.88	1834.99	820.701	2373.08	1347.91	3177.16	1276.41	2400.99	547.355	2419.6	1876.33	2442.9	1048.91	1814.87	1874.44	1511.86	729.713	1117.73	2410.88	1875.28	2309.07	1688.33	475.218	2179.61	1047.97
-0.25974		2084.95	4184.51	2870.99	2062.35	1851.92	1617.62	2275.51	2148.91	2009.69	3151.53	943.069	1063.96	2060.47	2072.48	1686.54	3395.01	2038.36	1309.66	2582.9	2218.97	3637.91	1916.99	3203.56	1053.96	3122.1	2620.64	2666.36	1450.98	1990.93	2809.39	1617.57	1097.72	1310.65	3020.81	2075.5	3488.85	1911.07	960.015	2404.77	1459.11
-0.194805		2330.25	6477.76	3360.15	3367.05	2116.54	2660.51	2717.33	3017.86	2360.03	3818.56	1135.77	1959.88	2474.32	2722.43	1930.25	4208.89	2201.79	2096.97	2745.17	3500.28	3997	2726.5	4311.44	1927.37	3683.92	3190.91	2837.5	1947.55	2200.89	3646.42	1826.72	1475.44	1600.16	3901.02	2187.15	4517.19	2231.81	1783.61	2740.59	2142.68
-0.12987		2555.41	9046.14	4003.63	4646.86	2387.75	3668.14	2974.33	4108.9	2607.12	4478.31	1250.73	3202.26	2833.83	4025.38	2056.89	4745.82	2255.39	2886.23	2778.49	4992.73	4122.02	3610.3	5203.82	3222.73	3883.46	3620.21	2957.26	2730.22	2408.72	4374.71	1862	2205	1744.17	4690.01	2342.06	5330.01	2450.5	2689.61	3160.67	3054.06
-0.0649351		2868.72	11093	4459.71	5664.88	2602.6	4853.99	3238.49	4873.84	2663.53	4894.94	1383.58	4226.97	3118.44	5538.28	2326.69	5019.92	2316.43	3440.34	2808.09	6013.69	4214.28	4438.41	6009.74	4418.04	3958.79	3857.35	3112.85	3644.58	2502.22	4922.42	1879.09	2906.46	1939.34	5486.16	2419.05	6078.13	2557.98	3389.21	3631.47	3928.83
0		3017.28	12069.2	4712.83	5742.66	2783.34	5272.97	3580.91	4962.59	2770.72	5013.47	1591.01	4497	3313.84	6342.06	2337.88	5121.12	2320.99	3681.6	2831.59	6112.79	4338.8	4528.51	6342.76	4874.67	3981.84	3975.48	3179.46	4274.09	2514.39	4923.92	1914.66	3152.25	2061.76	5547.85	2478.57	6440.43	2740.09	3774.24	3775.23	4556.9
0.0649351		2985.24	11317.3	4515.01	4972.43	2691.76	5219.74	3522.07	4674.08	2605.74	4795.96	1579.97	3837.51	3241.85	5821.6	2325.8	4586.19	2207.71	3369.77	2764.41	5739.51	4195.66	3881.75	6276.04	4503.25	3935.94	3770.18	3156.41	4247.96	2480.12	4714.58	1816.47	3096.41	1917.65	5010.68	2366.39	6393.86	2537.9	3492.52	3612.9	4327.84
0.12987		2859.09	9405.65	4273.87	3507.56	2335.98	4311.25	3332.75	4214.3	2400.32	4410.62	1511.72	2658.33	3088.77	4482.59	2310.69	3766.45	2013.79	2829.23	2445.93	5176.76	4022.22	2973.45	5865.65	3678.99	3772.16	2975.32	3130.74	3657.52	2304.8	4392.56	1529.08	2578.11	1723.33	4224.24	2250.41	5740	2243.08	2925.69	3439.28	3662.98
0.194805		2623	7115.38	3819.46	2220.41	2137.1	3165.47	2990.89	3328.55	2275.19	3853.54	1314.92	1732.08	2637.55	3023	2230.17	2614.04	1918.66	2329.68	2331.01	4547.63	3582.78	2189.66	5386.14	2609.51	3463.79	2093.86	2958.1	2580.2	2176.72	3888.75	1408.7	2013.3	1383.46	3109.51	2039.34	4786.47	1871.35	2040.12	3064.7	2917.45
0.25974		2249.49	4992.4	3449.46	1484.39	1848.42	2104.28	2613.69	2502.69	1963.82	2814.64	1089.29	1138.07	2213.73	2024.14	2187.34	1892.88	1735.54	1852.38	2049.45	3606.91	3304.62	1717.6	4980.2	1766.86	3120.88	1321.84	2790.35	1652.32	1932.84	3343.14	1134.23	1652.42	1123.76	2147.07	1813.47	3341.78	1513.16	1374.82	2729.84	2256.96
0.324675		1932.54	3497.32	2913.28	1156.67	1694.88	1442.26	2365.2	1757.77	1773.81	1948.13	927.737	797.589	1806.5	1372.01	2047.67	1346.49	1572.1	1433.24	1837.58	2593.65	3013.72	1254.12	4551.37	1197.42	2668.78	913.308	2475.2	1035.28	1662.29	2871.43	905.049	1353.56	892.961	1399.94	1582.13	2292.35	1272.57	930.833	2231.21	1575.75
0.38961		1640.24	2534.31	2324.6	927.032	1461.34	1125.76	2072.01	1266.91	1434.87	1259.62	798.201	604.612	1523.93	1040.52	1921.27	1019.52	1399.71	1096.48	1624.99	1712.05	2717.41	830.484	3955.5	825.767	2284.36	653.221	2085.66	687.423	1451.65	2304.53	793.161	1162.81	636.636	1078.39	1376.58	1546.97	1041.56	695.313	1914.61	1124.73
0.454545		1340.39	1956.71	1917.39	724.798	1312.56	969.274	1840.61	858.572	1110.08	808.592	623.438	387.424	1222.15	773.696	1792.37	813.446	1231.16	808.617	1333.76	1050.38	2369.03	597.656	3236.87	666.603	1933.63	466.746	1803.65	423.82	1276.03	1831.15	629.775	928.144	473.849	873.012	1125.7	1009.61	922.73	539.934	1727.2	900.964
0.519481		1068.72	1421.47	1526.41	609.431	1116.63	830.172	1476.81	641.879	889.617	673.785	496.541	246.873	989.063	611.25	1648.34	710.324	959.169	593.169	1099.35	674.274	2006.22	488.398	2603	508.805	1552.83	377.077	1463.63	313.371	1013.73	1379.71	553.265	816.362	359.651	685.176	899.856	703.143	760.016	440.758	1540.68	626.163
0.584416		814.421	993.986	1104.23	491.583	921.049	639.146	1120.32	501.789	729.04	543.255	393.478	177.814	882.528	473.744	1569.29	590.765	762.141	453.622	884.244	447.863	1608.16	363.656	2013.32	393.431	1127.63	309.673	1203.49	203.345	698.823	1082.48	463.349	640.399	318.123	552.297	707.014	509.342	639.898	374.793	1213.03	453.199
0.649351		647.408	722.905	787.428	398.622	776.586	533.51	879.509	386.159	616.724	421.99	309.173	157.882	764.312	345.027	1289.79	472.696	583.228	387.12	675.066	307.102	1308.3	286.031	1758.95	361.03	885.22	246.85	1015.15	159.52	557.486	900.204	375.703	589.667	246.54	408.833	587.5	373.931	557.645	334.66	952.926	358.443
0.714286		558.874	489.531	656.491	374.904	624.896	407.283	683.537	293.89	522.726	331.484	240.599	117.109	664.612	377.216	1111.31	386.138	459.818	328.405	579.547	228.696	1017.53	288.656	1449.89	287.656	768.577	245.549	822.753	121.427	415.66	740.558	269.321	425.576	198.359	308.137	461.882	346.539	475.198	270.493	744.143	271.882
0.779221		449.7	410.973	471.742	306.301	508.637	358.768	520.753	220.256	467.867	267.535	221.001	92.073	551.72	322.149	910.499	282.245	325.197	244.518	506.989	121.42	937.953	229.023	1158.66	241.247	586.652	210.907	623.959	79.795	299.576	563.714	174.297	357.746	179.234	299.5	355.007	282.553	375.147	226.182	525.819	224.912
0.844156		338.639	304.588	440.673	244.127	440.854	308.718	397.582	194.884	356.455	238.251	215.432	71.811	457.738	313.015	747.285	190.449	304.185	163.799	372.003	89.959	769.843	173.437	845.666	221.55	518.752	184.886	535.094	72.649	261.471	388.094	135.722	323.845	116.257	270.219	240.171	215.317	294.535	226.119	409.455	212.358
0.909091		224.333	226.612	394.529	277.793	378.332	227.877	287.229	166.025	328.268	197.293	166.05	67.911	438.85	312.268	662.982	166.769	262.115	144.288	279.693	95.741	653.211	145.539	703.153	171.885	426.164	179.397	425.74	59.32	178.585	301.654	95.455	249.778	116.373	249.03	242.204	211.347	307.185	235.172	330.477	180.425
0.974026		188.013	227.67	343.374	266.147	337.854	199.527	211.899	138.8	245.583	160.888	126.218	60.829	353.587	272.896	614.48	114.293	205.61	137.331	193.703	75.512	488.281	146.406	638.812	158.877	402.649	183.471	322.011	83.525	128.697	211.175	80.841	209.817	78.071	187.324	231.027	203.407	285.119	167.761	228.549	166.745
1.03896		163.755	183.653	314.653	311.745	311.524	143.702	184.772	130.739	215.547	143.714	91.355	68.781	284.181	202.045	530.165	106.723	200.944	76.225	69.69	56.713	484.133	85.234	482.681	117.341	332.929	156.089	210.257	36.538	69.595	187.028	73.477	171.129	66.115	132.491	156.02	159.079	219.418	122.291	158.243	119.152
1.1039		90.629	114.704	252.19	332.079	257.898	137.537	165.913	115.632	182.776	146.62	54.708	77.029	262.585	132.016	435.486	78.484	217.059	44.754	56.402	54.073	416.875	76.656	404.725	116.894	289.341	118.588	214.549	26.071	48.383	122.287	58.269	140.619	69.282	136.201	121.956	135.683	196.919	114.376	115.158	115.932
1.16883		97.775	140.299	196.998	310.785	200.701	135.54	157.121	153.501	158.487	125.372	66.656	57.705	213.118	135.183	305.097	42.812	198.676	52.296	32.015	16.303	297.984	28.39	366.915	123.417	280.946	94.05	144.83	19.3	38.558	98.128	73.462	125.287	55.274	113.58	107.636	129.115	199.626	108.957	134.894	98.157
1.23377		46.37	52.446	157.893	244.997	177.901	113.904	117.031	156.792	134.605	117.117	43.329	22.96	167.173	129.276	226.646	52.265	157.542	42.472	3.509	44.36	278.531	43.406	324.308	108.146	233.112	79.171	77.907	2.852	29.63	74.196	55.453	122.003	60.463	101.131	104.902	118.703	167.448	86.351	100.336	104.996
1.2987		8.088	34.592	169.285	169.835	84.259	105.771	71.521	118.524	107.711	84.071	31.046	19.721	152.083	146.104	187.162	43.958	103.18	28.679	0.066	44.477	261.445	31.429	259.041	85.425	199.398	100.562	26.577	10.651	13.53	53.99	28.172	92.675	55.534	70.51	82.356	100.003	103.611	102.921	119.58	93.517
1.36364		0	27.078	146.116	120.629	114.781	89.037	87.045	107.517	102.003	65.237	59.089	18.335	181.318	121.21	158.212	24.003	68.784	35.518	8.172	32.455	226.093	32.406	236.638	77.836	186.444	108.673	60.197	0	1.298	36.691	20.914	95.155	35.968	106.959	88.97	80.239	93.418	99.086	88.143	34.143
1.42857		2.02	0	101.184	139.795	70.519	78.426	79.3	66.636	93.731	61.215	36.023	40.438	175.306	78.518	137.326	12.039	37.393	5.291	3.027	22.42	159.836	34.359	192.848	77.583	184.747	95.501	24.79	7.979	15.168	40.346	33.976	97.811	26.876	71.381	81.885	82.491	86.452	49.096	61.443	66.247
1.49351		13.088	12.653	49.198	121.027	65.156	85.827	57.33	34.587	48.177	46.081	45.277	22.53	145.499	96.581	72.434	1.136	17.661	0	25.016	0	102.781	32.156	128.026	78.916	159.136	134.014	0	32.952	22.466	47.485	21.777	63.181	34.333	61.242	42.501	48.464	85.098	65.381	71.076	58.512

## Sheet: 35 nM holo(H-dN)
Figure 1-figure supplement 2-source data 1
Figure 1-figure supplement 2B
Non-normalized values
	35 nM holo(H-dN)_150 min
Chromosome sample		1		2		3		4		5		6		7		8		9		10		11		12		13		14		15		16		17		18		19		20
		DAPI	mSMC4	DAPI	mSMC4	DAPI	mSMC4	DAPI	mSMC4	DAPI	mSMC4	DAPI	mSMC4	DAPI	mSMC4	DAPI	mSMC4	DAPI	mSMC4	DAPI	mSMC4	DAPI	mSMC4	DAPI	mSMC4	DAPI	mSMC4	DAPI	mSMC4	DAPI	mSMC4	DAPI	mSMC4	DAPI	mSMC4	DAPI	mSMC4	DAPI	mSMC4	DAPI	mSMC4
Distance (µm)
-1.49351		31.622	49.402	1.081	8.224	1.75	57.5	4.776	17.038	31.365	14.736	0	7.968	19.591	92.151	20.483	0	0	0.231	13.946	52.051	65.723	226.406	95.009	150.102	2.363	5.668	0	11.823	20.096	32.385	55.097	13.59	0	34.568	0	45.97	12.636	79.25	101.449	81.321
-1.42857		0	58.087	5.171	5.42	0.708	83.958	0	39.401	3.424	0	31.657	48.932	11.586	104.324	22.726	37.615	8.47	6.156	26.161	57.803	84.7	212.375	119.182	158.713	0.093	1.023	34.346	0	6.791	57.331	0	36.324	25.585	4.21	22.467	0	23.949	66.822	110.154	118.58
-1.36364		25.21	65.376	14.973	6.443	28.792	0	22.193	26.677	0	15.652	4.663	7.807	0	159.739	11.99	29.017	7.671	7.763	16.797	40.374	106.181	219.472	111.65	148.955	18.487	3.532	34.177	26.635	33.179	85.267	39.674	13.149	18.875	8.329	49.438	148.385	57.304	94.461	98.166	154.634
-1.2987		42.482	0	18.402	7.15	18.375	64.958	28.007	0	19.936	41.466	18.073	6.568	18.509	151.747	0	66.508	34.505	16.498	24.906	34.756	124.564	107.283	111.989	161.23	42.307	52.961	24.624	61.879	82.805	88.42	24.293	0	39.803	0	35.13	110.248	55.597	111.45	110.62	197.139
-1.23377		42.136	95.705	24.937	1.616	0	112.583	44.767	9.76	22.945	17.941	71.57	8.814	17.754	122.946	17.481	102.522	23.933	13.734	44.487	36.958	99.342	126.645	153.926	154.3	45.827	55.09	68.415	64.033	58.594	121.301	51.261	11.623	15.981	24.949	40.266	155.609	63.046	134.428	129.077	213.934
-1.16883		73.011	86.334	24.995	29.815	65.708	88.75	73.63	52.139	27.336	3.368	81.58	25.889	55.145	137.062	47.507	104.861	25.131	50.388	49.002	62.685	88.518	213.855	191.93	185.48	54.856	109.193	35.979	36.591	71.267	113.658	54.862	27.492	41.712	26.322	22.343	192.349	53.087	106.24	152.267	249.374
-1.1039		71.576	84.546	10.781	29.278	56	78.833	67.46	75.211	31.001	45.174	100.362	43.544	76.851	141.765	56.234	154.816	39.801	71.002	58.558	58.796	128.46	170.266	202.351	211.106	35.47	143.638	43.987	70.28	84.826	116.985	36.809	42.082	63.409	59.77	44.763	165.385	66.045	135.507	186.943	264.351
-1.03896		44.079	116.093	6.6	16.966	31.542	70.833	73.556	84.936	63.695	67.75	106.157	34.937	133.47	180.343	49.295	171.395	43.663	71.412	37.358	50.674	91.195	153.602	203.1	222.727	52.728	101.26	52.518	65.439	115.736	175.772	58.279	51.838	52.559	110.3	117.929	219.645	104.087	173.28	111.658	267.935
-0.974026		71.829	127.267	23.55	64.346	37.792	66.5	79.417	110.038	70.756	90.373	139.724	12.839	114.828	192.166	64.191	115.247	93.275	126.517	65.764	53.226	122.597	132.792	233.769	246.465	47.961	128.919	47.417	75.194	133.45	200.611	37.648	67.041	117.458	135.016	111.74	165.71	106.002	212.839	182.873	300.789
-0.909091		62.57	112.936	52.01	106.376	86.375	156.333	87.064	124.132	86.703	69.513	191.426	24.294	152.233	197.138	68.277	164.175	114.674	149.533	59.388	66.328	127.406	126.063	281.142	283.036	70.849	144.974	72.397	62.471	112.315	222.891	43.195	31.626	136.486	165.243	162.71	187.438	182.907	229.105	229.648	381.664
-0.844156		112.097	180.417	24.591	134.49	79.25	166.333	127.473	100.682	121.935	72.727	179.44	100.73	214.077	225.31	100.738	193.701	125.529	191.354	69.948	121.312	131.956	182.676	294.818	342.9	73.213	166.344	117.058	96.803	161.593	288.637	59.629	66.898	175.277	295.202	143.793	260.089	240.034	251.629	238.946	426.013
-0.779221		88.135	174.763	89.885	168.539	148.708	231	190.154	124.892	128.464	79.982	241.753	111.573	272.342	248.104	124.997	252.075	129.628	213.096	51.184	103.7	178.617	288.972	350.309	458.17	109.962	188.065	162.88	102.681	196.27	364.428	81.703	104.617	211.037	360.533	194.882	388.538	223.902	344.187	258.752	478.163
-0.714286		100.13	206.378	107.126	216.842	254.25	265.916	253.844	167.237	207.105	142.678	316.367	124.506	306.74	278.71	152.876	379.041	202.227	265.333	113.157	166.541	260.925	376.574	427.717	475.386	121.08	154.421	154.948	132.837	261.137	458.03	164.585	133.723	238.576	540.601	249.982	496.467	384.46	431.862	305.966	528.374
-0.649351		172.18	270.229	120.567	337.458	297.208	320.458	382.15	203.232	233.481	215.04	390.58	207.379	413.684	422.176	171.573	396.036	288.385	384.14	167.738	226.302	313.559	340.367	513.195	556.08	178.04	257.745	176.295	221.62	301.284	518.636	242.77	178.543	338.407	722.107	308.586	625.799	560.424	546.313	362.838	611.285
-0.584416		224.939	337.577	269.92	430.927	479.667	390.833	535.369	251.83	296.397	201.217	602.75	291.82	512.856	580.956	236.509	453.301	354.781	535.328	194.608	279.131	383.315	395.957	668.574	639.933	253.658	353.897	219.3	260.852	366.046	609.711	278.662	276.619	449.134	1011.42	380.308	834.698	719.784	685.505	440.715	763.717
-0.519481		320.198	483.578	372.54	570.556	698.875	448.833	763.456	331.671	393.767	341.432	702.317	360.112	688.414	739.524	295.159	562.129	450.814	675.687	239.111	391.603	493.416	540.38	856.467	746.665	285.753	403.409	361.453	434.094	443.922	757.564	375.722	381.502	623.584	1302.32	523.746	1024.24	829.315	1043.92	571.384	1042.48
-0.454545		480.958	762.062	584.175	793.05	981.625	745.333	1042.87	395.863	575.874	485.683	935.546	523.609	804.612	1216.61	368.945	765.724	555.597	871.766	327.701	514.75	581.263	730.567	1323.79	944.891	347.866	503.915	452.922	657.011	588.705	982.564	492.358	541.207	940.674	1615.05	756.592	1407.67	1008.94	1440.89	723.526	1529.92
-0.38961		653.261	1263.93	822.988	1263.61	1542.71	956.125	1417.64	623.721	721.234	704.375	1268.61	838.351	1055.02	1764.4	438.634	1107.11	764.785	1193.71	441.932	745.99	767.283	1123.53	1676.94	1181.52	491.432	678.753	590.041	1008.32	712.576	1322.37	634.791	804.32	1272.32	1959	1071.93	2157.74	1204.24	2034.57	947.432	2149.53
-0.324675		866.333	2138.39	1136.55	2122.5	1893.62	1817.33	1855.5	909.972	1002.67	1193.18	1696.05	1347.85	1315.64	2631.02	598.476	1559.74	1086.75	1532.01	593.481	1227.02	968.018	1803.16	2305.64	1672.49	668.986	921.744	835.383	1516.37	983.77	1857.95	852.5	1111.14	1740.99	2899.39	1472.33	3485.77	1322.54	2826.96	1162.98	2952.54
-0.25974		1138.46	3623.18	1499.32	3399.54	2428.21	3468.33	2215.96	1495.75	1330.12	1959.07	2088.79	2207.77	1615.55	3917.42	753.856	2351.33	1423.17	2220.86	765.568	2075.32	1220.66	3009.77	2844.45	2755.9	896.931	1421.7	1090.61	2238.37	1406.65	2848.66	1107.38	1732.18	2088.55	4528.53	1883.85	4955.72	1516.92	4134.52	1308.14	4660.57
-0.194805		1428.33	5748.99	1887.33	5253.15	3088.17	5895.25	2504.07	2588.28	1829.6	3165.19	2597.01	3500.84	2008.08	5714.92	1026.95	3820.2	1742.85	3259.31	1000.06	3257.57	1461.69	4794.24	3465.35	4536.29	1171.2	2506.54	1412.13	3228.76	1867.42	4216.26	1572.83	3143.83	2477.72	6623.18	2245.27	6287.33	1650.43	5318.58	1582.04	7242.97
-0.12987		1641.39	7859.26	2410.16	6786.21	3398.88	8736.79	2858.42	4400.14	2229.55	4293.56	3250.86	5061.38	2290.03	7757.06	1399.24	6016.63	1962.26	4666.23	1348.16	4924.94	1648.33	6822.61	3945.15	6648.19	1669.14	4022.39	1787.92	4413.59	2204.67	5971.03	1966.19	5730.17	2960.04	9056.23	2588.75	7761.71	1785.54	6676.06	1893.75	9782.46
-0.0649351		1787.19	9471.14	2658.32	7917.81	3512	10447.8	2900.97	6267.35	2468.96	5132.2	3727.11	6380.18	2501.24	9119.97	1763.29	8124.29	2147.77	5994.44	1666.91	6328.26	1970.63	8611.79	4159.19	8307.04	2021.03	5407.49	2169.37	5204.94	2493.22	7236.84	2393.57	8521.13	3307.23	10721.7	2761.71	8517.94	1837.77	7669.56	2204.45	11506.1
0		1905.95	10025.3	2802.88	8217.8	3688.21	11299.2	2922.68	7541.75	2654.95	5170.1	3924.65	7004.61	2750.83	9909.94	1905.31	9161.7	2231.45	6529.03	1735.09	6924.76	2122.28	9903.32	4278.47	8811.9	2359.77	5879.73	2425.32	5272.81	2678.96	7991.37	2508.37	10313.3	3397.56	11206.8	2784.53	9027.32	1841.9	7952.31	2441.51	11516.9
0.0649351		1858	8896.11	2754.6	7689.93	3243	10467.1	2658.01	7208.57	2560.05	4724.31	3743.83	6047.81	2680.42	8886.98	1868.7	8650.94	2170.32	6044.74	1667.36	6624.13	2116.79	9829.26	3977.12	8221.35	2311.63	5096.52	2400.34	4563.7	2633.88	7789.6	2406.64	9758.87	3149.8	10406	2680.08	7841.39	1727.01	6972.4	2342.34	9885.86
0.12987		1825.97	7375.46	2613.04	6251.5	2805.71	8331.46	2526.26	5794.41	2299.98	3991.44	3179.12	4423.33	2379.93	6630.3	1792.36	6957.25	1849.12	5325.76	1544.21	5586.06	2028.67	8317.06	3612.41	7066.05	2225.52	3733.83	2255.43	3667.48	2550.21	6995.06	2081.16	7913.6	2845.85	8143	2349.16	5736.85	1577.97	5700.76	2170.15	6807.98
0.194805		1721.33	5783.23	2316.42	4479.18	2353.67	6124.67	2246.93	4357.16	1961.18	3057.98	2529.4	2924.38	2136.7	4335.9	1630.64	4947.4	1581.33	4151.99	1310.98	4672.65	1778.85	6531.87	3120.55	5369.04	1896.88	2385.06	1986.37	2705.2	2250.32	5718.21	1624.56	5331.49	2218.23	5246.48	1991.8	3406.19	1383.99	4234.08	1928.95	4310.72
0.25974		1519.19	4130.01	1933.5	2707.36	2102.38	3917.88	1978.03	3198.33	1505.44	2356.89	2068.55	2085.42	1778.6	2594.61	1317.22	3295.95	1291.45	3033.1	1098.37	3581.53	1480.3	4550.01	2503.7	3571.46	1541.45	1264.93	1542.31	1927.63	1954.8	4503.95	1198.65	3436.71	1626.97	2813.63	1648.99	1922.53	1252.74	2909.5	1528.71	2652.11
0.324675		1218.01	2914.27	1582.64	1652.01	1535.88	2616.58	1675.03	2679.31	1155.58	1807.42	1505.45	1480.74	1332.69	1761.82	1178.38	2307.14	1011.22	2121.47	810.648	2507.09	1258.81	3054.57	1864.62	2183.69	1141.64	688.907	1174.19	1462.49	1616.47	3591.06	917.8	2218.58	1019.93	1372.49	1194.61	1155.46	984.738	2090.14	1166.62	1668.16
0.38961		1080.88	2075.31	1185.67	1133.63	1243.04	1920.38	1392.18	2202.04	915.497	1365.76	1094.12	999.402	1049.24	1204.18	976.412	1724.96	805.003	1432.08	626.697	1743.45	994.269	2129.94	1284.07	1281.06	776.851	454.909	942.498	1047.76	1395.61	2802.95	761.696	1624.41	731.751	731.274	908.763	928.71	825.191	1513.83	829.34	1081.09
0.454545		843.869	1517.84	823.971	825.315	947.625	1440.83	1122.62	1727.66	710.81	1052.63	774.114	723.179	862.976	804.372	829.284	1397.6	610.353	957.974	423.721	1178.6	760.167	1569.84	841.533	788.502	540.202	318.448	800.56	862.547	1127.26	2102.28	635.773	1130.09	491.828	486.477	749.828	739.846	682.982	1057.59	551.877	648.659
0.519481		637.75	1076.09	529.643	665.379	743.375	1116.83	891.804	1326.19	573.485	822.68	608.234	498.169	663.025	547.731	690.853	1178.68	481.109	767.06	292.74	670.182	579.37	1117.69	668.756	505.777	380.238	252.526	631.78	659.075	789.53	1554.69	581.488	991.027	352.868	384.005	554.183	603.231	477.984	739.404	390.482	432.78
0.584416		482.351	833.228	337.886	506.113	497.625	933.75	717.294	972.821	459.264	772.273	475.364	379.301	519.757	433.436	527.564	893.56	380.363	641.622	195.759	450.144	444.166	875.475	422.781	373.463	213.131	255.238	490.906	535.372	760.212	1117.69	469.418	808.544	252.424	346.917	455.55	548.124	431.97	526.663	281.125	248.424
0.649351		402.386	712.739	195.285	362.087	415.375	720.875	584.025	743.972	412.87	549.902	385.272	285.237	383.167	340.104	433.335	733.912	296.335	434.357	144.816	332.088	360.818	706.892	273.837	265.555	151.855	146.175	375.687	472.786	615.524	867.2	437.902	610.738	177.523	230.099	324.272	447.426	318.838	357.772	196.804	179.651
0.714286		349.104	591.458	152.562	277.19	277.75	545.333	466.213	633.718	315.907	355.55	317.979	200.006	294.226	263.048	365.505	565.297	233.388	403.63	115.76	244.71	281.978	567.235	186.095	229.894	83.665	107.915	298.691	405.834	502.139	637.146	367.811	524.606	123.671	176.356	263.302	356.71	237.889	224.672	118.329	192.274
0.779221		293.848	484.188	129.303	227.519	283.125	484.166	377.114	546.228	271.455	371.215	275.009	136.258	277.103	257.616	329.246	427.845	180.888	329.008	95.985	186.116	178.214	437.77	148.075	162.605	97.942	105.11	282.927	316.966	387.977	484.702	264.109	490.686	116.518	119.482	214.71	292.373	171.692	159.148	122.072	160.834
0.844156		238.076	447.451	98.877	189.243	232.375	432.083	308.61	471.471	186.425	309.333	229.416	116.429	267.452	191.592	293.423	290.924	208.332	268.51	65.323	123.153	132.63	346.45	137.303	138.973	73.153	46.523	211.921	300.153	326.743	336.654	234.83	392.121	100.783	98.415	238.148	304.337	91.883	186.184	97.044	120.054
0.909091		191.751	421.122	46.569	160.824	184.375	347.083	294.235	413.11	230.231	212.409	178.734	75.887	204.058	170.108	248.371	275.209	98.203	206.762	57.813	95.819	124.029	259.328	92.889	106.772	61.274	49.447	188.514	236.922	249.452	246.633	212.16	308.933	50.615	92.204	206.74	329.444	81.658	169.906	67.285	110.329
0.974026		154.397	393.407	26.339	95.557	151.583	258.5	204.369	331.83	146.83	189.281	123.428	53	151.973	144.728	182.971	216.27	65.052	149.843	46.807	83.839	110.012	225.831	70.54	91.469	53.067	39.821	157.389	203.935	171.709	210.996	169.275	294.012	48.561	58.007	184.787	332.077	91.819	113.103	55.095	86.348
1.03896		124.509	313.944	24.653	76.059	174.125	186.5	194.552	401.232	134.468	179.052	170.388	33.097	111.346	100.709	125.39	182.585	59.128	134.837	10.328	70.77	89.504	149.136	50.927	85.346	49.709	42.056	137.751	259.221	114.791	127.548	167.566	210.909	78.838	67.168	168.941	307.757	36.738	98.768	39.064	45.205
1.1039		117.922	230.142	22.149	41.324	157.25	180.083	144.574	302.098	151.783	134.646	122.551	38.865	128.032	85.474	120.178	140.99	83.444	62.398	23.476	60.729	85.545	119.225	35.97	47.495	40.459	50.919	135.875	199.215	107.449	129.665	130.004	156.25	76.445	50.754	140.97	286.787	28.403	88.594	37.995	50.316
1.16883		111.587	213.061	14.308	28.6	151.375	190.75	167.314	286.505	98.951	84.076	113.246	29.064	95.25	76.863	110.942	117.408	86.227	57.833	28.77	26.401	79.433	121.058	63.05	24.724	18.109	14.518	126.98	160.937	64.383	107.81	113.448	98.873	70.411	60.851	123.663	235.864	9.763	80.219	27.386	0
1.23377		120.293	255.265	21.384	15.907	112.75	173.333	141.992	242.715	96.84	85.644	75.968	4.891	115.555	129.619	97.945	112.465	85.879	59.517	10.259	19.766	59.696	51.374	37.669	55.044	23.565	1.195	83.64	185.845	88.065	36.633	57.302	137.895	73.146	56.5	116.047	304.444	26.205	63.532	35.769	17.747
1.2987		122.923	225.424	32.989	22.791	94.125	186.083	111.044	198.017	74.752	59.519	24.945	11.081	67.2	36.593	88.133	74.85	32.396	44.684	20.022	12.571	74.936	32.505	12.569	53.816	4.713	13.825	70.457	167.872	37.524	33.926	76.792	141.918	64.189	34.756	144.183	286.177	24.014	15.629	10.374	33.659
1.36364		73.254	235.45	21.629	18.879	78.958	147.833	74.706	152.987	29.715	53.068	21.503	48.814	55.684	37.426	44.371	43.92	22.119	24.59	0	23.925	70.551	57.512	13.176	45.625	7.077	12.195	85.098	176.719	8.56	43.908	26.346	117.516	31.38	60.134	87.083	302.491	0.479	11.439	11.431	1.847
1.42857		120.951	266.253	7.321	45.828	101.875	170.833	73.154	209.348	17.255	65.253	42.426	21.929	31.14	42.059	61.604	28.11	16.443	5.389	2.04	25.005	28.144	0	19.054	0	15.993	0	54.612	130.157	0	15.854	59.866	86.971	17.015	75.462	130.586	297.58	0	8.753	0	33.994
1.49351		139.493	238.593	0	0	57.542	124.333	108.968	147.237	4.243	102.819	31.258	0	36.507	0	65.138	0.527	36.225	0	3.662	0	0	30.771	0	33.339	0	2.553	60.26	119.757	9.409	0	24.277	26.905	37.135	71.681	153.988	308.071	6.706	0	2.656	38.469

## Sheet: 35 nM holo(H-dCH)
Figure 1-figure supplement 2-source data 1
Figure 1-figure supplement 2B
Non-normalized values
	35 nM holo(H-dCH)_150 min
Chromosome sample		1		2		3		4		5		6		7		8		9		10		11		12		13		14		15		16		17		18		19		20
		DAPI	mSMC4	DAPI	mSMC4	DAPI	mSMC4	DAPI	mSMC4	DAPI	mSMC4	DAPI	mSMC4	DAPI	mSMC4	DAPI	mSMC4	DAPI	mSMC4	DAPI	mSMC4	DAPI	mSMC4	DAPI	mSMC4	DAPI	mSMC4	DAPI	mSMC4	DAPI	mSMC4	DAPI	mSMC4	DAPI	mSMC4	DAPI	mSMC4	DAPI	mSMC4	DAPI	mSMC4
Distance (µm)
-1.49351		5.5	0	0	10.886	104.364	344.273	15.321	23.921	2.994	19.946	12.445	0	0	0	31.153	0	28.157	25.22	63.049	61.564	12.413	11.185	0	0	27.914	76.401	0	0	14.751	0	0	0	39.926	17	66.549	9.455	26.38	57.083	79.992	61.072
-1.42857		0	5.643	4.481	0	111.273	363	2.84	0	16.858	0	0	12.563	20.827	69.545	52.744	7.07	40.799	25.228	66.785	0	77.501	5.465	16.555	18.599	19.734	71.273	13.087	42.204	16.162	0.658	16.371	33.745	30	25.148	81.087	0	16.241	121.805	18.368	75.656
-1.36364		1.143	0.286	21.056	3.86	116.364	273.909	6.536	11.376	0	62.863	6.96	59.781	22.684	55.945	0	11.434	26.334	0	32.97	23.14	64.305	38.331	17.764	21.882	20.025	111.484	26.799	45.893	52.941	17.303	5.338	61.037	13.63	13.223	86.183	6.963	18.651	118.217	67.536	50.608
-1.2987		8.429	30.143	15.756	36.016	107.182	231.273	13.788	51.228	15.675	94.207	34.312	101.992	17.825	48.538	32.645	50.385	0	15.954	8.988	37.203	56.754	34.964	15.332	63.522	30.714	90.929	35.373	49.039	54.412	47.572	15.42	63.406	23.223	0	61.691	33.207	55.975	122.946	60.224	25.6
-1.23377		7.643	24.857	18.145	35.66	62.455	253.546	10.064	49.811	22.675	59.094	21.96	128.875	14.365	82.662	58.508	35.809	3.166	44.157	33.442	68.696	89.515	91.69	43.463	68.118	51.838	134.896	49.237	85.392	26.556	20.307	24.121	89.437	0	36.704	62.115	34.464	105.176	94.001	49.24	93.792
-1.16883		2.572	42.5	29.477	17.465	70.364	292.182	45.36	68.43	32.988	53.55	49.281	151.023	14.636	102.57	38.941	19.159	6.241	41.491	0	63.376	96.734	33.043	95.187	64.706	51.2	103.983	57.437	102.229	22.86	60.389	51.05	83.435	35.074	21.926	64.635	46.54	80.362	172.44	45.344	86.856
-1.1039		53.786	39.286	27.134	30.929	97.819	290	38.434	94.966	55.663	95.781	83.203	183.469	45.592	115.015	30.421	54.058	31.083	28.604	60.081	51.351	74.25	47.666	30.478	81.32	58.141	99.052	75.574	102.603	39.616	66.229	36.261	103.067	47	32.778	66.117	48.895	79.858	155.556	24.488	75.464
-1.03896		40.857	98.214	34.473	45.693	165.909	242.091	66.242	98.911	51.811	93.029	52.312	193.484	45.537	172.506	34.544	63.274	59.859	29.225	49.708	53.268	39.105	65.341	50.423	136.512	61.745	69.206	58.649	159.816	54.832	102.777	27.219	125.029	7.852	62.704	83.487	34.71	71.354	196.6	27.2	110.92
-0.974026		53.143	99.286	44.656	68.243	70.455	343.273	67.43	117.345	59.923	97.562	107.148	245.75	91.744	235.543	72.072	74.574	92.27	61.373	59.152	69.948	20.668	88.265	64.475	153.835	62.34	124.889	75.322	74.401	74.005	74.411	55.036	150.196	31.63	48.037	110.243	48.994	124.874	223.007	46.424	126
-0.909091		17.429	93.214	23.511	86.255	111.273	287.182	55.707	130.463	80.74	124.183	142.156	349.648	106.553	282.616	48.714	88.747	96.342	74.742	25.116	35.499	103.99	102.405	43.402	169.196	59.502	129.068	62.371	144.851	86.462	108.043	78.63	202.525	45.149	77.111	134.142	72.73	179.078	214.402	92.312	127.408
-0.844156		105.572	147.429	35.579	98.717	124.182	328.909	65.374	137.633	135.941	142.858	163.476	419.594	126.74	284.651	69.995	97.499	150.053	99.804	88.276	101.292	117.085	149.194	123.832	185.28	77.366	116.746	105.639	258.416	85.406	115.876	82.359	228.937	62.223	62.963	144.838	68.528	123.829	234.689	124.784	152.792
-0.779221		140.143	134.714	82.457	129.312	139.546	247.364	107.535	202.849	118.284	188.846	225.312	579.906	149.57	311.918	82.035	135.028	176.391	115.472	108.124	116.899	161.9	146.264	113.57	210.543	71.823	147.251	150.842	286.733	104.286	186.739	85.793	254.456	77.63	103.815	144.846	60.027	172.314	253.971	103.904	199.872
-0.714286		100.857	224	81.661	161.273	187	345.546	107.073	250.121	177.006	255.041	257.476	756.625	203.303	342.392	100.835	183.876	246.634	165.861	115.329	158.7	174.311	143.167	80.097	291.182	86.131	154.21	111.475	338.75	138.021	266.196	133.26	285.725	88.111	132.667	157.015	66.794	185.533	261.983	93.016	227.992
-0.649351		149.429	202.5	90.919	203.49	220.546	383.091	158.261	328.862	234.716	298.923	363.593	1074.23	285.564	444.314	142.066	212.354	242.989	242.928	154.122	165.556	180.02	254.191	84.631	297.067	135.641	230.15	178.189	390.342	181.506	324.426	153.212	364.758	179.037	208.371	143.504	127.954	222.981	329.55	146.224	228.8
-0.584416		183.286	268.857	136.641	209.768	219	551.818	237.081	349.719	312.414	338.893	460.601	1666.41	383.686	605.705	187.751	266.451	406.339	360.019	158.525	229.666	207.064	299.708	122.813	312.025	205.434	257.15	211.39	602.597	282.038	370.836	206.024	406.1	228.852	245.074	196.365	178.92	282.109	405.856	145.84	282.184
-0.519481		267.714	374.857	164.832	310.095	362.909	680.182	302.782	455.052	407.953	403.769	559.687	2318.47	483.085	882.192	285.761	310.648	549.744	533.987	234.637	334.215	231.29	351.431	202.425	441.652	255.971	353.146	268.564	912.922	373.897	484.508	254.253	462.182	341.408	325.778	303.962	268.473	344.274	459.434	191.768	382.448
-0.454545		408.786	474.714	204.139	454.335	538.364	951.182	409.424	570.981	524.142	602.917	721.195	3041.12	625.044	1342.63	372.32	431.236	789.312	1025.77	318.779	476.329	358.316	612.433	375.492	724.23	451.759	472.641	389.799	1327.79	587.193	613.033	431.262	573.684	517.667	539.334	432.052	329.163	463.261	656.116	269.096	418.352
-0.38961		634.714	677.143	333.229	785.746	766.728	1408	535.409	834.118	753.988	997.71	941.593	4031.92	884.916	2251.24	525.028	670.859	1193.88	2053.45	351.744	622.079	580.133	872.926	578.945	999.351	630.165	753.019	535.533	2029.35	979.798	1040.98	595.136	1028.93	855.741	693.371	625.186	435.586	667.836	859.873	419.832	603.92
-0.324675		1070.14	1151.71	517.196	1630.03	1187.64	2615.91	728.061	1459.07	1028.44	1755.38	1245.81	5140.03	1188.14	3546.02	766.321	1181.48	1694.7	3978.89	506.134	1255.08	763.446	1439.93	836.068	1569.6	800.332	1272.09	724.382	3246.11	1531.89	1888.08	966.111	2137.33	1168.7	1135	867.627	678.148	995.116	1254.03	565.624	1052
-0.25974		1707.57	2200	802.303	3480.57	1608.73	5484.64	979.583	2662.51	1372.17	3510.76	1629.06	6317.06	1519.42	5635.83	1095.65	2130.1	2187.24	6529.9	675.039	2418.9	1189.1	2635.94	1308.59	2465.63	1098.31	2320.91	986.476	4861.05	2096.23	3399.85	1468.65	4330.2	1492.56	1892.59	1165.91	1138	1460.65	2153.7	849.384	2073.44
-0.194805		2333.14	4256.86	1260.1	6495.99	2247.91	9701.27	1400.35	4388.85	1829.62	6533	2003.76	7545.38	1957.7	8149.4	1527.47	3944.61	2654.12	9158.52	990.519	4278.15	1682.25	4512	1923.27	3708.1	1399.28	4081.45	1339.28	6802.85	2792.49	5837.32	2057.98	7745.37	1822.96	3219.07	1687.17	1756.03	1937.76	3611.69	1309.64	3663.52
-0.12987		3285.14	7355.57	1852.44	9697.7	2861.27	14493.5	1914.19	6523.53	2228.4	10102.4	2360.87	8256.99	2239.74	10503.4	1930.92	6652.22	2911.33	11429.8	1219.93	6249.44	2125.66	6832.28	2439.83	5246.98	1896.83	6374.77	1734.09	8778.48	3422.7	8831.03	2639.66	11106.8	2166.33	4518	1879.1	2559.3	2588.35	5266.53	1681.9	5652.69
-0.0649351		4089.07	10721	2543.93	11645.7	3366	17796.3	2335.69	8238.73	2554.06	13504.7	2539.73	8613.34	2503.59	12250	2333.73	9304.72	3048.19	12216.8	1452.68	7588.69	2539.14	8457.4	2871.22	6364.35	2201.92	8761.2	2018.63	10515.7	3774.33	11625.5	3037.52	13381.3	2333.63	5951.15	1969.64	3331.67	3253.69	6611.29	1938.68	7431.66
0		4275.29	12983.8	2977.1	11728.2	3839.91	17997	2580.27	8603.62	2720.94	15663.4	2655.56	8729.71	2642.99	12470.2	2721.23	10976.2	2980.43	12246.9	1666.66	7854.23	2671.7	8531.5	3123.29	7049.08	2361.36	9997	2242.03	11494.3	3854.5	13038.3	3167.17	13495.8	2333.74	6625.89	2005.47	3729.94	3526.39	7018.27	2055.22	8721.8
0.0649351		4144.86	12808.4	2955.73	10141.3	3571.64	15633.5	2489.76	7891.81	2571.45	15520.3	2508.36	8303.88	2441.48	11144.8	2555.65	10949	2801.1	11479.5	1657.58	6615.65	2646.34	7227.32	3113.75	7006.55	2319.65	9686.91	2233.48	10808.5	3311.15	12780.2	2942.18	11420.2	2167.26	5908.22	1894.58	3497.18	3525.6	6372.03	1882.82	7787.72
0.12987		3599.14	10555.5	2764.3	7607.59	3155.73	11715.8	2215.56	6578.96	2420.03	13292	2142.75	7080.91	2323.31	9238.9	2217.83	8873.71	2253.49	8839.05	1587.31	4423.02	2124.99	5191.46	2954.58	6169.79	2302.54	8265.15	2045.96	9312.16	2541.92	10937.5	2638.96	8794.45	1913.04	4514.89	1790.48	3279.78	3300.66	5399.87	1705.96	6354.66
0.194805		2925	7427	2398.07	5418.88	2705.09	8678.18	1807.06	5207.78	2028.5	9896.53	1872.3	6024.31	2035.48	7616.12	1934.7	6010.97	1774.78	6228.28	1302.62	2752.81	1707.53	3620.93	2528.16	4899	2008.48	6064.09	1791.71	7273.42	1878.12	7922.33	2215.63	6341.86	1617.19	3231.3	1742.45	2950.15	2724.39	4181.63	1476.88	4319.67
0.25974		2274.29	4907.57	1972.99	4228.69	2283.36	6167.18	1425.13	3689.34	1642.18	7150.9	1531.31	4896.66	1704.44	6266.76	1361.2	3644.63	1349.88	3853.13	1023.53	1752.33	1405.6	2570.74	2046.43	3597.12	1610.41	4197.72	1548.1	5069.43	1272.94	5050.08	1684.59	4585.41	1327.26	2185.44	1515.89	2523.66	2130.77	3136.16	1084.68	2761.69
0.324675		1619.71	3614.43	1634.52	3255.7	1539	4591.09	1050.76	2515.82	1293	4798.48	1216.76	4079.62	1440.47	5150.52	982.024	2230.51	986.791	2336.63	831.637	1264.56	1147.03	1991.61	1580.68	2490.46	1306.39	2998.5	1297.66	3710.13	897.744	3009.06	1271.51	3270.51	854.852	1446.93	1196	2191.84	1649.27	2264.59	866.424	1762.4
0.38961		1153.71	2695.93	1356.68	2546.28	1235.45	3490.45	856.922	1705.91	960.521	3205.05	951.281	3347.7	1175.36	3982.31	705.107	1570.54	735.355	1655.81	645.424	975.966	871.489	1422.17	1186.61	1870.02	1023.36	2217.06	1011.38	2761.43	695.494	1986.82	961.264	2252.16	638.963	1196.85	951.859	1676.21	1283.6	1703.83	615.568	1231.28
0.454545		855.643	2100	1087.39	1959.73	873.182	2755.27	662.495	1260.65	702.905	2172.7	685.546	2637.72	997.063	3125.95	508.035	1199.77	558.415	1286.56	505.191	759.049	601.905	1061.5	827.916	1401.54	701.764	1574.84	832.92	2120.29	500.759	1474.66	715.207	1664.87	489.778	970	685.202	1336.11	912.205	1241.23	438.224	830.44
0.519481		698.572	1636.07	910.964	1489.93	648	2234.73	519.549	950.945	539.053	1557.12	509.437	2006.89	855.518	2300.47	379.502	937.962	447.797	995.318	445.028	525.777	442.765	807.894	626.77	1141.67	567.106	1153.42	693.232	1685.46	351.797	1238.91	539.764	1248.25	335.704	752.408	546.348	907.404	729.745	951.077	329.496	582.376
0.584416		511.143	1174.86	806.534	1305.25	570.182	1816.64	402.247	746.498	441.13	1175.97	454.124	1557.75	683.213	1793.25	273.515	708.791	358.567	785.138	346.588	490.215	355.337	608.284	408.952	919.315	418.43	813.775	607.734	1473.29	263.242	837.717	407.306	897.986	238.963	625.111	382.021	689.644	494.157	674.999	241.256	419.368
0.649351		410.714	955	561.058	949.172	402.819	1355.73	291.79	552.953	366	944.603	378.406	1302.66	544.108	1386.95	247.868	545.877	265.744	644.329	274.649	387.037	272.391	495.889	350.52	718.882	303.437	707.819	470.97	1286.06	214.14	610.634	292.826	711.411	209.778	551.223	304.202	609.093	368.186	481.788	179.224	300.2
0.714286		307.857	708.286	459.848	746.811	320.273	1039	227.307	503.182	251.811	718.834	342.578	1023.81	488.248	967.531	218.547	428.506	206.983	504.365	202.093	355.226	207.654	398.827	298.646	599.183	221.015	548.795	339.519	1025.33	184.003	523.541	241.108	594.53	166.593	415.26	243.464	448.418	263.888	354.764	121.24	265.136
0.779221		243.572	638.286	376.044	688.938	255.728	686.273	194.837	414.147	244.911	568.905	278.062	851.336	411.62	839.412	153.402	407.456	221.931	406.767	153.712	253.019	180.436	302.258	250.19	569.047	181.504	391.148	311.118	839.962	179.209	414.188	219.189	516.538	173.297	349.63	157.01	387.409	211.176	263.001	81.032	187.056
0.844156		256.5	603.286	341.625	627.943	245.728	564	143.636	326.456	183.941	504.508	222.585	748.125	369.219	717.004	142.434	360.547	193.862	365.184	140.941	262.256	163.678	230.1	209.318	534.131	152.399	307.55	299.264	775.405	119.112	329.144	167.169	441.419	171.778	261	149.384	314.774	168.681	236.57	55.4	145.48
0.909091		142.143	488.071	288.162	554.609	139.091	458	113.524	273.575	150.272	410.579	195.593	624.75	262.276	579.817	147.907	324.371	116.314	313.601	139.069	206.513	132.022	230.691	145.822	461.846	111.535	218.68	258.232	698.485	109.331	264.472	112.632	408.633	83.186	181.926	120.49	243.343	130.684	215.217	43.752	120.56
0.974026		179.572	389.857	206.909	519.25	190.364	408.182	87.909	266.409	126.621	372.041	157.851	539.75	221.755	519.023	109.356	270.84	116.441	325.77	179.39	242.438	82.612	142.167	176.466	434.8	103.414	197.293	241.075	623.68	93.86	268.017	91.625	290.44	152.63	237	107.928	177.501	127.029	179.43	64.224	140.8
1.03896		114.143	375	185.22	453.667	104.819	288.182	86.001	229.588	122.734	276.307	129.187	449.117	200.689	496.278	97.103	202.093	125.647	244.333	150.286	211.8	74.91	97.92	100.8	377.119	84.73	129.106	184.149	611.937	64.675	203.979	93.314	259.782	70.297	199.667	87.025	132.152	128.496	137.297	60.96	100.168
1.1039		74.286	356	198.336	395.003	141.909	340.909	56.89	155.754	102.911	222.266	116	379.25	163.84	444.449	137.33	155.334	119.664	219.934	122.572	145	57.006	114.185	114.355	307.529	61.988	170.289	186.269	525.312	71.051	152.279	95.436	206.963	56.926	110.778	63.421	132.952	102.561	97.319	31.672	72.792
1.16883		87	300.357	159.163	340.151	79.091	245.273	52.894	143.958	71.769	195.455	86.374	292.828	157.306	380.37	58.36	138.334	98.308	188.263	91.304	143.868	36.138	101.12	92.042	323.403	45.191	91.072	188.599	501.416	64.093	131.421	51.783	234.126	63.074	98.26	46.71	82.843	63.335	82.844	40.672	60.536
1.23377		54.072	282.143	151.04	314.78	110.637	139.182	46.29	140.237	70.03	190.911	93.64	236.406	125.768	375.045	76.922	117.554	100.703	185.042	103.941	133.096	16.499	99.719	57.028	268.221	37.292	56.808	182.842	426.357	40.395	106.779	40.716	163.159	50	100	58.122	40.423	56.097	51.181	29.48	14.896
1.2987		56.143	201.857	126.644	309.178	62.819	92.637	29.788	106.555	49.876	154.449	37.812	230.109	111.754	314.285	50.186	100.04	107.92	141.85	77.572	98.11	51.076	62.877	72.683	176.486	20.499	92.861	180.132	402.98	40.843	67.646	17.877	154.985	60.371	72.223	22.068	11.067	55.13	66.252	16.024	0
1.36364		23.643	207.286	114.056	276.646	53.455	81.546	23.434	90.876	61.379	150.71	6.374	171.125	112.315	257.907	69.73	120.863	86.477	88.187	57.471	66.601	59.194	14.577	43.108	215.804	2.473	15.573	171.03	345.127	26.129	69.127	19.642	136.251	40.297	84.297	19.532	14.93	33.195	45.13	3.344	14.552
1.42857		56.572	148.571	86.723	207.225	36.637	84.455	30.839	102.081	20.166	92.556	30.281	185.836	80.107	216.13	59.889	93.95	78.482	79.096	71.164	76.173	10.674	65.408	97.085	174.1	0	5.678	173.411	375.128	24.151	50.018	15.889	161.794	47.889	79	25.264	5.049	7.139	25.255	0	8.888
1.49351		54.643	123.571	97.094	178.288	0	0	0	83.658	3.562	115.136	24.734	143.937	96.524	195.145	72.847	79.737	63.872	58.106	84.903	72.875	0	0	33.255	185.855	21.975	0	195.882	293.615	0	11.376	4.377	80.348	47.63	43.704	0	9.785	0	0	15.872	23.328

## Sheet: 35 nM holo(H-crCH)
Figure 1-figure supplement 2-source data 1
Figure 1-figure supplement 2B
Non-normalized values
	35 nM holo(H-crCH)_150 min
Chromosome sample		1		2		3		4		5		6		7		8		9		10		11		12		13		14		15		16		17		18		19		20
		DAPI	mSMC4	DAPI	mSMC4	DAPI	mSMC4	DAPI	mSMC4	DAPI	mSMC4	DAPI	mSMC4	DAPI	mSMC4	DAPI	mSMC4	DAPI	mSMC4	DAPI	mSMC4	DAPI	mSMC4	DAPI	mSMC4	DAPI	mSMC4	DAPI	mSMC4	DAPI	mSMC4	DAPI	mSMC4	DAPI	mSMC4	DAPI	mSMC4	DAPI	mSMC4	DAPI	mSMC4
Distance (µm)
-1.49351		5.834	0	0	41.826	0	0	0	5.657	20.372	2.036	41.333	127.9	81.582	135.243	111.131	74.365	86.786	62.749	4.255	42.396	20.523	71.164	0	37.24	1.271	0	0	78.96	31.687	73.163	210.47	470.776	8.373	18.165	130.824	27.245	67.382	53.114	103.651	172.41
-1.42857		10.999	15.734	12.942	37.77	47.379	27.981	15.336	32.092	0	0	44.6	128.9	95.329	116.177	121.558	64.165	0	65.219	0	41.953	26.976	72.5	28.436	71.546	0	9.336	40.022	73.811	44.856	106.148	195.585	403.993	44.628	34.986	140.225	96.214	72.215	68.229	121.177	178.442
-1.36364		15.91	24.2	43.797	95.748	42.285	18.805	24.732	38.585	49.033	23.114	41.533	189.367	122.577	187.326	72.638	95.502	36.107	77.887	6.848	0	41.843	85.894	50.015	67.465	26.909	8.208	48.032	117.04	60.303	114.28	194.199	463.159	8.514	28.039	173.595	73.945	54.559	0	90.687	184.35
-1.2987		25.98	22.669	41.756	90.235	76.102	8.118	6.349	74.554	41.552	31.506	52.433	189.333	147.082	124.59	73.329	115.979	65.43	119.262	9.605	7.072	59.557	117.967	50.104	53.56	45.736	81.246	39.373	101.155	72.713	138.257	189.033	486.428	25.628	47.333	149.612	68.39	51.063	89.763	126.886	222.144
-1.23377		0	39.909	75.806	119.125	83.276	45.237	29.266	60.362	23.454	41.579	78.8	196.9	122.028	161.944	71.871	120.791	72.346	101.202	22.699	56.449	41.066	173.221	45.693	101.402	52.999	68.528	22.822	120.011	74.386	152.565	197.883	466.981	34.515	47.092	156.4	125.336	50.715	37.424	139.121	247.412
-1.16883		25.387	49.037	91.854	155.42	95.377	26.476	58.325	55.472	35.219	87.138	100.8	244.733	128.008	196.198	76.231	167.385	70.092	114.784	19.392	92.673	39.267	165.957	31.252	100.929	46.743	106.924	48.04	185.8	99.215	206.226	173.341	482.721	35.57	67.974	159.651	124.666	71.818	54.662	163.613	290.398
-1.1039		18.832	71.639	129.998	183.14	121.761	42.726	86.503	87.24	63.575	111.513	89.533	206.5	156.614	229.766	137.026	191.697	100.681	156.257	47.737	60.097	74.623	147.675	86.393	165.821	45.895	205.62	80.466	225.314	81.11	242.084	203.497	494.67	38.635	61.78	136.712	108.996	47.123	92.679	178.961	309.634
-1.03896		34.772	104.234	96.963	191.91	132.534	46.561	63.298	113.601	82.015	102.666	125.2	275.3	154.423	255.622	99.901	218.195	106.53	172.633	34.97	69.487	96.886	229.675	67.305	216.508	72.717	200.834	114.581	271.168	136.026	260.441	223.272	505.943	52.994	95.552	138.482	89.292	51.09	105.668	213.042	293.708
-0.974026		39.952	146.251	109.959	300.411	175.135	102.12	72.476	233.036	83.063	201.901	104.267	374.5	146.199	255.04	111.075	214.779	92.822	195.531	40.372	99.316	137.696	291.429	56.709	276.88	92.45	221.185	147.086	316.936	181.444	266.778	242.063	524.929	56.296	125.501	163.103	92.77	80.113	138.72	191.349	388.038
-0.909091		43.265	203.88	155.579	348.889	183.563	181.178	98.429	177.766	99.147	216.548	96.533	442.533	187.734	301.296	153.367	285.686	133.778	220.656	47.79	122.772	160.238	333.589	97.13	289.987	101.714	321.517	142.438	299.002	180.148	315.335	236.969	588.58	74.06	118.863	195.432	116.41	57.009	188.145	180.364	412.038
-0.844156		91.607	198.608	183.076	376.426	231.574	120.077	127.216	319.343	111.733	332.35	101.4	466.9	232.196	306.315	211.39	269.326	162.532	233.908	70.744	222.677	167.485	392.144	147.87	390.521	145.585	448.786	221.6	308.24	182.729	363.945	262.503	591.852	129.512	226.499	231.055	206.587	72.241	231.315	265.705	445.103
-0.779221		133.622	236.317	230.819	446.718	307.471	154.959	143.285	428.153	140.758	484.431	129.867	585.5	274.174	435.53	256.056	318.847	222.359	284.27	123.122	228.61	234.668	440.229	149.657	534.092	169.894	593.44	283.2	364.483	235.622	452.258	250.965	649.994	193.723	259.826	280.549	223.856	102.425	306.855	282.154	518.554
-0.714286		151.758	315.51	286.117	581.501	389.558	260.041	254.199	586.543	177.703	574.622	207.533	705.633	335.96	521.889	315.538	429.495	208.811	281.996	172.508	285.715	290.919	526.089	179.255	644.45	228.202	770.835	271.605	386.595	275.896	500.039	332.663	718.01	235.596	232.831	333.168	226.283	104.252	417.685	310.721	611.716
-0.649351		172.744	394.935	385.622	756.728	488.759	327.501	292.216	724.294	230.864	756.543	182.1	884	387.788	601.314	417.91	478.782	327.76	351.536	203.491	347.337	388.053	782.436	218.162	873.919	324.506	979.476	342.514	477.226	284.853	693.542	365.143	846.707	298.912	281.184	369.287	248.778	155.503	488.927	385.464	678.541
-0.584416		228.9	543.351	516.262	1087.14	616.938	415.687	342.741	974.805	326.24	1035.82	220.8	1149.03	470.051	697.902	434.503	576.642	351.323	425.774	320.121	485.771	460.581	989.881	265.251	1219.39	462.111	1288.88	446.936	610.517	380.296	1135.98	460.707	998.071	444.823	413.013	455.204	347.514	154.176	418.395	496.954	781.584
-0.519481		313.247	759.485	755.808	1448.54	716.052	558.617	545.568	1171.8	436.369	1369.71	266.967	1380.93	629.609	774.814	610.952	700.132	483.457	559.386	459.749	684.539	553.998	1367.75	383.172	1543.63	543.841	1643.61	588.04	820.44	458.544	1526.68	581.619	1264.94	665.715	574.384	653.634	462.082	254.83	463.122	570.438	891.7
-0.454545		417.695	1136.41	981.101	1980.89	950.517	864.705	718.905	1543.42	602.431	1852.07	423.2	1912.1	795.726	1030.68	865.229	1013.89	689.678	715.072	679.266	1010.74	797.238	1878.22	546.785	2008.79	707.532	2038.39	764.891	1148.4	653.967	2021.61	747.29	1885.31	923.341	799.008	913.796	579.58	391.584	694.939	701.476	1082.45
-0.38961		672.921	1705.17	1305.58	2666.51	1215.19	1330.91	938.957	2104.03	804.304	2904.82	531.167	2471.97	1076.24	1347.85	1167.6	1424.51	956.728	1008.03	928.384	1697.64	1094.25	2601.51	749.154	3041.27	986.317	2841.93	923.536	1688.92	1022.62	2728.86	927.784	2962.32	1382.8	1215.24	1177.45	822.169	578.134	1053.47	935.667	1423.88
-0.324675		972.346	2597.5	1675.38	3707.94	1601.57	2295.43	1298.61	2966.18	1079.58	4664.63	726.6	3537.17	1509.85	1850.48	1673.59	2384.92	1443.49	1376.32	1217.82	2810.99	1439.21	3287.21	1054.16	4820.46	1255.02	3924.72	1213.59	2394.01	1481.34	3754.89	1299.84	5214.54	1856.58	1889.21	1661.77	1280.19	830.641	1779.02	1222.04	1768.97
-0.25974		1409.93	3935.74	2221.61	5031.12	2092.82	4203.7	1759.41	4435.45	1451.07	7373.78	892.4	5158.6	1939.43	2755	2233.18	4085.24	1937.48	1744.38	1546.86	5063.03	1777.02	4906.43	1296.63	7203.4	1400.15	5647.68	1561.92	3692.73	2114.92	5612.68	1795.81	7916.18	2313.93	3056.48	2117.99	2086.82	1189.64	3282.23	1599.72	2363.73
-0.194805		1812.4	5865.11	2672.11	6671.22	2687.06	7882.34	2172.42	6247.55	1899.53	10536.4	1119.47	7769.97	2496.23	4133.38	2903.36	6769.48	2490.83	2659.52	2010.13	7988.96	2130.21	7570.75	1743.31	9524.67	1706.77	7727.19	1990.2	6238.16	2885.22	8005.28	2207.58	11047.7	2859.86	4488.97	2551.31	3438.36	1500.93	5662.14	2152.07	3293.34
-0.12987		2122.49	8194.95	2923.39	8094.25	3111.32	11829.7	2803.45	8667.77	2208	13313.7	1451.3	11424.6	3031.76	5530.3	3554.18	9617.67	3014.46	4270.33	2300.3	10973.4	2552.37	10626.8	2178.45	11700.7	1957.49	9630.06	2402.7	9700.43	3683.99	10769.4	2657.36	13626	3395.29	5960.03	2905.8	5522.07	1817.62	8985.38	2577.78	4345.25
-0.0649351		2336.14	10559.8	2935.83	9335.42	3356.39	14454.5	3172.42	10389.8	2398.84	14705.7	1672.6	14331.1	3337.21	6567.72	3981.69	11785	3607.77	5793.06	2419.53	13271	2906.49	12746.4	2361.47	13335.7	2087.36	10826.4	2706.22	13125.1	4467.21	12773.6	3162.38	14939.8	3843.28	6998.66	3223.36	7765.5	2008.28	11953.9	3038.33	5421.05
0		2352.94	11967.3	2891.55	9875.04	3367.09	14688.2	3245.15	10803	2645.2	15434.2	1789.43	14990.8	3428.8	6822.07	4020.68	12113.9	3869.19	6608.8	2602.39	13317	3138.15	12964.6	2511.55	13986.5	2137.66	10900.5	2804.81	15057.5	4986.16	13398.9	3406.8	15009.3	4051.82	7149.29	3386.45	9336.42	2119.1	13229.6	3359.46	6235.99
0.0649351		2119.31	11817.8	2411.59	9354.67	2864.94	12816.8	2995.23	9895.14	2568.61	14327.8	1701.73	13377.4	3099.99	5768.75	3970.17	10845	3752.69	6205.64	2467.51	11474.2	3081.12	10771.9	2498.1	13915.3	2136.22	9814.16	2534.08	14894.2	4935.91	11539.8	3370.54	13029.2	3810.51	6417.94	3148.32	9238.83	2071.45	12568.9	3176.65	6233.11
0.12987		1748.88	10436.2	1797.48	7879.86	2193.44	9080.03	2550.1	8017.65	2344.71	12626.9	1510.1	9524.7	2400.58	4243.3	3389.47	8087.36	3287.26	4798.72	2227.14	8327.03	2928.26	7664.35	2331.55	12353.1	2036.19	8313.08	2142.36	12582.7	4635.75	8462	3108.88	10144.7	3247.47	5104.18	2642.72	7794.65	1807.97	9858.34	2605.79	5773.5
0.194805		1261.93	8356.45	1287.06	6017.38	1850.94	5945.01	1919.13	5568.12	2201.29	10202	1314.93	5736.77	1783.25	2763.47	2694.18	5678.8	2648.12	3268.37	1883.27	5185.99	2557.02	4664.02	2080.83	9604.17	1704.97	5971.99	1799.32	8647.22	4157.14	5381.2	2759.44	7176.45	2661.9	3756.56	2145.24	5715.4	1436.19	6761.2	1989.33	4656.53
0.25974		1038.3	6759.65	840.008	4465.93	1461.39	3711.83	1410.25	3454.14	1939.06	7395.42	1036.7	3246.3	1240.51	1589.89	2117.82	3445.46	2110.56	2025.65	1410.18	3149.29	2090.28	2661.4	1799.32	6708.3	1408.02	3792.28	1372.55	4996.68	3329.62	3068.01	2180.61	4662.8	2030.07	2553.12	1767.19	3786.37	1108.35	4151.96	1584.1	3291.42
0.324675		860.215	5389.83	604.616	3076.8	1208.77	2291.66	940.901	2154.1	1549.31	4822.02	772.6	1817.5	773.997	906.693	1668.95	1848.18	1428.63	1287.1	1083.42	2333.71	1668.08	1624.35	1406.09	4297.61	1035.32	2315.5	1087.61	2664.72	2598.08	1612.37	1691.1	2962.65	1490.85	1712.62	1234.64	2338.35	784.083	2557.96	1105.53	2241.22
0.38961		663.905	4329.08	450.854	2257.01	949.434	1537.99	628.711	1369.76	1191.69	3088.5	621.433	1276.33	532.893	565.328	1211.9	1103.44	978.066	831.58	797.046	1923.03	1221.99	1121.21	1113.09	2662.09	742.946	1614.56	776.341	1444.29	1854.04	898.723	1207.24	2068.68	1138.18	1155.73	930.366	1526.2	563.291	1662.4	792.276	1564.75
0.454545		568.422	3240.72	369.841	1532.98	727.893	1147.33	480.76	1009.25	881.131	2108.35	489.867	1041.3	373.225	403.128	954.187	757.682	597.281	569.4	575.694	1528	957.949	803.546	852.015	1673.1	542.912	1152.35	579.68	934.48	1205.24	583.575	878.767	1467.21	889.936	770.304	623.24	1026.62	364.207	1161.51	606.758	1130.59
0.519481		436.791	2439.29	209.677	1017.99	680.482	862.684	311.469	768.52	655.664	1590.82	365.9	773.3	246.983	279.64	687.799	555.306	353.103	401.974	414.814	1112.46	647.999	573.959	652.627	1168.22	388.543	913.169	450.845	690.698	751.633	405.188	683.064	1069.13	624.905	570.045	418.623	735.455	185.438	944.634	445.398	870.056
0.584416		314.743	1897.03	168.288	727.91	572.475	680.368	230.716	636.235	505.59	1351.13	269.267	547.5	143.814	269.747	463.293	440.383	215.057	269.544	332.507	867.804	423.109	469.189	513.97	842.438	310.381	731.507	363.909	590.278	478.935	312.864	507.499	864.936	383.532	423.305	345.177	537.55	175.122	838.533	323.097	630.276
0.649351		327.138	1494.98	101.678	507.568	473.773	591.906	195.114	501.741	357.649	1032.37	213.6	380.5	120.457	227.21	361.456	236.511	156.673	251.2	226.946	720.775	307.568	369.592	369.642	629.57	228.401	599.206	262.074	484.416	319.126	255.297	323.796	647.75	267.416	332.629	254.731	358.786	151.901	775.284	221.485	467.857
0.714286		246.548	1246.02	124.366	411.451	406.697	492.105	156.318	415.197	259.725	824.208	160.2	295.5	96.164	129.97	273.978	166.977	126.303	205.041	168.528	583.563	282.97	265.823	239.054	437.707	180.405	511.38	223.526	365.506	247.549	196.363	246.995	556.322	199.721	257.773	164.704	299.321	133.305	522.263	159.775	348.686
0.779221		231.129	1063.54	137.242	285.775	359.712	352.183	147.773	264.909	182.895	671.313	150.1	184.9	82.644	108.57	174.432	200.163	111.012	165.427	147.942	571.31	179.333	218.738	218.689	345.717	162.788	404.937	149.6	295.24	213.661	223.503	217.984	492.012	147.859	223.681	118.586	230.66	105.548	427.267	104.08	243.137
0.844156		212.328	860.786	114.461	261.631	308.577	353.291	125.046	194.891	180.56	516.525	90.533	124.633	96.514	83.042	148.571	150.717	113.882	133.186	116.047	451.977	148.912	174.627	119.571	253.499	146.717	279.013	175.171	238.629	143.594	149.85	142.069	442.977	119.364	202.591	110.892	170.939	102.922	309.222	90.592	173.195
0.909091		172.57	720.671	125.816	204.843	248.589	327.654	103.987	128.747	159.678	392.699	57.1	94.8	22.071	106.774	119.201	96.253	84.021	88.431	79.496	380.772	109.568	154.455	90.812	165.896	114.929	276.692	142.944	150.339	81.595	110.197	99.946	360.525	97.632	178.783	73.802	134.211	94.755	286.584	87.283	113.79
0.974026		130.72	623.361	122.156	147.897	209.894	266.987	104.172	125.356	171.102	328.331	44.933	95.5	27.214	90.542	91.676	46.51	45.739	87.773	90.107	332.598	63.031	53.272	83.263	119.754	75.697	236.472	102.277	127.853	90.874	55.354	90.105	295.29	71.282	181.898	84.868	109.536	66.092	257.245	13.746	89.718
1.03896		103.371	573.842	70.593	81.14	198.627	185.337	98.905	131.83	131.843	255.044	19.2	65.833	47.618	54.221	17.726	87.659	44.075	75.07	106.718	270.566	100.096	54.397	75.055	110.414	56.183	143.598	92.034	131.896	81.018	76.135	94.847	302.561	72.394	136.787	34.261	84.52	60.95	236.647	52.023	45.414
1.1039		63.847	483.603	73.294	93.716	221.49	175.159	69.943	121.031	119.189	239.826	17.6	49.3	33.324	29.985	34.999	48.708	32.314	82.732	45.684	239.854	92.896	58.383	69.731	78.195	68.564	128.606	56.68	101.88	42.553	83.778	97.816	209.272	55.725	104.153	27.812	65.805	68.839	219.97	21.384	57.362
1.16883		55.359	425.066	68.398	79.514	140.799	189.858	71.034	53.841	115.697	195.927	11.9	51.267	1.957	0	66.261	8.744	54.861	70.394	39.318	203.759	81.612	57.743	76.503	79.92	40.018	115.848	51.582	100.333	44.621	69.464	57.903	161.778	29.26	79.252	67.846	65.164	39.884	150.281	17.681	19.54
1.23377		46.119	354.575	38.487	55.463	95.269	145.593	64.413	34.961	105.87	155.137	3.733	84.167	0	43.694	37.402	3.302	42.612	27.383	29.399	173.064	51.001	25.941	57.187	53.291	16.834	145.25	48.494	90.141	22.155	32.956	61.89	168.97	30.998	52.13	64.025	6.82	35.341	146.705	18.38	27.924
1.2987		25.556	318.389	43.803	56.962	102.791	88.139	82.221	50.503	81.798	96.661	6.6	0	11.481	43.797	0	15.67	20.024	11.672	27.84	170.381	25.457	8.055	35.021	31.212	39.119	82.022	16.261	31.04	12.896	13.859	50.71	113.04	25.797	50.663	30.362	0	1.688	134.339	11.549	12.297
1.36364		37.529	273.854	37.471	54.879	108.849	57.194	41.59	52.913	76.23	76.278	18.133	0.767	7.287	27.323	4.678	37.335	11.176	0	32.698	118.292	0	10.839	12.244	1.507	49.044	96.891	41.083	18.371	12.693	0	26.924	88.876	0	0	25.073	11.151	0	108.499	0	6.635
1.42857		27.957	228.577	66.609	12.777	113.644	86.613	10.349	31.429	54.303	71.607	2	15.733	10.353	2.634	19.186	0	31.256	15.258	5.859	92.507	15.225	9.134	12.393	0	33.323	91.017	21.56	0	0	22.594	7.811	0	23.815	8.99	6.933	12.209	31.728	75.553	17.089	18.313
1.49351		10.833	187.941	62.31	0	48.235	94.645	17.033	0	60.322	54.102	0	39.9	29.643	14.482	29.897	34.579	14.422	6.009	9.342	115.413	52.151	0	31.048	9.448	25.213	45.827	29.696	10.955	19.099	28.242	0	31.623	10.39	8.864	0	24.571	20.593	6.403	23.683	0
