# Supplementary material for: Cell cycle-specific loading of condensin I is regulated by the N-terminal tail of its kleisin subunit
Source: eLife. 2022 Dec 13;11:e84694. doi: 10.7554/eLife.84694 (PMC9797191; doi:10.7554/eLife.84694)
Supplement: Figure 1—figure supplement 2—source data 2. [file elife-84694-fig1-figsupp2-data2.xlsx]

## Sheet: Figure 1-figure supplement 2C
Figure 1-figure supplement 2-source data 2
Figure 1-figure supplement 2C
Raw DAPI area and mSMC4 intensity values
		35 nM holo(WT)_30 min					35 nM holo(WT)_150 min
		DAPI (overall)	mSMC4 (overall)				DAPI (overall)	mSMC4 (overall)
Chromosome cluster					Chromosome cluster
1		136307	603840347		1		60485	382310950
2		171701	490926585		2		83821	386985964
3		110392	508560163		3		96268	527215382
4		172693	583807885		4		95446	409431098
5		171655	577835637		5		74110	403864699
6		135686	512087701		6		74134	403955337
7		133290	559280718		7		100501	357593824
8		162296	591204820		8		72588	412616272
9		156831	531299870		9		52084	198843733
10		157361	598832771		10		76247	477815675
		35 nM holo(H-dN)_30 min					35 nM holo(H-dN)_150 min
		DAPI (overall)	mSMC4 (overall)				DAPI (overall)	mSMC4 (overall)
Chromosome cluster					Chromosome cluster
1		135412	1290510167		1		90736	817676257
2		135101	1115081187		2		96137	1075716070
3		124615	992939062		3		104137	755525873
4		134226	1322712004		4		130625	1399837871
5		108995	1180658842		5		114873	1570781592
6		136481	1345929794		6		107875	1495316242
7		134361	1373771322		7		132505	1726463525
8		126004	1073435695		8		90272	1222621246
9		128739	1226546670		9		125691	1860691477
10		127914	1041360777		10		74501	589610666
		35 nM holo(H-dCH)_30 min					35 nM holo(H-dCH)_150 min
		DAPI (overall)	mSMC4 (overall)				DAPI (overall)	mSMC4 (overall)
Chromosome cluster					Chromosome cluster
1		156383	1832322354		1		120879	2810045415
2		115746	1327328397		2		84777	1466880210
3		133904	1164047853		3		96689	1847665953
4		122151	1382162096		4		136567	1940564096
5		163363	1316379594		5		117804	2096951612
6		187806	1175877776		6		60195	778341053
7		148045	1731459290		7		110100	1810434559
8		148791	1567309736		8		102435	1406691933
9		103535	1281325095		9		134026	2625133320
10		137448	1473690628		10		128513	1912480209
		35 nM holo(H-crCH)_30 min					35 nM holo(H-crCH)_150 min
		DAPI (overall)	mSMC4 (overall)				DAPI (overall)	mSMC4 (overall)
Chromosome cluster					Chromosome cluster
1		136693	1434030319		1		146355	2616872097
2		142612	1327397061		2		88319	1415056008
3		128224	1323163861		3		107756	1928464519
4		142741	1320752574		4		110766	1961348244
5		154356	1224575044		5		111947	1807507546
6		118115	932817296		6		105014	1643409529
7		146004	1225434920		7		137785	2210966907
8		130041	1139104396		8		132381	2193083652
9		134207	1188899685		9		73783	1067189469
10		117605	1165212769		10		75875	891723464
