# Supplementary material for: Cell cycle-specific loading of condensin I is regulated by the N-terminal tail of its kleisin subunit
Source: eLife. 2022 Dec 13;11:e84694. doi: 10.7554/eLife.84694 (PMC9797191; doi:10.7554/eLife.84694)
Supplement: Figure 1—source data 1. [file elife-84694-fig1-data1.xlsx]

## Sheet: Figure 1C
Figure 1-source data 1
Figure 1C
Raw DAPI area and mSMC4 intensity values
		35 nM holo(WT)_30 min					35 nM holo(WT)_150 min
		DAPI (overall)	mSMC4 (overall)				DAPI (overall)	mSMC4 (overall)
Chromosome cluster					Chromosome cluster
1		196970	328277488		1		127575	599688500
2		167150	468284196		2		130409	326686272
3		197975	184962460		3		101454	301295896
4		201804	202537908		4		108035	600536416
5		159298	243070583		5		118035	412328512
6		180586	614663924		6		98221	579662200
7		176624	399316008		7		97219	401561143
8		184918	488493913		8		92039	428492746
9		219148	500068278		9		92905	311994708
10		199978	513007652		10		135867	565431916
		17.5 nM holo(WT)_30 min					17.5 nM holo(WT)_150 min
		DAPI (overall)	mSMC4 (overall)				DAPI (overall)	mSMC4 (overall)
Chromosome cluster					Chromosome cluster
1		144715	3626324		1		63485	20432831
2		195849	9517977		2		82549	58612851
3		246077	9244225		3		121732	36610705
4		211691	10490110		4		115523	215838436
5		221619	36220851		5		88138	58232883
6		145872	10538596		6		164681	356354594
7		206349	15052814		7		101545	73604818
8		212341	7351123		8		135622	150061101
9		260143	12744488		9		90544	200461455
10		225779	11690845		10		31751	91493007
		8.8 nM holo(WT)_30 min					8.8 nM holo(WT)_150 min
		DAPI (overall)	mSMC4 (overall)				DAPI (overall)	mSMC4 (overall)
Chromosome cluster					Chromosome cluster
1		280978	4708038		1		280246	3733026
2		224056	22632389		2		129709	7626697
3		258244	5729913		3		190824	55516951
4		99271	2331290		4		113177	24839204
5		220527	3059766		5		108040	25282599
6		184959	1982888		6		163783	20526220
7		75904	1283403		7		90071	21711036
8		143399	1888034		8		103105	15709405
9		176535	63951825		9		140188	95856992
10		159364	7824722		10		73541	28258348
		4.4 nM holo(WT)_30 min					4.4 nM holo(WT)_150 min
		DAPI (overall)	mSMC4 (overall)				DAPI (overall)	mSMC4 (overall)
Chromosome cluster					Chromosome cluster
1		85423	176422		1		63768	1584195
2		97278	457586		2		50447	363876
3		53023	655134		3		12022	153838
4		239367	478554		4		142915	3645598
5		146868	156012		5		114937	2971433
6		44873	195602		6		138785	1261030
7		49850	176538		7		263803	4571829
8		84442	0		8		140337	3260694
9		319639	928311		9		76402	1264056
10		105459	335822		10		258517	5001819
		35 nM holo(H-dN)_30 min					35 nM holo(H-dN)_150 min
		DAPI (overall)	mSMC4 (overall)				DAPI (overall)	mSMC4 (overall)
Chromosome cluster					Chromosome cluster
1		77757	640649870		1		133982	1775384300
2		106837	1081073627		2		45530	350142145
3		154286	1051490044		3		123032	1388217032
4		145438	1080466767		4		65533	605155958
5		168078	1247008349		5		108097	953617498
6		142396	1088505756		6		121755	1195031067
7		134633	1037840036		7		95995	1059285565
8		133069	1052275181		8		77482	987164537
9		112243	985356024		9		95173	722273966
10		105040	961270058		10		112002	1335342934
		17.5 nM holo(H-dN)_30 min					17.5 nM holo(H-dN)_150 min
		DAPI (overall)	mSMC4 (overall)				DAPI (overall)	mSMC4 (overall)
Chromosome cluster					Chromosome cluster
1		158973	261572581		1		27747	87982401
2		105637	121032137		2		35490	101638557
3		184876	365212049		3		83465	743574722
4		96863	122803902		4		105171	460005135
5		110599	387081224		5		75243	417025842
6		161496	415465369		6		61530	323948996
7		127033	300610280		7		85980	257922656
8		186393	337601587		8		59179	284634085
9		131114	362613122		9		94202	464686881
10		112491	400353866		10		47851	189509857
		8.8 nM holo(H-dN)_30 min					8.8 nM holo(H-dN)_150 min
		DAPI (overall)	mSMC4 (overall)				DAPI (overall)	mSMC4 (overall)
Chromosome cluster					Chromosome cluster
1		221735	18179360		1		98447	107045741
2		228338	31932268		2		37071	39488429
3		163834	253780143		3		107812	69754420
4		161732	218024839		4		81530	48506304
5		156262	157125156		5		66743	35830312
6		119058	58734568		6		122889	125362935
7		148564	111550741		7		53270	106093112
8		143739	163023007		8		60988	97526583
9		136045	132003782		9		85042	118648999
10		173870	43985813		10		96985	140230849
		4.4 nM holo(H-dN)_30 min					4.4 nM holo(H-dN)_150 min
		DAPI (overall)	mSMC4 (overall)				DAPI (overall)	mSMC4 (overall)
Chromosome cluster					Chromosome cluster
1		186467	2961878		1		115327	9178326
2		185215	27150986		2		74618	43377636
3		203505	5877958		3		83513	40578375
4		191053	9203938		4		141724	57669669
5		161726	2659492		5		77146	15987167
6		166941	4093320		6		71475	37186535
7		191819	2958996		7		144878	27701770
8		247912	2224257		8		101503	34772679
9		246124	2031292		9		103462	13256182
10		195025	5052086		10		109952	76830577
