# Supplementary material for: Cell cycle-specific loading of condensin I is regulated by the N-terminal tail of its kleisin subunit
Source: eLife. 2022 Dec 13;11:e84694. doi: 10.7554/eLife.84694 (PMC9797191; doi:10.7554/eLife.84694)
Supplement: Figure 1—source data 2. [file elife-84694-fig1-data2.xlsx]

## Sheet: 35nM holo(WT)
Figure 1-source data 2
Figure 1D
Non-normalized values
	35 nM holo(WT)_150 min
Chromosome sample		1		2		3		4		5		6		7		8		9		10		11		12		13		14		15		16		17		18		19		20
		DAPI	mSMC4	DAPI	mSMC4	DAPI	mSMC4	DAPI	mSMC4	DAPI	mSMC4	DAPI	mSMC4	DAPI	mSMC4	DAPI	mSMC4	DAPI	mSMC4	DAPI	mSMC4	DAPI	mSMC4	DAPI	mSMC4	DAPI	mSMC4	DAPI	mSMC4	DAPI	mSMC4	DAPI	mSMC4	DAPI	mSMC4	DAPI	mSMC4	DAPI	mSMC4	DAPI	mSMC4
Distance (µm)
-1.49351		0	126.9	143.859	129.672	462.133	325.818	0	36.812	0	36.841	1507.69	573.51	472.868	51.22	860.675	278.746	0	58.188	133.369	0	0	0	0	0	0	12.322	0	36.072	287.622	0	0	0	0	4.094	162.867	0	0	19.246	0	0
-1.42857		54.301	118.258	236.847	186.348	564.805	338.385	4	75.031	35.022	34.252	1855.88	565.568	534.549	89.718	889.417	282.796	26.562	93.719	128.872	32.524	47.405	45.537	87.64	22.926	28.842	39.416	109.021	0	422.618	20.352	59.018	20.888	84.513	118.721	236.233	102.17	153.628	0	250.122	72.378
-1.36364		56.973	166.863	208.703	271.25	652.496	235.875	98.437	0	48.635	24.054	2118.2	594.095	607.685	106.184	937.191	228.572	122.312	82	318.954	38.36	109.824	130.884	185.032	96.982	34.269	0	286.621	75.317	572.056	8.086	139.781	28.73	135.59	128.922	366.96	125.932	256.513	43.186	520.96	121.516
-1.2987		140.316	91.171	318.945	247.324	756.503	193.474	225.687	11.594	67.934	50.222	2708.39	669.528	753.838	85.907	977.04	217.941	162.594	130.094	519.891	43.444	183.795	189.857	260.913	99.74	156.115	37.334	424.556	51.98	733.099	160.355	221.902	50.38	228.001	147.873	589.177	198.226	369.481	55.497	859.56	114.4
-1.23377		180.89	54.079	360.859	297.422	958.951	323.191	346.125	173.625	190.595	83.302	2797.98	619.022	999.877	208.187	1062.69	265.898	270	169.438	700.804	36.85	290.249	171.743	286.17	180.969	176.333	46.238	637.663	86.875	920.336	77.23	316.014	107.006	387.778	174.135	856.058	261.266	534.288	31.057	1188.03	141.258
-1.16883		242.087	154.717	496.269	451.09	1028.78	273.308	494.875	2.656	298.371	136.42	3182.24	703.869	1217.79	176.31	1280.22	258.623	382.281	234.188	963.288	96.909	356.971	145.1	409.12	181.48	396.451	37.057	940.34	105.223	1065.01	88.208	483.403	126.193	466.473	199.548	982.102	250.976	810.813	115.694	1476.43	238.633
-1.1039		339.918	138.53	699.14	350.5	1318.68	461.477	710.5	73.062	449.818	134.48	3562.57	768.379	1590.12	243.764	1518.41	285.885	616.688	307.25	1326.05	152.548	502.101	217.663	546.801	234.702	571.374	82.379	1191.58	184.975	1270.66	152.993	641.651	194.381	645.977	267.408	1344.32	310.474	1020.69	102.656	1861.56	233.4
-1.03896		392.5	118.712	867.746	493.133	1466.95	485.225	817.219	81.344	637.774	152.611	3966.46	883.699	1915.22	350.341	1686.48	278.133	689.844	255.25	1847.53	182.38	694.7	278.445	831.682	429.23	717.447	154.65	1579.41	51.46	1559.3	218.707	801.885	105.443	943.702	192.524	1543.8	352.785	1297.52	119.46	2281.04	323.124
-0.974026		625.783	192.79	1010.48	456.234	1707.06	440.787	887.5	33.187	825.064	188.539	4266.85	924.739	2455.31	401.458	1823.54	284.615	953.25	237.938	2129.18	169.526	877.103	269.343	817.825	511.627	977.008	89.552	1932.55	94.504	1920.27	191.035	1041.72	250.364	1117.62	229.604	1777.34	400.27	1726.7	166.189	2646.4	442.831
-0.909091		873.27	172.834	1118.86	465.023	1938.62	548.06	1014.91	67.156	1110.35	232.16	4708.88	1003.44	2629.43	522.864	2176.36	293.921	1099.75	263.688	2312.94	302.108	1088.42	269.829	900.186	475.732	1160.4	159.666	2328.91	142.492	2331.02	277.614	1227.64	291.473	1361.7	373.659	2006	401.432	2186.24	219.955	3076.36	542.98
-0.844156		1202.47	251.366	1511.95	465	2268.83	589.66	1218.5	156.031	1523.65	242.882	5188.77	1059.69	2822.88	636.135	2371.1	412.8	1387.94	375.25	2781.06	460.771	1320.34	352.063	1039.76	607.492	1436.53	145.515	2678.9	157.887	2453.26	289.617	1553.99	249.572	1662.91	417.449	2397.82	415.134	2801.37	175.295	3552.61	716.298
-0.779221		1674.7	304.039	1767.86	566.797	2441.98	629.799	1367.31	226.968	1994.48	319.199	5789.65	1173.86	3202.94	735.835	2684.15	468.162	1704.25	382.562	3289.85	495.578	1682.55	353.266	1178.06	729.344	1727.64	177.557	3150.61	287.727	2870.46	354.142	1834.34	341.751	2069.49	371.96	2721.49	504.749	3384.56	275.004	4193.15	885.818
-0.714286		2324.34	381.489	2133.11	672.797	2654.9	644.876	1732.38	71.218	2578.92	392.894	6625.39	1310.23	3537.45	789.107	2944.31	490.68	1857.12	407	3797.73	604.698	2095.36	386.428	1405.79	814.218	2182.21	235.018	3872.38	196.944	3257.15	458.539	2195.22	487.977	2410.39	416.83	2896.93	613.838	3883.48	486.662	4869	1001.48
-0.649351		2786.85	421.161	2304.75	736.805	2963.64	580.054	2002.31	197.906	3062.73	519.425	7417.04	1473.98	3949.46	897.683	3378.53	553.725	2197.91	577.25	4278.22	741.938	2585.3	457.36	1704.96	930.681	2680.76	261.182	4606.02	263.273	3649.86	555.035	2502.72	595.015	2707.33	527.846	3117.11	679.62	4470.4	573.178	5567.25	1177.91
-0.584416		3273.06	580.9	2679.22	1027.62	3309.81	725.135	2394.69	344.468	3708.06	723.639	7955.56	1560.88	4542.18	1100.96	3699.55	780.097	2620.5	665	4872.32	1047.45	2893.35	555.264	2192.27	1040.1	3184.69	372.87	5359.8	394.267	4110.42	796.827	2979.73	864.818	3213.22	597.003	3529.75	726.256	5147.23	650.666	6274.8	1655.92
-0.519481		4109.56	723.079	3130.89	1342.14	3645.73	883.811	2741.75	474.031	4272.89	914.376	8337.87	1793.03	5107.44	1439.6	4042.2	927.112	2776.56	849.719	5287.72	1343.48	3441.57	648.951	2701.1	1330.08	3782.97	465.193	6105.35	554.06	4395.28	992.805	3477.95	1372.49	3714.1	626.543	4042.53	840.189	5786.12	826.804	7141.54	2326.6
-0.454545		4932.77	937.994	3644.17	1658.8	3945.86	1039.01	3112.38	838.094	5347.56	1263.16	8967.58	2271.82	5679.98	2014.46	4383.68	1004.77	3413.75	1410.94	5722.8	1820.66	3852.6	814.335	3294.99	1866.1	4145.7	662.212	6952	783.539	4852.21	1227.6	4064.47	1800.61	4279.88	798.324	4396.55	1020.82	6422.6	1021.9	8115.31	3263.67
-0.38961		5674.69	1295.77	4047.47	2047.45	4362.41	1311.06	3501.06	1162.66	6403.6	1728.17	9607.92	3174.94	6462.08	2860.51	4691.68	1138.43	3560.06	1606.34	6264.7	2507.34	4227.77	1234.44	4166.56	2438.26	4604.47	852.416	7886.96	995.911	5427.15	1643.05	4833.01	2322.29	4861.68	1353.95	4995.31	1453.09	7240.67	1285.67	8618.78	4441.96
-0.324675		6398.66	1936.68	4483.94	2590.75	4852.5	1729.7	3785.56	1626.84	7139.53	2301.68	10083.8	4266.35	7333.03	4277.46	5030.1	1738.79	3794.88	2779	6742.79	3605.97	4680.11	1839.71	5239.22	3105.54	5230.41	1342.12	8468.4	1278.18	5936.31	2593.72	5513.6	2908.07	5405.39	2152.89	5677.4	2578.69	7993.9	1587.42	9439.4	5719.24
-0.25974		7010.62	3400.6	4796	3551.71	5036.13	2567.79	4057.22	1756.28	8106.79	3416.3	11234	5398.91	7825.75	6710.12	5347.82	2799.59	4045.88	4560.22	7055.27	5137.42	5210.25	2594.74	6109.97	4297.09	5738.85	2193.16	9123.07	1680.45	6366.5	4293.27	6503.36	4392.35	5782.68	3728.51	6513.02	4697.65	8599.68	2750.61	10318.5	7070.48
-0.194805		7517.39	5940.32	5263.86	4875.89	5348.07	4024.77	4212.62	2150.81	8629.28	5212.84	12002.1	6579.13	8160.12	10803.8	5912.89	4044.41	4263.5	7628.69	7299.87	7013.3	5761.02	3816.55	7097.38	6167.88	6229.33	3515.85	9461.67	2715.23	6794.42	6472.18	6900.1	7223.06	6186.85	5618.98	7657.13	7147.73	9495.63	4793.46	11236	8477.43
-0.12987		8286.25	8245.71	5593.35	6606.69	5649.7	6119.44	4445.47	3078.66	9629.62	7589.81	12552.4	8038.36	8516.9	15202.8	6453.1	5251.06	4515.59	10454.4	7593.7	8617.28	6169.65	5084.61	8163.78	9061.95	6631.4	4625.87	9782.03	4663.16	7243.4	8879.59	7536.79	11496.2	6474.25	8121.84	8901.49	9506.01	10177.2	7166.71	12612.4	9702.02
-0.0649351		8788.59	9988.19	6067.78	7860.69	6010.66	7714.19	4488.75	4156.38	10358.4	10217.8	13024.7	9077.86	8885.17	17914.7	6661.8	6157.97	4676.31	12960.8	7680.53	10115.9	6438.52	5783.57	8883.92	11522.9	6932.22	5625.98	10043.4	6915.48	7768.14	10472.9	8152.77	15583.6	6784.49	9658.29	9890.95	11236.2	10889.8	9098.69	13421.2	10801.5
0		8953.81	10187.8	6195.5	8097.59	6289.59	8572.02	4784.41	5180.91	10580.1	11254.1	13171.6	9296.97	9287.55	18316.7	6672.5	6410.33	4769.53	13150	7943.24	10760	6757.88	5866.42	9203.25	13177.1	7330.81	5982.11	10110.5	8355.4	8166.17	11040.6	8312.94	16599.4	6943.21	9932.25	10142.3	11904.6	11386	9308.47	13860.1	11267
0.0649351		8472.71	9370.44	5986.05	7122.34	6164.74	7909.27	4590.88	5080.84	10335.7	9914.12	12042.5	8263.2	8860.92	14662.5	6339.12	5815.37	4666.75	11990.5	7673.78	10401.9	6746.06	5387.1	9157.01	12900.3	7143.26	5751.04	10087	8245.31	8100.54	10707.8	7892.22	15056.2	6889.67	8618.01	9380.55	11712.7	11266	7893.42	13690.4	10518.5
0.12987		7727.42	7315.89	5845.71	5280.17	5707.77	6532.41	4441.59	4242.66	9442.71	7190.16	10821.2	6266.35	8183.21	10142.7	5720.02	4710.23	4607.44	10404.9	7407.64	9536.92	6598.49	4277.56	8278.33	11440.2	6658.9	5095.67	9955.41	6418.51	7761.85	8732.61	7424.09	12434.5	6762.73	6352.99	8393.51	10681.8	10508.9	5925.64	13299.9	8022.69
0.194805		6921.67	5617.2	5503.19	3679.25	5437.07	5054.33	4363.06	3335.44	8465.55	4514.86	9733.98	5340.41	7607.6	6248.41	5202.09	3325.51	4525.06	8784.38	7175.4	8075.81	6539.92	3171.7	7115.3	9654.53	6332.02	4325.6	9609.11	4272.65	7121.52	6455.99	6853.7	10045.9	6646.16	4058.03	7471.09	8808.58	9718.72	4271.33	12531.6	5447.83
0.25974		5948.97	4003.16	5162.8	2287.19	4915.81	3938.39	4245.69	2638.41	7526.29	2740.88	8401.23	4836.01	6909.23	4391.13	4634.63	2217.06	4357.03	6513.22	6720.68	6242.54	6496.28	2336.49	5812.68	7800.4	5812.85	3040.99	9294.28	2570.33	6456.38	4402.66	6309.95	8390.73	6199.01	2590.29	6378.8	6511.74	8747.48	2995.31	11470	3676.34
0.324675		5019	2674.34	4607.36	1460.28	4462.9	2961.75	4141.38	2297.66	6547.4	1841.4	7410.62	4104.94	6348.51	3416.7	4217.39	1630.38	3842.38	4246.56	6255.06	4928.59	6391.03	1737.98	5013.02	5915.71	5273.99	2234.48	8659.45	1796.2	5813.18	2834.72	5775.47	6710.69	5536.91	1686.75	5332.91	4160.43	7597.16	1648.29	10240	2550.19
0.38961		4205.62	1544.42	4303.59	1028.6	4081.65	2341.5	3802.66	1869.91	5665.76	1396.95	6498.65	3191.09	5523.8	2617.15	3994.1	1397.37	3716.16	2511.62	5737.13	3924.54	5836.28	1391.94	4503.94	4742.09	4826.03	1385.38	7967.65	1456.11	5220.98	1771.79	5128.61	4788.95	4801.94	1129.24	4546.08	2425.85	6426.27	835.229	8980.86	2083.04
0.454545		3661.17	1054.11	3729.56	812.75	3779.2	1930.63	3623.94	1601.09	5152.94	1137.41	5830.38	1886.85	4925.24	1912.34	3755.76	1155.89	3206	1499.25	5079.76	3354.97	5198.32	1096.29	4160.02	3616.47	4327.18	906.408	7201.6	1178.78	4705.14	1131.02	4530.09	3036.23	4292.54	820.03	4060.29	1487.48	5539.35	641.35	8047.16	1712.16
0.519481		3345.01	720.671	3313.47	657.156	3423.13	1386.9	3226.62	1193.16	4741.56	823.854	5202.12	1185.61	4284.72	1221.65	3397.52	811.9	2972.25	1129.84	4611.99	2885.28	4820.83	1001.27	3618.72	2693.23	3766.21	620.104	6495.44	983.77	4011.48	778.598	4030.03	1724.61	3821.83	671.628	3631.31	1099.46	4802.53	536.72	6933.84	1391.39
0.584416		3043.05	508.097	2903.3	534.516	3088.94	1011.47	2982.5	723.718	4230.07	634.586	4654.37	997.306	3702.15	843.328	3124.74	530.5	2780	908.062	4129.67	2526.37	4390.37	913.57	3236.85	2063	3315.5	472.88	5677.74	786.077	3449.75	487.083	3496.8	1021.38	3605.37	628.142	3016.61	903.643	4241.64	429.019	6111.67	1067.55
0.649351		2714.71	377.59	2508.32	398.613	2749.72	697.888	2754.19	514.781	3828.48	509.191	4102.21	697.235	3304.14	649.05	2783.62	402.512	2573.06	741.438	3829.53	2055.91	4123.13	824.624	2762.88	1657.31	2962.09	387.478	5083.37	606.991	2941.34	453.035	3220.41	710.143	3223.69	662.465	2509.18	747.562	3510.28	317.69	5603.54	916.78
0.714286		2342.95	298.977	2210.23	431.25	2346.86	364.444	2362	450	3303.36	334.012	3692	525.521	2793	518.515	2471.95	344.236	2074.12	703.875	3080.01	1671.34	3838.89	698.017	2475.45	1349.04	2577.18	306.383	4646.77	477.956	2487.02	366.417	2946.15	583.61	2907.22	526.901	2055.27	655.661	3008.56	216.004	5014.36	844.369
0.779221		1952.5	206.212	1913.28	260.039	1935.1	242.172	1982.78	386.594	2852.8	427.663	3208.01	424.196	2325.28	453.063	2153.6	285.069	1768.47	552.969	2565.76	1441.17	3419.23	619.557	2121.74	1063.97	2210.34	267.545	3946.35	459.497	1972.57	242.027	2364.92	504.63	2512.61	481.779	1673.34	608.37	2616.3	253.877	4496.66	753.327
0.844156		1644.29	124.831	1651.86	290.484	1539.27	236.674	1779.12	487.344	2312.03	366.882	2690.81	394.376	2012.51	311.194	1829.18	232.113	1559.88	468	2054.18	1169.77	3033.77	568.085	2035.68	776.589	1860.88	268.763	3532.51	368.138	1742.34	152.621	2103.63	330.632	2126.92	436.462	1383.81	549.143	2097.31	246.883	4205.84	727.08
0.909091		1451.06	184.039	1292.93	274.203	1284.11	346.687	1373.41	455.656	1663.48	265.423	2130.57	397.329	1656.38	262.544	1518.58	277.671	1358.12	321.094	1623.56	941.762	2692.58	532.515	1730.74	666.846	1435.59	230.072	3103.9	393.183	1466.4	148.15	1757.93	285.258	1835.75	341.181	1111.2	486.324	1759.87	184.588	3860.61	630.72
0.974026		1147.7	84.161	1016.31	271.312	1077.77	239.551	1156.56	177.5	1369.87	223.722	1516.03	325.888	1201.08	190.989	1256.85	243.932	1166.25	268.25	1316.07	683.362	2206.67	421.923	1509.44	706.732	1286.07	185.297	2731.95	339.439	1222.1	161.435	1477.47	311.008	1538.07	311.952	870.108	391.402	1472.6	176.537	3470.25	622.724
1.03896		1018.85	48.426	758.308	263.18	753.941	85.604	978.906	369.344	1078.66	244.962	1155.02	173.643	847.183	211.876	982.101	136.309	896.125	144.906	983.882	573.233	1694.76	340.594	1328.02	479.934	993.181	122.971	2341.77	314.896	973.936	105.961	1149.35	301.902	1312.56	375.856	639.346	297.969	1018.63	227.809	3038.36	581.48
1.1039		809.784	65.521	565.547	166.094	508.805	89.885	679.5	182.218	802.113	136.74	880.316	228.009	558.231	105.252	832.332	118.089	687.25	224.25	799.314	509.404	1408.51	297.733	1104.73	410.165	862.338	135.431	1970.97	255.87	790.688	98.544	923.979	192.138	1194.65	281.573	495.821	233.973	722.892	178.308	2715.36	490.836
1.16883		519.806	109.186	376.976	74.293	414.965	49.332	507.969	249.656	605.01	133.949	694.265	206.199	407.916	146.25	718.334	94.537	536.562	152	722.025	402.756	1114.24	303.45	975.633	387.178	706.404	152.666	1682.46	189.493	587.477	60.313	654.592	167.582	1017.2	120.802	335.233	214.083	506.067	82.739	2394.71	499.78
1.23377		322.5	71.4	268.781	0	297.25	0	339.813	76.531	355.339	82.811	484.652	177.721	236.784	68.308	628.073	59.449	424.125	130.875	508.79	271.52	910.49	290.98	780.582	348.617	651.152	153.111	1439.7	107.702	367.941	54.749	592.544	167.338	796.593	63.15	260.833	240.332	341.898	82.189	1971.44	503.56
1.2987		158.224	25.304	161.242	77.055	154.74	34.273	283.563	92.968	299.182	56.968	263.251	141.485	165.639	21.724	444.617	68.539	329.812	122.812	218.504	208.25	789.356	239.325	661.982	362.552	566.896	74.146	1143.59	126.558	266.075	73.075	381.567	182.127	561.819	133.73	165.26	185.435	322.095	104.388	1689.66	500.784
1.36364		111.334	18.651	81.859	135.953	51.709	97.644	177.125	23.156	193.231	56.509	141.748	46.012	31.408	22.304	228.045	74.361	314.875	82.938	121.204	114.858	748.649	212.469	549.947	388.37	449.519	183.544	907.111	106.731	156.176	74.35	225.855	106.521	367.479	18.091	74.515	141.817	151.212	79.509	1447.69	541.591
1.42857		63.097	23.931	65.332	92.871	0	79.894	127.031	109.906	28.395	26.767	74.109	0	13.558	0	85.475	22.772	259.5	2.156	53.901	85.13	633.409	157.979	474.932	318.04	405.56	147.932	892.985	83.423	110.645	13.472	156.866	16.87	232.677	0	51.833	80.076	27.976	40.86	1301.2	488.78
1.49351		22.582	0	0	51.188	29.031	31.212	127.375	90.531	15.442	0	0	75.452	0	10.384	0	0	212.188	0	0	108	446.32	113.034	507.077	329.486	383.116	94.579	645.778	135.948	0	32.389	104.539	66.485	113.306	62.563	0	100.912	142.497	96.339	1079.84	348.858

## Sheet: 17.5 nM holo(WT)
Figure 1-source data 2
Figure 1D
Non-normalized values
	17.5 nM holo(WT)_150 min
Chromosome sample		1		2		3		4		5		6		7		8		9		10		11		12		13		14		15		16		17		18		19		20
		DAPI	mSMC4	DAPI	mSMC4	DAPI	mSMC4	DAPI	mSMC4	DAPI	mSMC4	DAPI	mSMC4	DAPI	mSMC4	DAPI	mSMC4	DAPI	mSMC4	DAPI	mSMC4	DAPI	mSMC4	DAPI	mSMC4	DAPI	mSMC4	DAPI	mSMC4	DAPI	mSMC4	DAPI	mSMC4	DAPI	mSMC4	DAPI	mSMC4	DAPI	mSMC4	DAPI	mSMC4
Distance (µm)
-1.49351		0	43.212	0	41.861	0	66.925	1277.83	64.357	261.853	27.221	0	7.333	328.474	101.368	161.883	62.897	1450.72	78.164	0	106.907	1875.02	152.754	0	0	76.915	121.153	0	89.33	0	61.835	190.031	0	0	7.017	703.14	329.645	273.649	147.912	0	82.765
-1.42857		7.486	26.591	293.64	18.932	334.809	0	1494.82	114.125	370.933	33.053	125.877	0	475.658	0	228.815	48.332	1729.16	51.722	203.507	0	2291.39	22.055	126.447	179.087	246.089	121.566	209.597	0	57.111	40.992	381.215	43.251	355.747	0	931.275	372.455	404.982	64.972	60.118	109.765
-1.36364		125.541	39.312	586.26	0	572.183	48.864	1653.19	144.683	433.291	0	328.285	90.717	688.29	76.078	325.727	0	1959.93	147.598	576.874	120.283	2838.61	86.549	331.943	203.368	427.328	92.758	513.637	15.8	170.847	17.482	489.526	100.405	438.848	30.793	1035.84	320.75	658.961	101.758	367.236	107.471
-1.2987		220.839	98.354	916.946	115.926	792.283	75.779	1851.72	166.66	723.073	27.684	625.518	46.817	1040.92	135.894	573.678	45.194	2134.07	112	694.337	168.361	3356.78	85.244	505.646	258.316	464.834	73.783	864.958	172.231	218.011	0	638.983	19.946	699.831	14.865	1307.76	426.295	908.6	144.143	492.412	0
-1.23377		304.791	80.875	1281.96	51.525	1248.72	84.687	2104.15	196.424	1066.74	61.851	959.558	14.576	1402.11	208.026	729.029	53.931	2147.8	116.125	1029.32	186.984	3797.44	76.26	840.469	204.068	563.893	85.935	1284.6	148.288	559.217	6.281	823.436	74.944	981.061	62.489	1527.12	338.77	1167.7	0	760.177	182.235
-1.16883		473.637	20.332	1469.17	122.263	1575.86	123.768	2379.01	183.924	1417.14	95.261	1223.39	42.146	1661.45	211.157	799.508	132.909	2460.36	177.772	1152.38	205.434	4087.76	203.088	923.422	261.98	815.206	54.816	1690.5	137.508	505.1	26.062	951.614	149.27	1141.43	73.285	1726.74	391.015	1411.53	161.45	1148.88	93.118
-1.1039		562.454	6.794	1785.93	188.114	1942.26	159.468	2692.05	196.376	1699.39	157.719	1295.34	22.408	1950.53	318.21	922.38	138.085	2630.06	162.133	1331.28	270.764	4400.91	153.802	1249.51	280.827	1161.84	208.321	2126.82	318.051	711.415	99.439	1099.38	229.816	1205.67	104.139	1886.28	446.605	1659.76	114.104	1244.41	197.765
-1.03896		765.972	29.177	2067.94	207.963	2239.05	156.136	3060.04	255.05	1765.95	104.048	1473.65	108.818	2115.82	271.578	992.939	137.807	2955.54	206.754	1610.98	151.679	4696.36	187.104	1626.09	286.304	1086.45	252.417	2399.73	292.174	829.992	143.524	1360.29	146.856	1480	179.487	2155.83	526.355	1844.03	138.315	1726.62	143.471
-0.974026		897.232	42.888	2178.3	173.338	2588.72	153.122	3476.89	262.451	1998.51	130.871	1670.29	58.51	2491.5	485.815	1037.94	157.008	3054.78	203.15	2029.83	48.977	4985.01	243.21	1721.67	283.08	1244.02	236.42	2851.61	312.798	885.491	175.075	1605.22	247.989	1750.6	165.515	2293.58	521.375	1967.67	43.99	2040.65	213.706
-0.909091		1150.16	51.542	2253.37	238.935	2957.09	176.84	3801.44	291.558	2277.42	142.85	1633.93	127.004	2600.61	378.947	1215.45	190.044	3247.95	246.237	2596.19	201.746	5547.95	237.802	1952.78	252.124	1555.46	296.628	3406.68	375.677	1091.94	187.342	1785.96	312.593	1926.59	163.055	2507	648.495	2442.32	165.034	2326.59	163.323
-0.844156		1603.52	94.076	2565.66	215.339	3268.74	238.363	3957.59	304.553	2559.77	216.033	1946.35	50.73	2962.16	587.342	1369.03	233.43	3429.06	413.395	2968.21	200.358	5538.35	275.928	2226.79	332.541	1727.88	357.411	3704.03	452.671	1144.02	285.523	1959.77	277.806	2274.94	176.606	2735.64	608.595	2614.46	89.384	2944.06	317.059
-0.779221		2232.56	90.377	3088.24	307.062	3683.78	314.133	4411.74	390.682	3081.72	150.036	2237.85	225.666	3322.13	711.789	1538.32	268.508	3647.08	371.52	3303.25	210.547	5866.6	469.467	2460.7	420.615	1784.08	381.136	4269.23	477.619	1226.86	408.879	2191.85	486.939	2682.58	225.916	3118.43	585.755	2750.75	170.735	3582.91	295.677
-0.714286		2685.14	133.168	3468.05	374.3	4216.91	359.43	5215.46	389.353	3285.48	161.88	2489.3	258.7	3667.79	664.973	1695.09	239.405	3791.03	511.651	3522.63	367.035	6342.73	371.149	2768.99	549.368	2078.24	426.077	4822.53	550.302	1395.75	500.193	2657	539.034	2942.09	355.653	3223.96	649.99	3280.45	235.92	4292.35	221.823
-0.649351		3523.72	174.144	3920.06	456.518	4584.35	454.216	5696.84	450.176	3573.6	223.325	2803.71	317.743	4208.34	795.736	1921.15	318.489	4103.43	628.353	3796.58	269.229	6778.53	433.532	3014.64	610.256	2473.22	573.672	5283.54	714.552	1457.95	575.512	2914.76	514.588	3266.25	411.185	3424.11	686.455	3626.12	383.496	5386.24	371.176
-0.584416		3986.92	252.058	4293.42	479.326	5068.32	678.704	6177.54	406.246	4076.79	258.529	3071.46	391.888	4975.68	1170.74	2214.46	488.775	4320.64	594.763	4466.85	448.407	7346.43	402.831	3237.43	729.526	2848.02	763.951	5786.21	1008.27	1568.99	837.727	3572.14	533.152	3652.13	402.477	3637.44	726.145	4015.18	597.684	6317.53	268.118
-0.519481		4764.86	302.013	4719.48	552.652	5741.49	1155.38	6514.78	514.992	4586.44	263.285	3285.43	499.107	5687.08	1643.05	2504.56	510.69	4664.7	659.617	4899.71	549.273	8072.74	449.131	3422.52	1012.82	3190.89	958.035	6173.49	1196.49	1705.52	1160.74	3739.3	700.79	3973.12	571.989	3909.99	812.255	4380.72	740.761	7397.35	644.706
-0.454545		5431.01	419.484	5041.02	731.064	6334.18	2069.25	6912.07	555.488	4996.01	329.337	3467.75	546.41	5819.58	2265.37	2789.34	551.97	4899.5	731.892	5393.54	609.334	8780.23	466.358	3735.07	1281.45	3598.89	1188.99	6645.23	1323.29	1821.42	1396.12	4448.6	993.481	4293.63	660.459	4085.24	846.845	4753.24	1059.97	8440.94	905.706
-0.38961		6011.25	575.063	5526.65	863.884	6736.64	3496.42	7342.79	635.787	5476.48	363.795	3963.67	594.082	6050.18	3250.84	3121.7	623.199	5004	866.682	5596.43	515.786	9494.27	503.195	3904.28	1427.3	4089.34	1537.09	7444.92	1454.14	1876.68	2020.07	4569.63	1558.55	4711.29	1175.41	4093.94	1145.14	4888.2	1589.27	9172.8	1086.65
-0.324675		6486.38	983.875	5832	1074.35	7258.17	5249	7668.6	702.68	5993.77	522.505	4028.67	822.671	6328.29	4781.18	3381.72	723.246	5376.31	897.555	5761.12	552.332	10228.5	590.468	4275.65	1659.15	4384.57	2092.04	8211.41	1714.96	1987.56	2796.24	5115.85	2227.22	5038.5	1541.68	4285.88	1481.76	5135.44	2101.96	9673	1850.53
-0.25974		6701.05	1467.94	6392.75	1711.8	7445.82	6679.89	8141.49	734.72	6440.97	728.287	4392.06	1332.11	6803.03	6641.84	3679.68	848.573	5492.37	1444.33	6128.2	751.374	10633.1	563.089	4655.27	2327.52	4841.63	2935.16	8927.31	2504.07	2062.33	3904.43	5530.61	3290.25	5408.41	2462.89	4454.22	2219.99	5591.4	2735.8	10388.5	2900.62
-0.194805		6750.82	2374.31	6783.11	3166.01	7904.3	8156.63	8254.45	826.273	6797.54	1031.72	4729.45	2420.58	7588.18	8706.58	4149.93	971.144	6024.84	2329	6225.21	1180.52	11218.3	813.786	4794.3	3520.51	5072.56	3729.12	9555.03	4251.39	2110.9	5242.49	5796.96	4941.03	5914.32	3658.68	4648.04	3606.6	5825.18	3266.21	10825.1	4116
-0.12987		7102.4	3573.01	7093.32	5308.86	8395.15	9604.68	8380.76	946.119	7083.74	1467.66	5150.07	4028.26	7885.5	10806.2	4442.16	1280.88	6514.09	3581.09	6559.58	2128.12	11544.4	1259.35	4949.27	4761.9	5260.96	4566.01	10217.3	6695.52	2229.28	6666.6	6177.55	6418.19	6364.1	5486.31	4735.83	5637.1	6387.56	4080.36	11275.5	5793.38
-0.0649351		7125.71	4572.97	7618.62	7833.01	8936.7	10433.7	8518.61	982.888	7366.68	1929.8	5493.43	5893.97	8751.92	12602.4	4479.41	1469.41	6769.27	4765.44	6848.62	2835.37	11813.8	1694.32	5387.94	5392.13	5463.8	5218.07	10690.1	8769.43	2304.62	7770.73	6432.97	7781.73	6618.91	7530.32	4738.4	7588.18	6955.44	4703.08	11354.6	6992.76
0		7213.09	5207.19	7681.81	8967.84	9163.85	10586.3	8606.93	1012.45	7792.25	2186.64	5610.26	7037.54	9232.45	13792.4	4551.03	1618.54	6971.45	5098.43	6969.6	3029.91	11819.7	1965.05	5669.18	5716.44	5475.91	5766.64	11114.8	9775.62	2332.75	8768.78	6546.9	8172.91	6625.59	8301.88	4774.19	8104.62	7214.97	5053.24	11414.8	7184.68
0.0649351		7184.5	5075.54	7663.54	8212.79	9156.73	10080.4	8274.55	875.043	7927.59	2029.88	5534.22	6611.65	9215.4	12866.1	4220.32	1409.18	6682.2	4555.21	6959.82	2816	11484.2	1674.55	5539.56	4760.26	5314.47	5669.73	11093.2	9285.13	2296.13	8627.04	6407.33	7462.88	6511.96	7990.62	4580.7	7276.17	7203.28	4971.53	10895.1	6054.65
0.12987		7057.51	4560.93	7630.36	6522.05	8847.4	8602.38	7746.6	581.751	7818.2	1754.42	5450.14	5045.93	8899.08	10724.9	3994.47	1204.94	6505.48	3376.82	6716.01	2450.44	11334.6	1220.16	5416.2	3436.21	5131.64	5356.51	10946.9	7780.89	2167.92	8027.15	6159.69	5996.86	6241.45	6994.39	4507.99	5651.29	7171.32	4514.38	10582.9	4436.94
0.194805		7121.88	3739.25	7311.92	5162.45	8591.45	6399.04	7035.54	400.896	7516.13	1404.52	5438.99	3255.53	8946.58	8338.34	3737	1124.35	6059.14	2376.39	6611.22	1846.37	10854.2	730.389	5293.32	1938.37	4687.64	4496.53	10677.5	6046.84	2096.52	7031.96	5672.14	4369.5	6254.58	5360.94	4562.56	3449.65	6966.48	4015.38	9638.06	3031.77
0.25974		7044.37	3260.53	6664.7	4015.93	8526.2	4363.07	6297.73	350.682	7052.11	1314.33	5177.81	2158.58	8010.24	5964.53	3567.07	808.556	5620.6	1517.44	6405.78	1574.94	10338.1	536.638	5035.66	965.268	4344.75	3551.96	10529.2	4333.48	2119.91	5730.37	5464.41	3005.81	6013.2	3626.53	4345.4	2062.72	6878.05	3111.27	9361.56	2282
0.324675		6879.62	2367.5	6307.57	2986.71	8036.43	2841.06	5482.04	276.549	6484.6	1088.41	4811.8	1182.31	7526.32	4276.45	3383.43	810.112	5160.09	1024.74	6186.22	1161.39	9787.84	389.613	4617.54	563.072	4047.52	2772.77	10214	3076.31	2073	4575.8	5221.94	1987.35	5831.16	2532.76	4289.44	1359.18	6555.3	2262.2	8826.12	1831.29
0.38961		6727.35	1651.29	6042.35	2133.64	7511.39	1999.88	4885.48	228.716	5893.48	1060.73	4429.58	812.03	6706.45	3364.16	3105.15	730.794	4799.85	819.886	5997.92	709.73	9088.11	268.926	4415.76	318.576	3883.45	2128.84	9773.91	2153.8	1897.36	3999.59	5011.5	1441.3	5418.53	1806.94	4314.24	1093.49	6164.66	1557.27	8129.24	1568.29
0.454545		6323.13	1134.82	5894.93	1522.49	7013.31	1648.46	4264.58	162.122	5364.64	788.98	4053.59	644.322	5773.63	2577.29	2960.89	583.378	4334.99	716.269	5802.98	298.292	8268.87	367.384	4124.91	473.716	3693.2	1482.59	9208.62	1693.59	1748.43	3529.91	5014.06	1154.45	5094.85	1307.36	3943.64	955.81	5800.66	1123.29	7119.18	1063.82
0.519481		5660.21	845.237	5697.91	1098.23	6472.61	1367.19	3896	144.89	4909.7	502.828	3834.78	504.011	5153.18	1938.31	2830.96	534.399	3944.47	557.64	5389.18	200.153	7613.97	198.309	3794.51	287.908	3345.16	1142.32	8934.85	1270.06	1745.04	3048.91	4743.97	935.04	4910.32	862.437	3653.73	865.675	5364.18	969.9	6113.09	559.029
0.584416		4967.45	674.723	5318.24	895.191	5973.56	1173.5	3484.54	151.871	4594.6	394.138	3441.38	396.305	4438.84	1499.95	2575.85	500.966	3634	486.337	4971.99	182.469	6470.42	270.919	3595.3	277.926	3021.55	709.996	8271.6	1085.84	1523.89	2495.78	4338.23	808.865	4654.89	751.625	3480.4	661.69	4723.67	883.553	5601.41	638.647
0.649351		4411.94	535.118	4789.27	837.548	5354.42	939.05	3123.75	103.797	4277.65	321.418	3200.83	289.73	4441.61	1341.89	2502.22	444.372	3200.61	339.493	4616.9	129.566	5680.1	279.365	3390	212.337	2882.16	481.48	7798.62	1075.11	1407	2055.78	3912.05	741.72	4468.89	732.365	3146.99	671.095	4027.78	773.578	4936.38	382.618
0.714286		3947.49	236.354	4315.37	652.306	4640.32	854.183	2601.72	115.758	3959.74	277.358	2868.95	258.949	3919.66	1029.47	2187.17	422.645	2869.14	331.275	4267.68	150.842	4956.14	106.663	3129.5	314.731	2760.25	444.057	7406.39	1044.92	1284.62	1603.2	3582.62	756.373	4288.31	561.486	2843.44	386.62	3431.87	601.868	4521.12	429.353
0.779221		3550.65	266.204	3971.65	527.567	4057.18	665.851	2125.99	107.964	3688.37	224.243	2633.12	269.08	3742.55	777.157	1834.6	335.149	2664.79	239.829	4054.36	46.879	4634.13	52.032	2974.36	168.108	2563.52	340.574	6846.77	849.227	1124.45	1249.99	3284.07	651.367	4078.51	528	2371.69	404.895	2900.1	486.293	3867.44	544.324
0.844156		3272.64	199.911	3605.7	445.086	3961.31	632.978	1824.81	76.403	3411.62	152.48	2406.7	256.06	3526.37	702.079	1630.38	329.212	2302.13	228.162	3445.7	161.43	4600.21	108.956	2594.49	325.199	2315.49	193.877	6518.13	714.413	966.152	1187.07	2992.4	542.637	3800.38	432.331	2118.26	345.225	2555.82	474.445	3700.76	298.823
0.909091		2838.45	208.093	3344.73	396.506	3518.64	474.003	1539.59	67.414	3045.85	182.367	1997.01	289.213	3069.29	765.947	1462.82	219.02	2094.14	275.312	3039.09	257.289	4145.8	133.856	2341.48	296.936	2218.24	222.816	6285.99	615.113	795.416	1083.88	2635.18	444.311	3477	302.274	1933.74	385.215	2344.55	398.84	3079.68	241
0.974026		2337.5	182.157	3180.01	335.277	3379.35	349.648	1272.17	83.034	2796.9	187.328	1589.03	243.73	2770.16	607.052	1233.18	199.301	1767.98	164.472	2426.3	162.332	3812.12	184.945	2142.51	236.022	1897.96	92.314	5881.5	557.213	700.14	869.015	2368.63	355.654	3219.4	553.395	1796.4	307.59	1885.26	179.671	2821.59	244.588
1.03896		2016.14	158.668	2774.45	267.945	3313.84	265.707	1022.8	158.438	2480.12	180.49	1351.77	190.739	2327.92	603.526	974.017	185.97	1439.91	108.118	2012.52	107.131	3320.02	129.927	2047.19	210.507	1904.07	0	5227.64	439.139	636.855	695.682	1902.64	197.977	2920.2	381.068	1467.26	263.195	1650.49	261.528	2521.24	160.441
1.1039		1624.11	183.308	2154.81	253.401	3044.83	237.989	754.77	107.48	2044.31	125.492	1062.8	154.227	1982.84	563.684	883.75	162.342	1165.27	77.403	1753.15	125.109	2842.37	49.85	1760.82	122.243	1408.46	69.583	4665.9	394.875	501.93	612.743	1601.22	227.429	2760.73	316.222	1165.04	199.195	1492.7	124.64	2007.06	241.059
1.16883		1340.39	115.154	1681.38	216.309	2740.96	194.183	648.812	19.524	1524.77	146.901	833.154	115.882	1589.87	655.579	672.375	175.255	914.36	116.596	1459.65	59.489	2519.74	109.498	1548.22	361.539	1260.83	20.988	4124.86	304.568	453.328	754.251	1392.85	170.384	2471.71	238.925	840.1	58.415	1327.03	170.701	1524.62	185
1.23377		1043.61	52.213	1342.89	163.959	2306.87	124.859	326.42	0	1105.67	107.036	702.462	175.245	1230.11	517.789	511.898	92.645	776.486	98.522	1156.83	162.535	2099.02	76.593	1269.22	224.45	1051.19	37.054	3798.52	327.487	298.463	597.199	1247.82	29.865	2286.77	330.891	626.12	95.765	911.661	193.067	1360.41	118.706
1.2987		878.919	78.203	1096.46	167.232	1991.82	118.787	242.092	37.056	757.033	94.22	453.42	27.314	826.237	541.052	330.133	115.269	579.669	79.249	947.067	61.004	1620.58	77.664	1080.7	183.723	769.905	106.764	3499.06	272.691	198.194	536.546	802.188	144.263	2026.58	241.675	477.215	142.455	663.98	237.284	978.765	94.912
1.36364		537.45	85.54	780.994	188.343	1796.52	122.859	160.113	27.001	353.506	73.112	255.655	106.881	648.711	543.236	224.265	129.44	369.059	33.651	817.147	118.768	1067.81	10.403	860.153	182.009	569.565	64.874	3377.64	225.929	140.114	517.219	622.574	164.806	1681.65	296.193	285.18	188.37	476.648	141.346	784.941	116.765
1.42857		440.126	43.8	573.259	122.743	1511.38	112.031	59.915	11.586	209.227	92.505	329.76	50.454	301.711	425.736	170.077	114.942	140.456	28.028	618.469	167.489	448.189	18.297	622.379	109.959	273.237	12.207	3026.14	304.676	169.927	549.524	214.9	86.121	1454.51	164.867	60.165	183.015	303.618	83.998	367.118	47.735
1.49351		334.622	0	409.496	68.302	1087.22	77.848	0	30.71	0	79.398	113.9	47.538	0	267.578	0	77.697	0	0	513.558	162.964	0	0	444.374	140.851	0	8.544	2898.3	259.954	113.251	524.953	0	12.294	1544.03	217.277	0	0	0	93.722	274.118	29.529

## Sheet: 35 nM holo(H-dN)
Figure 1-source data 2
Figure 1D
Non-normalized values
	35 nM holo(H-dN)_150 min
Chromosome sample		1		2		3		4		5		6		7		8		9		10		11		12		13		14		15		16		17		18		19		20
		DAPI	mSMC4	DAPI	mSMC4	DAPI	mSMC4	DAPI	mSMC4	DAPI	mSMC4	DAPI	mSMC4	DAPI	mSMC4	DAPI	mSMC4	DAPI	mSMC4	DAPI	mSMC4	DAPI	mSMC4	DAPI	mSMC4	DAPI	mSMC4	DAPI	mSMC4	DAPI	mSMC4	DAPI	mSMC4	DAPI	mSMC4	DAPI	mSMC4	DAPI	mSMC4	DAPI	mSMC4
Distance (µm)
-1.49351		78.791	50.746	223.578	476.468	0	0	0	19.4	585.975	420.424	276.704	452.274	117.283	171.432	0	62.307	170.159	193.351	135.271	201.617	26.466	141.803	0	0	0		340.905	322.238	214.483	207.406	267.106	235.817	0	94.332	327.951	411.021	25.186	294.003	0	197.318
-1.42857		87.675	120.636	208.161	487.74	48.74	24.814	39.16	37.24	524.495	426.533	270.028	497.412	131.172	201.273	41.385	0	136.223	322.808	173.773	194.065	0	137.095	10.185	34.365	50.725	0	227.667	436	217.208	216.644	296.835	258.44	17.362	172.8	359.897	461.211	55.239	319.429	81.346	216.13
-1.36364		52.035	73.964	211.822	509.806	23.235	105.611	79.68	0	559.091	428.922	270.147	465.431	168.403	218.383	33.539	2.23	170.901	263.936	173.165	182.369	68.977	83.606	78.514	45.077	37.011	47.777	366.857	328.524	251.633	200.139	337.152	273.356	56.841	225.661	415.447	450.537	139.776	250.432	89.316	236.125
-1.2987		132.163	100.455	211.041	600.877	2.776	96.093	37.96	14.44	570.656	459.087	265.898	474.389	226.684	253.621	50.616	47.077	222.052	279.834	208.23	192.95	52.547	171.645	70.304	61.065	105.241	67.62	341.429	340.666	324.05	268.579	361.482	258.852	160.23	300.028	470.046	454.104	126.919	243.07	135.209	238.565
-1.23377		238.496	113.714	254.295	665.515	69.377	65.322	8.12	73.6	639.841	519.673	313.83	481.612	249.847	335.3	42.077	76.615	295.078	311.433	157.214	155.125	88.637	207.591	112.449	55.114	170.507	149.953	351.476	539	341.47	355.965	388.378	369.006	258.414	322.513	568.067	541.781	143.477	359.513	186.779	247.117
-1.16883		204.863	212.571	284.948	646.813	123.231	146.46	73.56	20.4	747.329	621.254	350.268	517.036	281.657	326.682	59.616	54.23	275.306	360.499	288.336	263.26	135.676	161.147	174.769	86.459	270.597	255.986	478.714	453.428	403.853	356.656	407.001	380.98	414.125	359.828	662.062	569.847	137.926	426.576	157.243	292.789
-1.1039		285.041	242.668	270.197	655.617	132.338	241.559	145.6	110	746.259	675.074	390.329	605.756	240.139	439.674	28.616	93	368.957	347.345	321.319	249.564	122.22	224.568	216.991	108.959	380.304	317.274	557.667	408.714	424.669	377.556	470.731	402.99	566.264	417.103	840.835	567.699	304.543	535.921	221.6	357.641
-1.03896		358.755	431.35	377.151	807.252	143.225	289.146	201.16	74.52	863.382	679.18	483.631	636.221	283.901	493.317	44.154	87	360.771	417.085	252.59	328.429	151.81	260.244	206.471	180.077	543.174	329.247	617.81	589.857	491.149	376.415	521.198	392.329	892.65	542.496	877.133	665.046	345.152	596.612	297.05	428.343
-0.974026		525.908	592.649	346.265	956.864	114.058	314.726	304.64	121.28	1018.54	778.273	510.55	591.734	327.687	541.045	181.308	84.615	385.696	389.996	312.375	392.165	272.187	367.273	330.4	277.322	627.572	431.808	887.429	625.19	648.704	481.189	536.995	441.009	1209.27	611.316	998.926	709.112	503.556	526.958	351.11	496.342
-0.909091		605.452	789.238	390.817	1093.85	239.583	366.587	275.12	129.04	1200.87	860.97	620.595	715.218	421.703	618.473	265.077	150.153	512.148	470.654	376.151	389.131	376.081	466.444	365.406	325.065	767.114	609.353	1024.48	674.809	709.966	620.854	727.887	427.903	1411.43	802.969	1076.17	710.707	716.832	512.532	462.026	609.031
-0.844156		743.284	979.032	434.727	1327.47	318.515	494.803	444.28	186.4	1418.17	1113.78	709.559	695.974	545.492	691.429	363	158.615	616.128	511.59	440.685	333.696	495.222	615.911	526.983	405.106	967.067	760.55	1271.24	622.428	852.247	674.546	865.851	479.415	1656.3	905.677	1313.74	780.761	940.94	566.293	565.262	634.245
-0.779221		911.757	1276.65	493.557	1579.37	445.637	552.306	677.24	332.04	1720.04	1217.97	943.769	774.227	681.143	727.694	613.616	298.077	691.677	443.623	530.92	415.806	607.504	715.014	729.655	452.671	1143.99	792.27	1397.14	715.952	961.194	714.517	910.015	521.675	2170.33	1193.75	1678.46	958.021	1225.05	596.326	759.47	749.791
-0.714286		1215.52	1529.41	603.824	1747.31	657.62	850.623	1031.64	506.36	2105.55	1330.03	1229.16	849.091	944.69	886.171	974	384.923	1021.19	608.2	637.261	526.249	848.809	851.367	923.269	527.016	1634.91	824.154	1817.91	779.952	1145.59	883.919	1082.26	598.696	2782.9	1526.28	1841.47	1007.01	1597.7	643.233	1025.27	907.206
-0.649351		1494.99	1946.56	776.981	2012.04	804.981	1059.85	1389	651.92	2726.39	1580.35	1664.2	942.434	1221.89	1137.59	1407.15	433.923	1361.63	637.138	758.904	593.381	1278.44	1000.49	1238.01	594.359	2120.13	849.744	1972.62	795.714	1437.8	1019.49	1377.07	680.831	3188.41	1771.89	2207.57	1197.31	2049.28	706.863	1428.77	1162.38
-0.584416		2027.9	2339.54	832.287	2161.33	1186.69	1405.88	2003.12	715.32	3288.57	2026.38	2016.4	1211.47	1562.27	1550.88	1804.54	469.846	1586.98	768.111	911.818	691.857	1606.32	1162.98	1614.57	639.392	2508.53	1064.4	2460.86	925.904	1804.17	1197.95	1759.56	851.691	3525.5	2422.08	2611.49	1250.3	2530.25	851.128	1817.45	1478.3
-0.519481		2503.89	2706.56	1109.89	2316.69	1597.96	2065.15	2511.48	944.4	3871.16	2665.53	2552.38	1470.97	1944.07	2532.29	2254.92	680.461	1939.47	1039	1220.55	1057.07	1979.6	1476.28	2194.73	638.047	3026.97	1469.38	2785.67	1165	2263.09	1574.43	2209.9	908.388	4041.79	2878.67	2987.55	1460.45	3075.2	935.44	2198.24	2124.93
-0.454545		2948.81	3586.66	1469.84	2794.22	2065.87	3097.17	3217.64	1459.96	4662.02	3705.05	3291.32	1866.86	2460.26	3548.79	2713.77	1083	2476.89	1403.12	1578.17	1427.58	2305.09	2174.32	2758.16	993.951	3598.63	2286.68	3197.86	1809.29	2807.73	2028.52	2769.58	1109.39	4634.44	3710.5	3482.6	2283.14	3722.41	1368.46	2779.12	3367.07
-0.38961		3764.06	4921.39	1987.82	3363.44	2509.91	4327.25	4061.68	2494.88	5581.58	5576.85	4186.57	2547.12	3111.61	4345.96	3342.46	1735	2982.59	2099.9	2001.37	1989.74	2897.7	2979.08	3505.94	1460.05	4114.55	3639.56	3630.43	2683.48	3342.71	2758.53	3351.58	1401.54	5369.9	4705.57	4108.59	3443.62	4497.62	1837.25	3487.32	5206.16
-0.324675		4565.66	7464.59	2667.85	4709.25	3104.42	5881.05	5083.8	4524.88	6548.14	7845.96	5300.62	3592.24	3642.98	5636.94	4114.54	2695	3713.89	2757.87	2383.5	2903.42	3351.03	4494.64	4180.23	1976.52	4863.02	5472.99	4461.48	3775	4066.17	4204.65	3932.68	1939	6135.18	5874.96	4758.96	4659.85	5281.7	2656.66	4376.62	7241.4
-0.25974		5442.94	11362	3730.43	6753.24	3631.9	6932.6	6186.12	8092.96	7028.14	10664.1	6409.68	5744.5	4508.27	8014.08	4847.39	4636.69	4543.83	3772.94	2891.89	4281.01	3911.49	6815.29	5106.77	3023.17	5898.98	7682.05	5192.62	5626.71	4814.5	7043.03	4694.48	2619.23	6651.14	7497.37	5701.29	6778.95	6068.56	4236.54	5287.03	9432.89
-0.194805		6113.96	16446.3	4718.89	9733.27	4233.28	8435.48	6880.12	14106.4	7824.04	13771	7668.33	9886.14	5051.12	12098.4	5895.15	6990.69	5444.49	6056.72	3348.77	6220.31	4407.22	9765.16	6051.84	4941.16	7247.2	10357.8	6033.86	8267.71	5505.51	11394.2	5565.92	3672.1	7860.35	9858.13	6842.31	10134.4	7024.95	6940.54	6169.16	12390.4
-0.12987		6606.11	22669.1	5295.47	13325.1	4800.08	10430.2	7405.52	20586	8590.77	16945.2	8713.25	15850.1	5716.19	16073.6	6811.31	10091.6	6237.28	10003.2	3799.2	8705.34	5065.05	12975.8	6980.29	7993.27	8567.33	14192.5	6828.9	11644.2	6204.63	16234.2	6243.45	5310.37	8538.96	11983.7	8158.24	15186.5	8303.85	10818.1	7283.03	16139.8
-0.0649351		6911.37	27125	5669.37	16676.1	5264.99	12663.5	7455.48	25691	8647.14	20027.1	9594.87	21011.3	6161.37	19174.6	7844.08	12749.5	7015.14	14495.1	4165.26	11124.9	5389.37	15094.9	7770.28	11103.4	9769.27	18460.2	7006.57	15305.6	6600.63	19956.5	6811.76	6867.32	9227.22	13516.9	9026.62	20559	9491.73	14502	7897.08	19329
0		7201.41	28830.5	5743.44	17951.3	5448.62	14150.8	7192.52	26243.7	8447.87	22449.2	10037.6	22598.8	6413.94	20856.9	8737.46	13458.4	7319.74	17205.6	4405.49	12461.8	5614.26	15853.7	8224.57	13289.8	10555.4	22403	7116.57	17374.2	6991.24	20892.3	6993.73	8248.99	9658.64	14128.7	9245.26	22893.7	10199.7	16733.4	8010.87	20407.2
0.0649351		6649.89	25908.4	5278.86	17918	5342.3	14077.6	6526.12	22500.9	8209.22	21082.6	9960.33	19628.4	5964.1	20674	8600.15	12424.3	7041.65	16084.9	4284.4	11775.8	5343.54	14170.2	8191.68	12953.9	10229.6	22479	6510.52	17221.8	6717.66	18354	6369.9	7532.62	9484.08	12394.8	8731.22	21608.6	9945.9	16700.8	7824.43	18559.2
0.12987		5704.57	19388.9	4621.52	15169	5205.31	11665.3	5699.52	16322.4	7801.98	17918.4	9200.01	13654.3	5104.45	18218.3	8448.46	11085.4	6561.48	13179.3	3824.93	9647.2	4877.96	11269.3	7876.19	11147.7	9212.84	19486.3	5410.14	14376.9	6112.61	14821.8	5321.96	5825.76	8307.34	9838.7	7663.93	17277.9	8964.57	14938	7240.86	14017.9
0.194805		4757.35	12558.4	3886.44	11455.2	4832.77	8472.04	5013.08	10028.8	7031.98	12475	8120.92	8086.27	4138.84	14027	7846.23	8937.31	5934.77	9384.35	3263.63	6762.24	4261.35	7785.86	7191.87	8697.8	8086.61	14288.7	4560.14	10149.8	5450.82	10897	4365.61	3612.5	7213.76	6874.26	6675.34	11777.5	7499.84	11423.1	6409	8708.38
0.25974		3913.61	7509.62	2999.2	8133.7	4414.32	5603.32	4222.92	6199.08	6133.29	7687.7	6887.58	4828.44	3396.11	8594.74	7207.77	6545.69	5369.35	6768.19	2676.28	4178.94	3606.28	4728.33	6367.98	6675.16	6730.68	9576.83	3484.95	6900.38	4360.4	7494.16	3527.65	1922.99	5979.64	3986.59	5748.19	7232.43	6094.06	7424.07	5517.07	4798.53
0.324675		2973.49	4309.19	2233.13	5893.6	3696.62	3522.35	3272.56	4129.72	5227.26	4120.89	5503	3388.29	2662.38	4173.08	6130.62	4741.08	4764.27	5198.32	2140.72	2715.29	2970.79	2878.86	5439.42	5225.27	5451.01	6384.25	2977.57	4850.28	3271.99	4667.06	2637.87	1052.13	4803.22	1983.03	4978.85	4209.42	4952.64	4267.88	4481.82	2866.24
0.38961		2345.88	2353.84	1844.73	4241.74	3160.97	2472.62	2640.12	2792.72	4355.82	2145.76	4503.25	2398.7	1974.32	2086.83	5455.39	3305.92	3871.49	4307.9	1800.14	1766.3	2429.26	1761.72	4539.05	3981.82	4564.68	4388.36	2343	3679.67	2424.82	2775.19	2074.24	695.727	3610.48	1112.59	4285.66	2618.28	4131.57	2364.02	3767.81	1747.3
0.454545		1885.69	1282.44	1391.63	3457.41	2629.7	1998.96	2232.24	1719.4	3462.08	1323.5	3620.59	1705.62	1487.9	1240.48	4372.08	2298.08	2913.9	3408.96	1516.24	1295.58	1870	1119.16	3722.09	2784.8	3778.34	3213.84	1764.14	2999.33	1846	1683.82	1562.24	508.076	2842.53	771.132	3525.84	1647.99	3359.23	1418.15	3149.07	1183.34
0.519481		1425.34	933.458	1145.82	2993.88	2198.37	1547.21	1715.32	1378.84	2802.87	969.889	2793.62	1178.07	1082.98	900.886	3822.31	1803.92	2353.1	2663.97	1152.13	874.945	1479.06	753.522	3174.98	1633.81	3171.1	2218.95	1289.33	1946.86	1399.94	1185.62	1137.27	362.391	2086.64	661.278	2862.59	1155.07	2774.94	949.793	2529.61	916.675
0.584416		1197.7	796.666	800.309	2617.65	1875.01	1157.17	1188.8	1010.4	2196.68	643.759	2265.42	946.929	839.208	601.419	3144.31	1365.54	1861.39	1872.17	814.04	584.315	1041.78	573.256	2697.57	1011.28	2553.96	1326.88	942.143	1412.05	1095.14	948.265	765.854	267.143	1552.33	546.401	2333.74	807.186	2297.59	690.571	2140.47	618.871
0.649351		834.211	692.427	578.115	2228.25	1632.51	921.477	916.76	772.92	1829.93	431.821	1833.6	819.492	597.554	457.74	2705.46	1107.54	1319.02	1267.48	606.374	466.214	769.108	428.37	2067.97	787.969	2109.58	1015.08	709.857	1093.19	843.209	642.658	484.202	352.495	1169.54	423.945	1934.76	674.021	1895.73	547.765	1843.05	551.818
0.714286		585.944	503.075	456.096	1747.67	1247.58	762.68	622.12	525.44	1450.76	375.873	1386.93	742.636	449.029	358.191	2070.31	1095.62	973.387	788.163	451.785	364.893	582.817	376.865	1464.87	546.759	1685	757.872	549.381	887.714	582.976	536.768	313.324	217.361	863.324	321.241	1425.14	478.302	1545.24	475.592	1472.57	537.796
0.779221		454.332	519.823	384.074	1433.56	1100.74	627.496	528.32	356.4	1107.57	383.237	1084.7	563.07	445.036	325.915	1740.08	968	700.182	563.307	296.753	266.321	423.465	292.776	1086.46	515.443	1263.18	471.229	476.429	670	399.066	414.321	214.029	161.322	710.745	275.364	1053.41	452.517	1240.14	373.46	1094.45	447.417
0.844156		394.95	409.066	374.118	1134.56	781.126	455.415	440.64	370.6	836.939	254.744	971.735	382.401	293.213	296.207	1695.62	765.538	463.367	392.096	166.876	281.754	419.612	223.867	871.471	457.106	975.248	439.526	338.238	505.381	218.103	350.638	119.61	142.532	570.812	190.317	806.686	377.971	898.901	398.838	753.603	329.008
0.909091		349.877	279.935	354.419	884.319	550.294	373.766	376.84	352.44	546.434	235.529	769.3	375.754	164.644	224.914	1134.77	684.846	316.115	285.302	166.666	155.465	298.793	165.417	704.324	358.526	792.266	365.179	293.953	423	123.581	337.016	63.503	157.928	468.508	189.892	568.963	348.633	630.864	244.724	505.49	332.602
0.974026		305.504	253.148	326.655	743.792	459.721	318.174	373.28	286.36	358.718	169.591	515.078	220.771	143.095	234.377	1043.77	649.461	125.284	279.47	87.389	155.447	209.798	109.336	547.749	285.29	634.748	271.218	252.714	283.857	122.706	260.124	61.943	52.178	379.582	148.5	439.934	298.847	439.393	240.787	410.888	296.972
1.03896		204.238	253.21	215.566	599.367	380.195	270.603	225.12	252.16	201.418	101.784	301.749	226.553	114.627	198.899	845.154	574.538	174.484	219.54	69.376	189.524	203.299	116.658	538.381	222.522	478.835	258.789	245.81	271.428	102.744	229.498	69.316	128.634	268.378	55.246	341.058	199.517	311.869	185.62	392.881	246.55
1.1039		221.284	137.3	124.536	496.484	320.446	237.008	295.88	222.4	159.04	94.333	313.269	159.495	109.843	212.189	764.77	544	69.628	186.881	75.639	200.814	146.465	124.338	453.369	280.583	333.156	212.234	192.381	266.285	60.568	176.47	38.731	109.24	166.078	72.003	252.703	164.645	233.546	217.4	280.134	242.38
1.16883		189.881	157.499	10.136	412.072	290.065	207.878	298.16	211.32	135.605	119.162	193.518	233.864	71.657	170.308	646.616	374.923	96.901	87.618	68.497	152.426	146.897	115.645	393.389	251.359	217.197	207.1	219.857	28.381	59.402	93.525	54.506	79.485	151.767	109.224	172.029	125.566	117.819	157.031	250.518	234.627
1.23377		143.333	131.586	17.935	255.523	214.974	119.174	247.4	203.2	105.38	0	105.325	199.709	61.727	117.686	495.077	370.615	51.986	76.239	34.791	178.059	143.772	105.097	305.532	216.077	206.777	191.937	92.381	84.381	22.119	186.808	41.029	85.506	131.4	124.62	142.959	79.86	117.31	114.752	176.058	57.144
1.2987		77.783	79.024	26.027	231.824	203.192	180.422	243.4	177.88	70.689	34.487	85.32	39.283	32.366	117.893	513.616	317.23	17.523	27.358	30.888	54.945	142.526	50.532	229.459	134.784	78.449	265.929	83.333	80.714	28.316	144.064	17.728	0	118.34	0	93.236	92.938	54.532	219.254	168.889	63
1.36364		31.793	93.725	30.184	184.767	179.6	106.202	213.12	188.24	27.941	64.626	77.567	0	0	0	521.462	357.077	29.251	58.78	34.464	65.996	87.516	0	260.051	131.608	117.336	258.221	27	11.476	47.073	113.048	2.612	56.532	117.894	85.822	26.786	61.021	26.388	0	135.545	49.431
1.42857		51.783	24.116	11.937	47.979	156.34	125.046	223.04	152.4	20.545	75.734	50.611	32.647	25.199	60.361	397.077	311.307	20.672	0	45.711	22.785	127.289	95.085	236.985	52.765	111.567	200.876	0	38.666	24.051	0	1.914	74.18	93.015	130.451	7.595	14.79	0	137.156	107.036	0
1.49351		0	0	0	0	140.806	39.81	239.96	161.92	0	10.75	0	15.652	16.624	82.448	379.693	375.307	0	31.211	0	0	4.888	19.844	185.114	60.698	157.977	270.478	64.143	0	0	26.251	0	18.492	87.065	184.954	0	0	2.014	130.224	102.632	45.49
																											248.52

## Sheet: 17.5 nM holo(H-dN)
Figure 1-source data 2
Figure 1D
Non-normalized values
	17.5 nM holo(H-dN)_150 min
Chromosome sample		1		2		3		4		5		6		7		8		9		10		11		12		13		14		15		16		17		18		19		20
		DAPI	mSMC4	DAPI	mSMC4	DAPI	mSMC4	DAPI	mSMC4	DAPI	mSMC4	DAPI	mSMC4	DAPI	mSMC4	DAPI	mSMC4	DAPI	mSMC4	DAPI	mSMC4	DAPI	mSMC4	DAPI	mSMC4	DAPI	mSMC4	DAPI	mSMC4	DAPI	mSMC4	DAPI	mSMC4	DAPI	mSMC4	DAPI	mSMC4	DAPI	mSMC4	DAPI	mSMC4
Distance (µm)
-1.49351		77.121	69.368	412.157	192.909	0	0	0	0	0	0	27.393	109.115	0	86.083	244.686	10.397	10.378	38.899	0	15.5	0	0	739.192	573.192	206.981	57.342	0	0	0	0	0	0	0	111.319	0	0	0	24.489	241.498	606.987
-1.42857		188.304	62.477	537.613	177.413	49.982	33.018	76.838	32.873	110.846	13.039	39.697	115.902	119.566	53.552	341.604	0	38.686	13.899	23	13	63.827	2.861	831.273	641.697	187.298	24.707	24.558	23.637	138.313	18.74	13.476	15.398	59.002	71.9	36.419	45.179	46.073	11.967	292.12	589.056
-1.36364		300.458	161.299	554	271.858	222.424	123.882	118.782	59.533	225.615	87.077	0	169.558	148.274	62.417	538.685	27.534	73.881	35.39	30	94	120.91	25.243	908.465	677.061	221.529	0	83.664	74.751	242.631	29.861	54.463	10.545	198.869	61.778	92.73	44.498	109.367	0	335.049	439.338
-1.2987		422.29	47.491	788.111	206.847	289.811	73.073	180.638	148.98	225.538	55.539	28.59	181.607	290.024	10.917	739.923	27.819	85.988	31.106	60.5	58.5	189.517	21.345	1121.77	706.192	292.217	96.247	141.051	82.941	311.19	125.27	56.326	57.06	274.353	52.487	215.48	13.421	179.314	76.261	511.393	292.271
-1.23377		663.207	0	964.157	275.407	386.211	55.21	337.926	214.427	309.192	176.154	128.434	170.672	513.806	53.778	878.123	25.948	109.118	0	136.5	0	229.053	29.348	1351.43	755.374	354.247	174.355	197.986	97.495	456.954	104.45	118.219	80.162	444.931	51.273	329.304	50.939	308.836	134.38	719.6	222.387
-1.16883		830.983	42.039	1086.02	240.686	556.461	101.127	530.322	246.693	462.307	109.346	190.508	139.959	640.983	89.865	1015.16	33.839	194.633	80.224	164	108.5	269.78	42.685	1466.65	852.101	420.664	153.874	271.947	134.208	640.648	64.892	229.205	66.325	639.116	139.225	435.933	89.475	489.974	169.837	827.664	208.038
-1.1039		1036.16	57.909	1075.57	230.053	687.627	77.99	672.671	302.92	538.73	148.616	213.647	203.803	766.708	0	1273.69	128.136	285.42	126.745	214	118	401.688	82.339	1684.47	820.01	464.129	198.88	499.792	138.597	782.942	180.531	320.866	113.412	801.619	167.508	689.364	91.535	633.935	261.487	940.987	293.085
-1.03896		1111.32	36.252	1341.06	286.099	821.718	24.236	835.118	331.478	689.538	238.193	286.238	268.475	959.899	51.628	1511.75	233.215	367.787	78.846	338	121	501.424	78.549	1902.65	877.192	626.189	249.118	708.664	155.071	1069.26	235.105	377.071	52.336	916.388	111.75	944.135	154.83	963.015	316.791	1105.48	382.134
-0.974026		1306.19	42.445	1462.14	203.861	1003.76	114.918	1108.34	404.449	780.038	290.539	501.582	283.517	1336.52	181.333	1740.89	311.468	468.757	117.923	493	220	649.987	187.921	2124.56	1003.47	624.958	434.317	939.762	253.653	1274.21	285.151	568.256	134.249	1066.5	114.086	1294.77	205.661	1123.36	393.578	1244.76	428.938
-0.909091		1562.91	110.555	1496.29	313.074	1272.35	217.752	1304.53	425.92	887.307	334.308	752.902	346.221	1677.98	268.104	2010.32	302.853	499.899	67.047	642	207.5	736.164	218.983	2379.27	1292.1	880.605	496.234	1288.43	312.136	1558.69	381.879	748.97	195.056	1412.71	194.1	1487.73	323.218	1373.37	452.531	1354.26	489.862
-0.844156		1866.99	93.241	1602.1	280.62	1532.19	252.48	1560.3	485.547	1080.81	332.154	903.147	431.607	1915.74	263.222	2144.13	392.949	617.763	214.615	778.5	270	924.016	234.304	2555.88	1240.66	980.855	465.627	1554.21	357.971	1791.74	433.945	1001.32	179.932	1467.47	187.959	1793.81	443.789	1594.49	505.557	1497.72	519.854
-0.779221		2157.07	166.814	1777.26	299	1690.95	341.459	1639.28	677.02	1237.23	398.654	1054.26	516.943	2155.27	307.031	2339.35	447.783	684.443	239.656	905.5	418	1270.16	272.77	2702.19	1428.43	988.571	538.979	1728.74	510.797	2041.21	576.772	1268.71	255.685	1676.49	266.244	2144.32	463.577	1892.77	567.288	1555.12	635.258
-0.714286		2512.4	172.453	1949.57	339.123	1879.17	486.753	1832.35	751.2	1541.88	520.923	1251.6	626.328	2462.69	423.625	2536.77	475.776	858.84	303.077	1068.5	442.5	1528.84	329.579	3023.62	1591.1	1063.99	584.501	2032.38	586.36	2425.29	728.324	1510.63	304.096	1908.61	342.822	2454.35	533.871	2410	718.872	1688.85	789.898
-0.649351		2978.93	311.634	2092.5	420.661	2072.21	718.026	2129.96	942.795	1871.08	519.385	1524.45	687.394	2826.98	507.757	2959.6	522.572	1004.29	293.964	1270.5	599	1737.48	377.214	3277.94	1796.86	1266.8	686.073	2557.05	758.445	2772.38	821.141	1732.7	344.089	2139.54	358.325	2781.54	596.157	2628.18	892.93	1872.98	1022.11
-0.584416		3569.99	363.079	2270.62	475.847	2316.07	1086.34	2494.98	1146.56	2081.69	626.693	1924.2	818.123	3330.35	884.833	3400.27	654.859	1123.84	258.597	1574	1074.5	2046.28	447.227	3567.74	2126.18	1486.18	929.051	2769.27	961.589	2946.29	930.631	2070.25	409.192	2415.47	548.577	3158.76	719.431	2921.36	1119.41	2089.44	1323.18
-0.519481		4098.77	525.137	2666.69	547.661	2557.98	1637.85	3080.73	1311.98	2308.54	678.154	2236.28	1008.65	3867.69	1407.41	3698.97	792.726	1238.18	337.905	2046.5	1814	2392.47	583.166	3925.67	2518.19	1680.77	957.476	3422.91	1037.75	3283.3	1141.55	2308.66	509.37	2685.56	617.881	3545.87	1019.68	3169.75	1308.17	2381.05	1534.99
-0.454545		4409.39	752.141	3077.93	810.741	3031.94	2317.54	3884.56	1794.41	2732.15	949.693	2723.28	1162.03	4426.32	1942.93	3989.81	823.099	1439.64	548.739	2586	2654.5	2998.84	868.67	4349.85	3327.59	1797.56	1134.76	3937.86	1348.68	3501.31	1527.88	2683.22	598.208	2945.49	921.906	4172.25	1323.55	3442.3	1587.32	2606.64	1786.66
-0.38961		4815.65	1037.82	3317.55	1382.58	3775.26	2944.01	4945.96	2297.7	3124.08	1161.19	3446.39	1394.37	5166.32	2373.38	4442.01	1299.83	1579.56	1002.28	3046.5	3313	3733.61	1505.71	4740.01	4219.21	1999.26	1405.76	4364.46	1938.01	3999.99	2360.7	3127.8	791.631	3298.58	1264.9	4981.34	1709.15	3933.44	1997.38	2872.59	2448.08
-0.324675		5593.55	1627.23	3489.64	2545.67	4651.4	3693.23	6079	3123.92	3819.88	1649.85	4232.52	2362.28	6001.65	2511.75	5036.1	2368.55	1823.48	2120.78	3834	3868.5	4534.55	2975	5397.58	5811.01	2214.86	2182.43	4659.37	3422.3	4594.32	3552.76	3552.19	1050.92	3723.07	1818.98	5852.41	2677.2	4590.84	2563.83	3259.37	3704.49
-0.25974		6341.12	3422.65	3750.43	4549.65	5181.38	4651.57	7208.87	4117.65	4465.92	2668.04	4975.23	4650.26	6788.69	3153.85	5762.68	4473.21	2100.99	4236.73	5049.5	4923.5	5250.54	5388.97	6163.02	8975.24	2829.71	3934.74	5257.06	6112.12	5106.88	5279.79	3986.36	1816.15	4276.6	3044.94	6787	4209.36	5199.88	3500.2	3529.7	6291.34
-0.194805		6803.66	6304.89	4172.6	7435.9	5793.89	5674.83	8162.7	5468.38	5271.96	5213.08	5466.53	8193.16	7405.58	5041.33	6289.92	7583.5	2437.1	7147	5994.5	7029	5860.98	8348.8	6800.83	13884.1	3162.42	6579.8	6071.03	9846.13	5681	7477.28	4460.9	2860.79	5049.42	4967.64	7412.22	6500.65	5985.43	4623.06	3919.5	10832
-0.12987		7286.82	9853.03	4751.8	10858.6	6382.34	6785.69	8745.28	7171.04	5991.54	9375	5938.86	12135.6	8038.32	8038.97	6547.01	11099.7	2833.07	10502.9	6514.5	9833.5	6455.56	11103.9	7332.1	19073.2	3509.95	9796.1	6972.78	13227.2	6456.6	9619.06	5132.01	3846.24	5747.15	7029.55	8126.48	9479.09	6639.18	6092.39	4495.59	15658.3
-0.0649351		7843.23	13361.8	5212	13283.4	7185.55	7917.78	9121.01	8585.98	6621.27	14155.3	6318.85	14807.5	8311.17	10768	6728.73	13599.7	3142.9	12864	6891	12335	7000.02	12732.4	7728.75	22077.2	4020.71	12326.3	7503.14	15233.5	7036.32	11545.5	5894.12	4461.22	6341.22	8479.74	8898.54	12570.2	7292.49	7346.78	5159.24	19221.2
0		7954.82	15200.1	5390.46	13678.8	7365.76	8250.7	9201.92	9187.36	6663.54	17102.8	6343.69	15284.2	8560.65	11598	6764.82	14234.3	3256.21	13345.1	6909	12870.5	7143.02	12750.8	8046.28	22202.8	4342.63	13116.2	7509.51	15691	7155.72	12279.1	6352.87	4474.12	6669.64	8895.52	9487.03	14520.2	7431.46	8048.33	5521.67	19950.4
0.0649351		7901.71	15078.5	5328	11457.7	7246.43	7872.15	8794.55	8511.32	6483.77	16755.4	6249.14	13756.3	8354.01	10041.3	6724.1	12916.1	3023.11	11517.8	6728	11351.5	6911.73	11490.8	7965.17	18896.6	4320.78	12545.2	7150.48	14780.1	6989.21	11667.7	6222.3	3693.46	6512.24	8198.76	9397.82	14226.9	7280.24	7752.7	5515.24	17965
0.12987		7715.37	13057.9	5108.84	7768.35	6763.42	6629.67	8162.86	6978.44	5791.85	14284	5984.17	11463.2	7886.48	6983.89	6344.21	10297.2	2771.9	8597.52	6636	9136	6332.89	9277.86	7651.62	13645.7	4044.94	10213.2	6755.72	12791.7	6743.78	10423.6	5832.4	2692.3	6137.2	6691.1	8951.88	11813	7166.53	6812.14	5493.72	15417.3
0.194805		7412.72	10184.7	4971.97	4876.35	6220.7	4880.23	7544.28	4939.71	5194.85	10654.8	5584.65	9235.64	7034	4516.67	5830.69	7341.72	2405.13	5702.45	6121	6924	5549.81	6568.57	7040.74	8774.74	3738.07	7578.35	6513.43	10081.6	6152.53	8871.64	5284.42	1834.52	5512.87	4707.08	8006.88	8570.89	6705.56	5636.97	5317.83	12922.6
0.25974		6891.41	7265.12	4487.54	3191.76	5654.45	3148.09	6425.44	3909.7	4404.23	7660.35	5117.08	7159.74	6114.55	3061.32	5298.52	4611.45	2132.73	3792.76	5391	5157.5	4784.01	4120.61	6433.78	5152.74	3444.63	5602.7	6134.86	6903.07	5262.43	7109.52	4620.22	1125.94	4935.89	3134.76	7055.68	5813.56	6181.32	4572.76	4820.87	10694.6
0.324675		6296.88	4894.34	3982.39	2221.45	5058.55	2147.64	5433.12	3265.72	3892.81	4729.15	4741.49	5431.8	5387.89	2218.83	4542.62	2619.38	1883.8	2566.32	4836.5	3729	3967.47	2443.22	5463.02	3115.51	3067.1	4140.71	5507.35	4217.55	4519.13	4800.06	4003.45	737.584	4322.33	2114.65	6026.2	4039.97	5675.04	3519.28	4406.76	7895.6
0.38961		5618.64	3461.25	3517.56	1569.53	4347.9	1586.58	4630.28	2631.57	3442.85	2809.65	4493.5	4174.03	4573.15	1549.59	3946.02	1594.35	1611.37	1788.84	4211.5	2604	3318.85	1722.19	4652.1	2085.22	2545.23	2944.26	4866.09	2463.58	3996.47	2816.73	3539.17	547.485	3850.99	1548.4	5366.72	3083.63	4850.36	2696.94	3817.35	5129.74
0.454545		4875.16	2523.98	3059.88	1257.16	3818.63	1227.3	3885.11	2269.68	2878.08	1727.15	4026.51	3189.86	3954.87	1014.5	3463.42	1289.54	1417.4	1257.58	3676.5	1819	2717.78	1381.19	3899.2	1633.65	2092.67	2066.67	4177.42	1624.58	3298	1520.22	3126.6	475.934	3247.47	1245.88	4605.13	2395.46	4185	1889.9	3473.72	3173.35
0.519481		4232.23	1885.63	2743.03	1018.32	3537.48	955.425	3478.17	1851.24	2416.92	1134.31	3502.6	2364.35	3295.02	853.156	3029.49	1154.26	1239.01	790.745	3284	1338.5	2116.66	1087.39	3269.12	1119.32	1858.39	1636	3471.72	1224.52	2642	954.837	2739.87	346.164	2841.77	915.675	4199.21	1802.94	3641.71	1503.48	2983.02	2125.9
0.584416		3634.76	1463.11	2450.55	805.272	3176.89	782.233	3112.84	1595.53	2062.73	950.154	3071.44	1772.47	2928.61	868.75	2727.58	954.381	1190.88	552.479	2855	1097	1627.35	760.881	2652.01	901.485	1539.89	1373.81	2942.02	935.002	2303.41	776.833	2333.34	279.035	2554.55	788.523	3748.13	1370.63	3225.2	1124.47	2629.56	1636.38
0.649351		2972.4	1190.8	2228.46	593.578	2832.11	654.609	2671.08	1507.3	1857.54	881.846	2599.49	1385.77	2607.68	667.896	2448.59	923.377	1009.91	488.219	2531	991.5	1398.52	652.257	2183.3	758.828	1234.19	1147.22	2595.68	743.199	2106.93	632.639	2046.41	271.525	2271.04	618.3	3451.16	1141.3	2869.03	961.945	2196.63	1302.16
0.714286		2501.43	963.103	1971.17	411.696	2559.06	558.487	2367.01	1351.92	1634.04	773.77	2232.42	1137.68	2392.46	447.444	2089.85	804.054	784.307	422.94	2297	886.5	1095.22	560.703	1783.89	632.899	1052.96	991.196	2394.2	631.155	1779.18	510.27	1723.54	276.189	2105.37	569.533	3081.12	1018.02	2605.49	795.524	1913.4	982.334
0.779221		2180.03	707.004	1682	256.698	2139.92	430.626	2091.64	1148.91	1424.54	620.308	1870.12	950.09	2114.77	386.75	1747.78	759.887	784.899	277.047	2088.5	725.5	889.287	509.619	1463.65	469.192	963.752	852.811	2220.39	613.275	1473.12	483.588	1451.63	253.656	1801.24	525.444	2658.83	924.992	2227.44	664.322	1720.16	826.338
0.844156		1873.75	504.713	1482.07	234.597	1767.27	320.987	1914.17	1060.76	1144.04	666	1560.82	734.975	1736.18	352.292	1454.58	618.051	614.195	254.378	1928.5	565.5	685.105	443.737	1231.49	311.646	841.826	781.687	1966.52	536.797	1202.82	422.631	1241.54	208.923	1548.21	466.213	2298.49	776.74	2012.53	554.451	1437.72	730.991
0.909091		1618.55	490.31	1285.74	197.793	1453.57	264.779	1611.71	1010.26	1035.23	526.346	1299.64	579.869	1491.98	225.562	1077.1	531.485	515.426	224.727	1789.5	563	550.783	326.058	1021.95	262.515	660.991	627.914	1643.38	429.602	940.472	347.54	1111.57	194.738	1335.41	423.8	2028.62	679.882	1820.82	495.792	1229.32	548.174
0.974026		1399.22	392.441	1121.44	153.273	1201.35	304.288	1363.14	943.169	774.884	450.846	1009.41	457.754	1417.67	229.333	795.265	337.782	368.13	174.52	1578	632.5	467.243	365.384	808.647	204.04	532.894	557.63	1509.54	394.437	768.817	281.429	933.998	228.397	1159.39	327.086	1842.17	637.671	1684.89	471.925	979.756	437.938
1.03896		1147.53	359.379	918.607	173.351	1058.91	237.397	1072.45	876.86	582.615	421.731	817.336	368.017	1177.93	277.167	582.47	288.039	323.532	117.266	1305	473	384.922	325.899	653.424	184.192	425.05	403.193	1262.76	360.811	597.026	272.321	786.252	224.652	1006.26	265.387	1605.97	561.962	1616.72	430.298	717.031	299.905
1.1039		958.934	292.111	695.703	133.735	997.256	226.88	861.511	822.84	442.73	363.077	697.762	274.959	989.285	231.972	447.454	298.725	257.65	37.68	1081	363.5	323.71	268.8	503.778	124.909	393.617	357.994	1124.84	308.144	437.413	195.428	636.419	186.427	913.819	206.717	1350.37	491.522	1457.58	345.309	556.72	295.351
1.16883		810.039	242.69	527.915	88.545	866.132	207.903	663.282	803.322	369.692	379.193	548.098	194.738	726.566	165.396	281.211	217.645	151.189	53.148	885	361.5	278.746	192.725	314.828	143.101	270.941	345.278	877.992	354.557	267.972	158.317	488.908	156.45	755.588	193.9	1077.92	465.57	1246.33	321.363	310.929	302.598
1.23377		659.541	237.12	423.661	0.508	745.012	205.795	663.58	822.2	312.423	281.616	393.68	138.189	551.878	145.833	249.984	162.974	98.952	93.384	678	326.5	213.203	184.873	243.657	121.101	192.031	303.146	674.944	209.12	179.655	171.605	377.818	106.914	579.869	126.803	899.905	380.429	1111.59	315.619	268.08	201.56
1.2987		430.91	164.374	298.801	49.029	647.509	203.327	577.326	607.649	248.923	251.5	325.664	16.197	478.941	149.177	149.012	146.809	83.284	111.26	576	296.5	137.539	212.113	180.798	57.02	121.332	211.492	536.904	184.813	214.238	175.72	255.708	133.038	520.953	126.756	778.736	328.115	1093.24	204.326	198.44	143.494
1.36364		255.801	94.225	95.752	63.472	487.894	135.028	547.542	639.667	123.115	256.231	243.467	0	330.139	132.25	50.361	113.934	46.248	88.077	501	270.5	113.588	163.045	93.192	60.929	80.543	114.328	459.026	204.066	178.558	145.047	220.994	88.128	428.756	79.084	635.725	264.001	974.442	178.055	107.987	90.938
1.42857		144.047	78.469	36.543	0	361.914	113.102	410.593	658.4	49.692	290.346	130.303	1.434	185.649	96.448	0	95.201	17.633	61.556	422	220.5	80.83	133.126	73.343	22.283	14.426	119.666	325.352	158.503	108.484	111.901	238.041	85.319	312.567	44.85	519.145	292.035	850.861	178.877	39.053	29.227
1.49351		0	80.952	0	40.404	284.252	131.45	300.726	532.929	89.5	185.693	57.721	3.746	13.368	63.778	13.235	108.434	0	66.272	349.5	176	55.47	157.341	0	0	0	68.522	298.045	126.397	36.815	89.259	164.186	31.075	165.119	0	308.283	225.826	694.12	178.316	0	0
