# Supplementary material for: Cell cycle-specific loading of condensin I is regulated by the N-terminal tail of its kleisin subunit
Source: eLife. 2022 Dec 13;11:e84694. doi: 10.7554/eLife.84694 (PMC9797191; doi:10.7554/eLife.84694)
Supplement: Figure 2—source data 1. [file elife-84694-fig2-data1.xlsx]

## Sheet: Figure 2B
Figure 2-source data 1
Figure 2B
Raw DAPI area and mSMC4 intensity values
		35 nM holo(WT)_30 min					35 nM holo(WT)_150 min
		DAPI (overall)	mSMC4 (overall)				DAPI (overall)	mSMC4 (overall)
Chromosome cluster					Chromosome cluster
1		141603	389254490		1		146588	919030933
2		127549	665691429		2		70670	293758201
3		182547	875436732		3		66800	340701142
4		141551	718290297		4		81050	493646879
5		181815	933777147		5		72248	445245982
6		134303	757232834		6		97206	350164357
7		102270	496131412		7		78678	383863891
8		121119	708494216		8		51474	394039334
9		163017	822864900		9		125621	818525114
10		183690	883966713		10		89273	716805350
		35 nM holo(H-dN)_30 min					35 nM holo(H-dN)_150 min
		DAPI (overall)	mSMC4 (overall)				DAPI (overall)	mSMC4 (overall)
Chromosome cluster					Chromosome cluster
1		149810	1127673264		1		63868	587734431
2		119366	870570893		2		37102	357388709
3		102163	1030328974		3		78732	769673094
4		132834	1527470290		4		108776	1520350342
5		129151	1056561737		5		131527	1145996348
6		95120	1027179805		6		76554	1197903420
7		110884	1244837873		7		94316	1297762809
8		154346	1373889307		8		109801	1358626092
9		143880	1364040762		9		88522	928467992
10		120380	1371327101		10		152508	2144381204
		35 nM holo(H-N19A)_30 min					35 nM holo(H-N19A)_150 min
		DAPI (overall)	mSMC4 (overall)				DAPI (overall)	mSMC4 (overall)
Chromosome cluster					Chromosome cluster
1		151647	96354570		1		102966	324035403
2		148526	60320270		2		101118	113612044
3		164910	319907986		3		92221	176991796
4		166441	70358161		4		102075	238328099
5		161855	131499934		5		53413	53714621
6		179274	242923865		6		78735	67512515
7		192184	322117353		7		47991	81675911
8		122451	80725847		8		18636	14823568
9		114288	61083958		9		75590	76701082
10		180131	279408187		10		64697	146718754
