# Supplementary material for: Cell cycle-specific loading of condensin I is regulated by the N-terminal tail of its kleisin subunit
Source: eLife. 2022 Dec 13;11:e84694. doi: 10.7554/eLife.84694 (PMC9797191; doi:10.7554/eLife.84694)
Supplement: Figure 2—source data 2. [file elife-84694-fig2-data2.xlsx]

## Sheet: 35nM holo(WT)
Figure 2-source data 2
Figure 2C
Non-normalized values
	35 nM holo(WT)_150 min
Chromosome sample		1		2		3		4		5		6		7		8		9		10		11		12		13		14		15		16		17		18		19		20
		DAPI	mSMC4	DAPI	mSMC4	DAPI	mSMC4	DAPI	mSMC4	DAPI	mSMC4	DAPI	mSMC4	DAPI	mSMC4	DAPI	mSMC4	DAPI	mSMC4	DAPI	mSMC4	DAPI	mSMC4	DAPI	mSMC4	DAPI	mSMC4	DAPI	mSMC4	DAPI	mSMC4	DAPI	mSMC4	DAPI	mSMC4	DAPI	mSMC4	DAPI	mSMC4	DAPI	mSMC4
Distance (µm)
-1.49351		0	0	0	0	765.77	0	332.523	58.319	0	0	253.078	195.929	122.026	30.915	322.367	24.25	1.8	18.352	469.995	42.944	0	68.367	0	0	196.905	172.4	523.155	15.506	0	17.365	0	0	174.197	101.176	217.565	0	280.969	6.668	101.976	0
-1.42857		19.503	35.168	64.572	43.693	804.282	26.924	424.016	58.829	0.706	23.172	389.171	182.823	258.637	59.337	322.517	61.034	0	15.745	493.179	52.156	70.43	48.797	59.175	4.355	105.196	204.654	623.619	18.056	39.776	0	142.229	26.482	281.233	134.986	286.646	23.184	266.947	6.629	82.233	59.133
-1.36364		77.649	82.121	187.428	54.369	828.751	60.592	465.427	88.98	68.182	46.226	455.463	268.529	328.017	39.682	335.934	100.417	1.587	13.091	483.731	73.309	50.344	0	72.289	27.615	101.768	199.489	669.063	74.899	43.025	9.834	215.045	40.584	243.49	132.823	289.355	66.979	297.768	1.432	88.861	3.663
-1.2987		257.135	101.343	297.44	76.912	1047.94	97.255	487.564	121.223	87.759	107.222	524.428	270.799	339.506	51.6	424.917	53.2	39.705	0	565.568	60.549	133.422	7.547	66.057	50.253	90.137	203.957	660.914	103.378	211.93	50.317	324.005	10.044	281.712	237.573	338.853	70.174	467.383	98.365	97.493	35.471
-1.23377		335.866	108.829	510.675	102.844	1153.53	117.56	576.504	119.101	169.399	43.752	678.169	258.41	410.214	91.509	532.434	115.75	75.618	46.889	669.004	87.068	193.313	48.203	69.692	57.204	101.908	303.222	773.802	142.479	141.857	31.174	480.311	58.66	382.691	295.196	415.553	57.651	474.452	104.107	99.878	67.343
-1.16883		358.027	120.078	767.46	124.149	1244.22	117.31	738.063	143.754	291.459	90.458	879.871	259.958	527.723	84.168	545.167	82.167	130.702	73.505	673.191	99.901	233.586	49.891	62.554	96.385	264.783	183.874	928.107	145.886	156.478	32.694	810.071	76.867	572.744	244.758	520.101	47.835	552.885	146.823	160.535	148.043
-1.1039		520.214	125.345	971.245	181.146	1315.59	136.374	815.531	157.782	382.645	70.13	927.624	318.385	644.379	170.089	609.667	164.4	267.898	74.821	756.411	117.792	426.969	107.836	99.906	99.114	307.865	204.788	1141.17	197.596	224.702	74.667	1095.55	176.786	634.884	298.717	577.108	47.437	628.318	213.421	191.868	161.745
-1.03896		629.239	160.689	1290.38	251.34	1505.74	181.468	968.991	168.63	471.011	102.055	1131.08	356.195	705.917	168.826	934.134	161.8	466.673	86.788	845.3	119.584	673.586	73.547	239.281	143.672	397.595	193.606	1421.32	269.824	298.376	103.58	1203.51	191.226	697.39	265.204	770.477	30.035	721.265	237.759	242.998	152.585
-0.974026		865.085	175.663	1449.87	337.447	1714.68	225.628	1159.69	200.967	608.179	209.872	1440.2	334.293	980.089	179.599	1193.1	166.867	606.673	130.589	1001.54	157.178	1059.28	71.57	429.813	149.167	475.846	237.703	1661.8	338.656	399.235	88.44	1461.81	207.989	915.315	282.258	941.621	133.593	825.699	281.962	298.833	266.607
-0.909091		1069.85	255.022	1777.43	520.812	2158.22	287.962	1512.98	226.95	932.297	250.455	1852.68	368.27	1329.97	263.27	1643.27	229.034	955.004	176.518	1241.12	162.567	1519.15	157.735	587.473	218.969	583.014	310.045	1843.45	407.731	523.88	80.153	1812.99	258.445	1122.6	354.037	1245.32	135.793	982.619	380.719	397.037	250.151
-0.844156		1383.49	375.694	1975.15	730.039	2600.51	337.742	1833.48	274.085	1139.38	372.087	2403.94	437.973	1946.79	325.214	1968	335.434	1364.91	175.99	1468.94	225.788	1994.34	193.406	909.076	250.997	960.784	299.279	2378.4	406.169	868.46	150.351	2249.18	276.539	1344.96	386.94	1568.81	143.817	1405.36	469.148	564.108	253.373
-0.779221		1938.26	435.853	2489.4	926.543	2943.22	390.675	2158.94	418.71	1564.21	528.67	2824.06	508.944	2477.6	379.837	2400.65	488.567	1896.43	220.624	1747.23	293.542	2474.7	193.547	1173.14	307.579	1387.12	320.808	2862.25	493.061	1180.23	202.318	2868.26	340.072	1521.6	522.557	2021.37	171.538	1794.83	686.294	809.572	358.93
-0.714286		2294.05	568.936	2958.46	1259.72	3378.84	488.59	2506.83	447.484	2113.94	706.236	3404.32	548.787	3208.41	380.606	2899.87	637.5	2504.52	341.424	2191.34	284.873	2954.53	270.07	1539.06	418.182	2017.84	374.12	3339.67	693.409	1632.62	297.68	3457.22	417.914	1843.62	823.667	2712.46	228.803	2285.38	856.333	995.421	453.737
-0.649351		2596.19	790.63	3473.51	1726.76	3809.73	562.325	2965.84	637.044	2665.21	960.376	4133.28	610.67	4124.86	415.919	3311.62	742.367	3238.04	499.837	3009.49	302.542	3537.29	278.109	1976.75	617.956	2591.1	416.361	3942.01	889.894	2292.51	282.421	4046.01	413.486	2314.74	1097.35	3488.89	217.692	2933.1	937.075	1267.33	512.921
-0.584416		3127.68	1146.66	3837.94	2418.67	4289.96	693.229	3519.1	796.815	3261.91	1277.28	4623.43	654.157	5020.4	488.764	3649.27	1016.57	4077.18	869.878	3695.28	444.153	4015.22	292.188	2735.77	803.907	3209.4	560.075	4651.96	1193.63	2899.9	342.735	4717.77	569.584	3064.62	1514.74	4387.88	253.967	3634	1213.72	1611.81	630.868
-0.519481		3737.61	1851.37	4312.65	3091.07	4771.73	1003.89	4151.68	887.176	3871.95	1688.57	5543.46	732.292	5893.9	532.862	4191.87	1146.53	5228.89	1419.91	4285.44	604.48	4973.86	393.422	3538.54	1146.73	3979.62	796.343	5654.56	1897.43	3486.2	579.149	5224.07	799.718	3957.82	2136.21	4903.64	347.712	4382.11	1555.66	2123.04	750.402
-0.454545		4179.63	2563.24	4621.88	3850.76	5559.05	1111.71	4599.31	1202.82	4737.67	2415.63	6499.84	1064.85	7029.45	613.139	4905.73	1374.63	6587.02	2178.99	5220.33	944.064	6041.06	451.359	4149.76	1857.93	4690.87	1097.21	7106.6	3216.34	4301.98	1110.2	5809.1	1316.46	5211.65	3334.76	5665.17	331.393	5136.48	2110.68	2589.78	942.813
-0.38961		5150.89	3555.54	5028.72	4858.07	6727.76	1466.65	5373.68	1694.66	5679.6	3103.24	7794.45	1670.97	8269.67	837.732	5723.6	1916.17	7731.88	2902.47	6210.23	1539.95	7036.25	544.391	4786.69	3210.58	5444.93	1496.36	8748.91	5209.94	5648.87	2157.73	6319.97	2324.86	6409.34	4805.7	6704.36	682.944	5698.19	2870.11	2976.61	1280.95
-0.324675		6276.39	4767.27	5487.08	6214.27	8161.01	1995.28	6393.74	2421.42	6912.14	4056.31	9091.77	2848.42	9924.76	1240.15	7103.67	3006.78	8844.16	3690.43	7441.16	2454.07	8279.59	1140.53	5449.19	5217.08	6472.72	2092.89	10628.1	7670.46	7145.5	3573.47	6784.27	4292.94	8086.94	6220.76	7961.01	1143.82	6206.94	3981.8	3458.92	2090.31
-0.25974		7602.85	6505.88	5801.51	7802.66	9564.71	2713.74	7512.93	3333.73	8415.27	5063.41	10789.5	4721.13	11779.7	2107.13	7850.68	4282.87	9297.04	4489.85	8465.12	4051.24	9616.33	2564.3	6028.73	7817.86	7552.09	3012.95	11958.3	9369.4	8750.48	5293.81	7369.74	7397.37	10098.8	7136.1	9235.51	1949.44	6566.35	5437.53	4120.92	3474.08
-0.194805		8469.07	8141.48	6257.05	9423	11196.8	3617.34	8909.29	4386.92	10625.7	6198.04	12095.6	7529.56	13257.5	4191.5	8243.43	5962.82	9723.51	5169.98	9740.84	5743.17	10912.2	4621.29	6838.37	10356.3	8790.55	5028.44	13131.7	11540.7	10611.7	7600.17	7849.38	11262.3	11872.6	7456.08	10317.5	3164.17	6850.76	7380.79	4874.96	5560.14
-0.12987		8765.38	9313.14	6540.36	10741.8	12380.8	4562.11	10374.8	6029.09	12892.4	7380.22	13430.5	10132.6	14555	7075.54	8573.32	7602.23	9685.07	5494.01	11191.5	7743.72	12090.2	6706.89	7582.89	12183.3	10018.1	7729.09	13649.1	13546.2	11216	9540.68	8049.01	14901.9	13007.6	7618.23	10940.5	5126.08	7118.11	9736.4	5894.97	8565.1
-0.0649351		8987.57	10106.8	6902.27	12045.2	12886.3	5693.05	11272.2	7599.78	14477	8287.38	14423.2	12254.3	15703.9	10182	8596.8	8971.08	9607.16	5507.26	11991.2	9420.39	13042.5	8247.62	8414.27	13533.4	11016.5	9990.07	14027.4	15433.6	11851.9	11712	8291.37	17429.7	13056.5	7800.68	11572.1	6408.56	7120.85	12012.6	6742.59	11159.4
0		9405.72	10247	7195.68	12810.9	13087.1	6678.74	11453.8	8075.91	14689.2	8476.27	14641.5	12923.4	15932.3	12492.4	8728.27	9384.87	9519.18	5037.53	12527.1	9900.1	13345.4	8571.92	8507.03	14312.9	11487.6	10213.8	14244.1	16058.5	12362.2	12976.2	8458.21	17781.5	13132.4	7841.82	11986.2	7133.61	7135.2	13312.4	6989.93	12500.4
0.0649351		9384.16	9976.56	6795.84	12635.4	12627.7	6610.85	11086.1	7742.01	13245.8	7779.66	14486.7	12196.1	15723.2	12344.1	8415.27	8624.35	8951.64	4334.26	12292.9	8993.48	12932	7234.49	8437.51	13985.7	11050	8547.87	14156.7	14905.9	12296.2	12606.8	8343.2	15470.3	12851.1	6882.35	11492.4	6775.38	7073.41	13102.4	6485.94	11608.3
0.12987		8858.85	9645.19	6185.03	11502	11644.8	6373.54	10121.2	7029.86	11394	6851.19	13850.6	10244.2	14964.1	9359.05	8234.82	7485.9	8404.19	3766.73	11604.2	7010.54	12161.5	5696.61	8387.95	11806.6	9835.36	5827.44	13541.8	12698.2	12024.6	10819.7	8182.91	11655.8	12707.3	4980.17	10640.6	5946.39	6810.33	11496.9	5566.18	9231.34
0.194805		8209.66	9021.46	5572.59	9840.25	10521.4	5942.74	9039.62	5977.72	9484.29	5623.61	13327	7595.66	13922.6	5855.98	7820	6433.52	7631.7	3076.34	10424.5	4461.24	11041.8	4210.41	7890.03	8333.29	8562.45	3528.86	12722.7	9914.89	11396.1	8439.24	7766.1	7370.08	12346.3	3051.77	9701.71	4989.52	6427.57	9396.05	4575.89	6132.25
0.25974		7300.47	7589.8	4782.33	7852.2	9499.97	5537.06	7844.47	5062.57	7868.95	4541.77	12133.4	5236.27	12775	3093.65	6904.07	5513.9	6764.86	2315.56	9058.98	2695.5	9983.77	2791.55	7228.96	5365.1	7356.94	2288.89	11448.8	7484.62	10635	6013.67	7124.96	4074.68	11639.3	1880.99	8707.68	3962.1	5856.72	7233.21	3783.21	4078.52
0.324675		6193.74	5783.93	4035.71	6026.12	7692.38	4888.69	6958.47	4143.38	6409.24	3684.09	10449.1	3440.34	11591.2	1694.88	6345.63	4115.28	5894.09	1692.57	7965.97	1663.35	8763.84	1954.25	6610.91	3307.98	6543.03	1766.74	9632.09	5246.38	9676.43	3951.18	6426.7	2115.77	10132.2	1423.6	7395.85	2908.8	5106.43	5320.01	3217.34	2646.63
0.38961		5341.89	4283.75	3302	4279.37	6398.69	4238.31	6115.94	3320.21	5441.09	2961.45	8806.17	2222.49	9970.87	1321.58	5445.35	3270.97	4986.03	1195.54	6984.98	1085	7795.24	1402.49	6046.68	2244.89	5779.62	1389.31	7989.05	3293.36	8176.59	2466.46	5774.31	1201.81	8818.89	1124.57	6505.32	1827.8	4278.45	3647.34	2790.28	2021.75
0.454545		4735.78	3119.49	2794.91	2799.29	5247.02	3538.58	5298.65	2705.21	4589.24	2217.63	7488.09	1528.03	8238.13	1133.1	4685.27	2294.47	4201.97	847.124	5732.4	802.371	6839.72	1048.86	5290.68	1734.08	4887.72	938.022	6577	2100.72	6915.47	1580.21	5255.99	865.959	7551.23	873.913	5377.08	1070.05	3648.94	2417.51	2289.52	1518.52
0.519481		3978.83	2467.08	2444.98	2203.94	4289.32	3015.35	4614.5	2079.57	3768.02	1670.36	6222.7	1072.17	6677.8	819.314	3951.95	1597	3412.67	664.884	4543.18	655.824	5914.73	848.797	4708.84	1346.17	4425.53	817.339	5452.33	1452.53	5704.7	1127.32	4615.55	686.688	6333.06	654.763	4439.29	711.642	3077.79	1635.18	1969.77	1225.65
0.584416		3337.65	1854.62	1990.77	1684.95	3586.52	2480.51	3696.48	1499.09	3152.24	1350.4	5221.38	851.822	5309.53	609.039	3461.7	1305.67	2805.01	510.397	3569.42	464.797	5149.66	677.422	4090.1	1098.05	3856.77	643.614	4520.08	1117.22	4782.54	902.153	3986.55	608.341	5630.41	484.068	3673.61	668.644	2465.28	1259.24	1695.98	870.307
0.649351		2564.81	1439.8	1721.76	1299.06	3027.6	1910.38	3215.18	1255.97	2620.14	1047.15	4369.27	749.062	4194.45	513.229	3011.87	1029.03	2227.07	395.708	2682.28	334.619	4524.54	602.453	3571.8	971.621	3193.4	543.569	3652.51	883.313	3942.12	676.467	3408.59	524.06	4938.72	429.022	2840	543.358	1947.42	967.975	1343.17	698.819
0.714286		2048.57	1080.38	1491.76	933.257	2410.79	1574.36	2766.72	849.647	2150.19	825.207	3496.46	585.735	3418.12	459.451	2455.27	786.867	1756.61	361.636	1951.18	299.428	3756.84	550.359	2905.66	815.941	2586.54	452.67	2957.94	708.872	3206.75	545.741	2867.12	465.261	3988.84	354.362	2197.24	424.528	1406.39	874.183	1154.1	644.587
0.779221		1576.25	849.955	1129.49	769.797	2008.64	1317.37	2218.28	572.124	1672.16	626.245	2822.6	444.34	2554.09	372.547	2021.03	601.567	1256.71	300.821	1377.23	227.836	3134.89	461.297	2557.49	693.407	2062.11	396.273	2288.81	585.823	2797.95	483.218	2310.85	381.184	3102.4	295.998	1608.12	367.169	1086.29	717.687	838.174	604.525
0.844156		1213.2	658.887	869.034	620.401	1431.31	936.972	1810.6	412.674	1378.71	504.539	2385.86	419.333	1963.47	393.665	1643.97	487.05	1116.17	252.358	972.523	203.247	2690.25	446.555	2173.37	675.351	1537.37	304.794	1853.33	443.783	2253.62	469.843	2012.43	386.462	2172.19	234.81	1107.32	332.166	1020.3	552.587	673.794	538.804
0.909091		913.514	440.337	733.981	417.599	1156.14	743.214	1490.07	288.911	1170.49	341.89	1916.11	359.054	1458.75	287.596	1355.83	436.367	976.58	211.759	676.579	155.525	2195.45	445.109	1932.81	614.885	1123.18	284.59	1593.94	396.277	1707.14	462.059	1672.29	317.255	1622.5	186.357	862.839	263.823	671.693	470.841	561.21	567.481
0.974026		775.855	406.239	564.217	295.623	906.486	566.756	1149.64	253.9	944.361	262.226	1435.49	278.238	954.323	265.209	1079.87	379.617	945.383	210.473	418.007	44.822	1874.59	408.055	1668.84	553.418	852.486	233.137	1129.66	246.683	1327.3	417.798	1312.12	273.818	1135.93	217.922	633.941	224.081	533.56	359.73	484.762	486.187
1.03896		658.752	309.185	502.185	257.586	638.011	406.201	872.545	223.143	973.895	256.546	1108.69	232.776	632.351	231.237	902.767	274.867	770.52	152.947	188.431	41.687	1366.62	351.922	1388.11	459.866	604.149	147.243	804.339	241.518	1061.26	387.618	1063.44	248.064	864.011	106.496	499.871	210.74	463.09	344.637	398.511	391.554
1.1039		445.536	232.086	423.12	201.204	460.961	299.306	626.148	135.126	744.579	201.005	662.662	206.745	559.258	244.854	706.4	138.834	603.189	132.014	138.378	95.87	1116.22	239.766	1181.84	358.766	526.187	176.801	633.054	190.367	773.589	327.907	845.323	176.505	700.463	159.813	335.524	179.587	365.254	226.551	304.271	382.614
1.16883		322.197	192.132	221.756	131.215	299.046	245.12	434.79	71.405	649.884	148.761	463.008	219.516	352.375	138.996	554.834	132.767	736.216	113.514	87.411	89.727	933.032	239.891	1096.85	360.029	384.453	192.968	431.349	129.177	612.955	241.238	622.523	161.372	475.87	159.059	144.605	160.808	218.124	198.076	226.561	370.559
1.23377		187.252	167.563	202.839	191.298	255.062	123.381	265.369	69.476	532.209	150.995	359.834	176.987	197.11	123.159	348.867	112.934	570.813	93.015	118.365	82.258	817.344	258.188	1018.17	325.372	220.352	182.597	311.159	44.017	477.734	285.117	580.189	137.477	331.411	125.035	152.731	166.893	121.708	191.173	183.955	267.612
1.2987		231.581	101.016	235.217	128.363	226.277	105.666	183.479	29.085	531.243	84.146	185.506	149.696	193.483	93.501	250.9	83.034	494.327	76.741	72.268	47.513	622.649	190.547	851.417	304.04	212.653	142.53	196.248	34.586	378.364	223.075	444.164	115.342	264.065	114.024	46.576	112.979	117.315	175.805	151.174	156.835
1.36364		150.043	99.77	216.32	74.754	88.918	40.31	52.909	12.606	443.885	24.174	59.207	115.534	75.757	90.742	228.6	17.817	454.185	80.51	32.53	34.414	538.188	144.797	819.515	366.351	56.226	0	104.697	31.508	277.817	183.805	359.947	140.603	107.501	91.705	21.275	117.734	83.576	73.313	91.185	150.94
1.42857		98.319	52.851	151.832	52.248	38.473	14.716	0	0	325.304	53.232	6.459	100.071	11.239	37.758	78.817	22.834	406.892	48.979	0	1.975	385.328	130.203	780.786	303.443	47.948	69.01	89.645	9.598	159.248	122.277	309.234	114.534	148.896	26.638	32.539	78.911	9.214	62.222	121.472	104.765
1.49351		53.518	68.473	156.389	39.813	0	3.645	20.405	6.192	285.328	63.145	0	0	0	0	0	0	262.185	41.712	16.291	0	412.344	156.883	723.971	271.4	0	88.31	0	0	86.043	190.402	228.937	113.334	0	0	0	32.05	0	0	0	184.928

## Sheet: 35 nM holo(H-dN)
Figure 2-source data 2
Figure 2C
Non-normalized values
	35 nM holo(H-dN)_150 min
Chromosome sample		1		2		3		4		5		6		7		8		9		10		11		12		13		14		15		16		17		18		19		20
		DAPI	mSMC4	DAPI	mSMC4	DAPI	mSMC4	DAPI	mSMC4	DAPI	mSMC4	DAPI	mSMC4	DAPI	mSMC4	DAPI	mSMC4	DAPI	mSMC4	DAPI	mSMC4	DAPI	mSMC4	DAPI	mSMC4	DAPI	mSMC4	DAPI	mSMC4	DAPI	mSMC4	DAPI	mSMC4	DAPI	mSMC4	DAPI	mSMC4	DAPI	mSMC4	DAPI	mSMC4
Distance (µm)
-1.49351		597.606	980.392	375.183	93.075	24.195	314.491	148.677	95.893	0	10.883	343.478	79.446	67.859	194.866	14.595	26.815	30.5	0	0	1.518	412.255	142.869	492.486	747.014	515.974	354.056	73.331	0	334.229	251.873	0	0	405.583	322.032	726.978	190.921	277.836	122.898	376	383.116
-1.42857		554.369	990.82	384.371	102.023	47.696	420.264	129.165	94.021	132.519	35.063	369.311	137.933	0	184.818	0	0	0	76.5	48.044	0	459.158	141.187	599.888	695.666	576.2	363.293	0	131.645	366.779	357.347	124.208	44.786	468.147	357.857	763.919	297.983	267.589	183.68	401.189	353.466
-1.36364		577.199	970.725	424.029	162.883	187.996	440.552	149.264	1	166.479	20.354	417.502	131.73	78.775	157.5	49.809	23.507	99	136	125.026	81.404	413.564	163.806	586.944	699.819	639.129	390.584	55.836	163.484	300.432	198.098	27.409	126.484	502.504	331.238	836.741	230.973	292.71	101.89	420.109	318.969
-1.2987		548.35	1021.87	433.758	207.532	216.779	401.291	138.467	91.045	281.894	0	533.821	142.791	132.931	198.84	49.412	91.916	166	140	121.886	96.878	428.844	267.937	578.333	676.111	752.985	433.797	316.331	142.262	370.834	278.292	113.82	74.184	537.218	359.988	927.2	229.692	255.215	243.738	528.946	362.403
-1.23377		494.428	1092.43	510.223	174.069	280.134	440.106	152.33	226.826	446.042	93.945	564.337	220.918	135.401	248.626	55.886	138.637	181	234.5	94.36	123.106	596.968	234.484	559.277	688.958	840.342	533.511	376.946	205.17	548.272	245.148	144.911	26.253	619.837	348.476	1014.52	307.573	405.126	224.846	512.026	387.433
-1.16883		511.875	981.727	728.056	208.295	370.786	442.128	185.806	203.211	613.813	105.967	587.072	201.507	226.904	275.359	68.204	144.711	289	255.5	114.991	169.886	581.703	364.889	547.444	724.166	913.752	581.288	352.074	353.423	591.094	373.421	161.467	132.458	580.837	406.155	1155.81	379.067	528.532	341.086	595.371	353.653
-1.1039		710.792	974.256	749.118	248.383	453.021	438.845	245.991	166.835	791.998	78.41	682.613	238.347	277.164	298.964	127.298	108.875	415	271	173.263	214.851	645.476	432.117	607.638	745.097	1047.2	654.216	477.257	541.555	564.902	310.613	323.039	227.231	689.314	499.349	1287.74	406.625	480.261	347.178	717.146	464.572
-1.03896		651.501	954.271	712.621	302.643	487.036	497.189	308.256	201.359	959.498	76.766	824.638	276.255	411.423	340.924	117.637	190.233	443.5	335.5	258.702	215.211	738.4	430.585	649.5	702.666	1313.65	710.737	511.293	577.637	544.744	435.311	440.533	172.22	760.325	433.655	1411.51	448.645	553.072	360.108	818.86	351.324
-0.974026		642.197	1119.18	800.692	372.791	533.142	667.346	358.405	175.814	1309.13	246.677	1020.06	312.984	661.375	365.023	141.082	220.946	594.5	370.5	347.14	290.176	868.926	441.869	547.069	739.708	1424.91	760.661	764.95	735.813	703.191	454.657	668.434	329.442	835.885	472.524	1507.35	543.567	677.294	374.942	965.091	448.622
-0.909091		766.155	1187.97	1106.83	400.525	625.403	817.227	484.929	194.021	1495.72	393.323	1218.11	311.591	1072.11	386.453	230.111	301.363	812.5	424	473.342	360.395	1014.48	536.14	665.444	817.222	1641.36	873.095	999.791	878.962	635.2	526.89	921.021	489.209	992.064	459.79	1855.95	544.86	756.782	495.878	1095.4	551.578
-0.844156		873.892	1244.65	1241.9	489.948	637.252	779.888	582.206	269.231	1802.29	446.295	1495.34	325.109	1539.14	445.698	333.391	311.59	1011	504.5	656.202	395.5	1088.66	500.947	607.569	799.916	2074.57	1024.14	1196.49	1043.5	880.605	569.633	1412.62	517.536	1144.88	598.953	1985.51	708.402	851.618	591.141	1380.48	638.82
-0.779221		1137.17	1293.76	1468.03	551.791	745.713	855.839	740.38	310.078	2243.86	530.333	1687.31	351.464	2074.2	489.213	530.138	377.57	1274.5	613.5	892.456	438.632	1501.08	659.779	722.944	860	2455.59	1110.64	1693.67	1284.29	1023.35	859.537	2111.52	696.813	1572	710.774	2236.44	776.509	1004.88	701.254	1806.99	639.626
-0.714286		1461.29	1345.6	1698.19	641.395	899.287	946.223	904.165	375.678	2722.89	659.847	1927.84	446.436	2728.29	600.093	712.242	458.677	1641.5	747.5	1242.1	548.886	1991.35	792.523	729.569	943.986	2799.98	1251.53	1991.36	1602.71	1407.44	905.798	2850.43	1033.26	2050.84	955.127	2641.39	1046.93	1111.5	916.402	2237.16	747.869
-0.649351		1813.77	1470.17	2049.55	701.083	1247.13	1173.37	1195.87	380.5	3420.39	884.911	2430.95	495.369	3524.36	687.733	1008.23	542.946	2287	906	1740.39	569.158	2417.86	836.294	858.555	1031.83	3280.6	1457.37	2257.6	1963.32	1630.84	1123.8	3706.27	1314.87	2526	1122.12	3404.33	1287.66	1343.49	1132.25	2837.75	821.253
-0.584416		2460	1707.39	2529.8	833.951	1785.54	1259.34	1743.31	416.711	4286.76	1045.14	3113.44	645.985	4292.68	931.922	1393.09	570.676	3073.5	1232	2492.4	606.965	3216.44	1038.98	1065.61	1082.53	3818.42	1688.11	2844.97	2232.96	2167.56	1237.39	4930.78	1979.05	2984.17	1305.43	4298.86	1580.92	1624.13	1412.69	3717.26	1002.46
-0.519481		3183.82	2047.1	3210.16	926.807	2565.84	1824.51	2403.82	547.401	5044.48	1202.35	3788.01	822.45	5117.24	1075.61	2030.76	750.605	3834	1805	3395.58	736.422	3955.12	1215.82	1216.5	1219.89	4343.24	2201.3	3232.81	2650.74	2957.98	1578.58	6206.63	2801.65	3404.31	1493.03	5433.6	1853.79	1906.2	1855.78	4847.56	1367.21
-0.454545		4037.86	2598.18	4038.48	1147.71	3372.59	2553.47	3001.4	669.988	6243.89	1504.46	4758.61	1080.96	6435.8	1559.11	2804.15	931.283	4707	2618.5	4092.6	1079.16	4956.63	1440.29	1598.78	1406.08	5191.2	2996.5	3737.67	3024.94	3585.18	2049.97	7658.56	3755.85	4018.65	2055.57	6761.18	2174.9	2469.8	2518.98	6245.23	2015.57
-0.38961		5152.93	3489.96	5223.43	1357.45	4499.28	3423.62	3936.4	984.69	7384.03	1907.97	6590.74	1569.82	7867.45	2239.99	3720.83	1269.89	5758.5	3766.5	5156.12	1638.44	6198.54	1637.08	2180.44	1755.78	6058.27	4177.39	4216.87	3652.85	4503.94	3076.09	9150.16	4758.13	4952.65	2541.04	8216.94	2822.72	3194.35	3295.96	8092.14	2986.55
-0.324675		6228.91	5156.05	6732.12	1721.44	6030.06	4857.22	5155.98	1260.78	8672.34	2511.17	8668.17	2532.54	9298.89	3555.73	5111.68	1768.96	6863.5	5224.5	6339.72	2747.39	7667.18	2540.07	2939.01	3246.18	6863.99	6085.03	4745.54	5005.81	5834.8	4523.13	10842.2	5833.55	6079.25	3387.24	10021.9	3623.06	4466.33	4724.8	10213.8	4803.17
-0.25974		7507.53	7853.12	8594.06	2647.72	8034.21	7367.3	6760.05	2105.63	10483.9	3699.78	11315	4739.9	10624	5886.74	6960.08	3562.16	8114.5	7013	7829.23	4944.79	8744.31	3918.45	4132.83	6309.33	7889.91	9187.54	5403.99	7192.32	7594.14	6824.86	12820.7	7503.43	7426.59	4614.24	11963.2	5071.96	6095.1	7111.09	12451.5	7841.05
-0.194805		9147.22	11192.4	10653.8	4688.72	10163.3	11258.6	8544.56	3992.14	12812.4	6261.38	14022.7	8278.65	11743.9	8575.48	8980.23	6531.3	9592	9524.5	9655.82	7866.72	10264.7	6450.1	5293.69	11385.1	9155.51	13702.5	6192.44	10370.8	10322.9	9468.27	14829.9	10173.7	8947.93	6706.67	14051.4	7008.43	7678.9	10199.7	14339.1	11616
-0.12987		10381.1	14791.1	13055	7653.71	12472.8	17726	9867.36	7043.44	15396.9	10337.6	16864.9	13097.9	12209.3	11275.1	10968.9	10460.8	11024	12915	11938.6	11425.7	11287.8	9794.35	6523.56	16756.2	10541.6	19211.2	7020.55	13413.3	12898.5	12134.3	16507.1	13708	10584.2	9477.76	16413.2	9422.94	9735.99	13393	15422.3	15658
-0.0649351		11118.9	17312.4	14099	10696.4	14409.8	23895.5	10746.7	10471.1	17109.2	14679.4	19544.6	16942.1	11963.9	13109	12124.2	13576.7	12062.5	16660.5	14238.1	13984.7	12188.8	13228.8	6819.64	20628.2	11381.5	24082.9	7385.57	15163.9	14811.4	14801.2	17603.9	16785	11710.7	12409.3	18009.4	11831.5	11863.2	15960.5	16250.5	18978
0		11142.6	17762.5	14623.2	12194	15686.8	27732.9	11081.7	12940.8	18037.6	17508.9	20006.9	18352.4	10929	13237.3	13114.4	15201.7	12677.5	18839.5	15375.8	14209.8	12346.5	15121.7	7267.61	21820	11576.3	25663.2	7494.75	15660.4	15852.6	17044.6	17828.9	17586	12650.9	12976.5	18130.4	13711.4	13126.7	16773.3	16438.6	20158.4
0.0649351		10864.1	15888.4	14064.9	11748.9	15587.5	26306.6	10260	12839.5	17638.6	17100.7	19056.3	16896.8	9276.4	12248.9	12852.1	15148.5	12539.5	18355.5	14803.9	12077.5	11556.3	14731.3	6992.6	19662	11215.4	23158.3	7344.24	15001.5	15437	16727.8	17128.3	15859.2	12521.2	11470.3	17165.6	13339.3	13079.4	15742.1	15110.3	18137.7
0.12987		9509.94	12288.7	12277.9	10183	13932	21244.9	8811.78	10527.9	16269.5	13828.3	16508.1	13049.9	7368.12	10405.7	11824.3	13393.4	11609	15811.5	12959	8654.82	10004.6	11625.8	6329.78	16867.5	10051.7	17853.2	7045.35	13069.3	14018.5	14248.8	15475.3	12505.1	11475	8681.14	15209.8	10933.2	12118.5	12975.4	12940.1	13903.8
0.194805		7597.59	7838.24	10694.8	8808.71	11972.2	14168.8	7017.59	7071.77	14233.6	10209.3	13548	8218.5	5772.92	7617.55	10387.2	10341.3	10171	12274.5	10472.5	5168.34	8308.81	8243.12	5438.24	12412.1	8331.01	11636.2	6662.06	10531.2	12034.2	10201.8	13493.9	9023.31	9721.5	5693.9	12447.8	7909.43	10704.7	9748.45	10668.8	9212.21
0.25974		5985.61	4379.77	8581.02	7254.02	9840.17	8830.44	5415.87	4120.28	12001.9	7041.92	10810.4	4327.75	4321	4826.4	8757.21	7064.43	8441	8968.5	8356.82	3030.5	6594.04	5178.77	4412.28	8797.56	6255.57	6685.51	5736.3	7857.07	9943.4	6379.83	11624.9	6690.21	7761.22	3620.19	9934.22	5050.11	9002.81	7290.48	8208.74	5414.36
0.324675		4640.93	2293.33	6444.88	5452.23	7875.38	5237.76	4034.94	2343.18	9548.01	4670.34	8428.23	2192.21	3212.45	2684.36	7124.18	4375.73	7041.5	6132.5	6630.02	2124.24	4911.23	3140.53	3384.12	5834.25	4579.09	3774.46	4558.84	5310.04	8098.18	3935.17	10000.2	5054.01	6344.22	2122.67	7535.3	3252.97	7081.37	5272.79	6301.86	3158.5
0.38961		3360.4	1404.07	4556	3746.17	6199.95	3324.52	2869.49	1551.62	7517.64	2923.88	6249.71	1321.87	2521.05	1447	5746.29	2599.42	6047.5	3941.5	5060.14	1679.55	3558.36	2082.73	2576.44	3840.67	3253.92	2455.86	3667.17	3434.54	6731.81	2413.85	8087.9	3904.5	5106.62	1538.17	5337.26	2376.09	5136.52	3749.78	5047.65	2036.17
0.454545		2465	1232.78	3472.84	2142.2	4722.81	2080.05	2107.63	1193.8	5757.93	2072.87	4419.25	948.886	1946.28	918.373	4643.12	1625.9	5021	2615	4058.72	1287.67	2696.38	1498.1	2090.82	2869.74	2263.34	1648.7	3127.92	2320.24	5374.6	1497.63	6084.09	2958.33	3875.73	1098.62	3661.72	1629.88	3782.79	2685.1	3971.48	1572.12
0.519481		1747.16	964.586	2527.92	1392.34	3662.31	1408.83	1370.74	1036.09	4446.49	1475.97	3029.48	690.576	1477.66	625.752	3723.02	1340.01	4116.5	1874	3235.49	926.316	2015.36	963.044	1586.67	1971.33	1650.13	1263.14	2479.61	1820.51	4299.12	1107.82	4645.41	2158.48	3038.64	838.345	2447.56	1151.01	2687.03	1940.65	3019.27	1224.56
0.584416		1212.12	808.842	1828.78	1001.6	2747.17	1058.2	1059.97	775.198	3432.72	1203.64	1984.4	612.951	1222.2	447.422	3045.62	1222.76	3492	1414	2605.32	830.185	1590.32	641.706	1184.19	1487.36	1188.35	985.185	1992.96	1351.13	3345.49	852.892	3193.6	1802.32	2306.74	653.905	1530.72	887.466	1979.77	1569.45	2191.19	806.955
0.649351		906.087	653.263	1253.52	718.005	2118.31	842.266	732.111	678.806	2546.04	993.092	1303.08	426.746	1050.1	325.973	2706.18	1098.47	2774.5	1254.5	2123.9	818.632	1105.5	502.754	982.444	996.833	844.097	755.791	1650.96	1036.8	2497.3	640.78	2323.25	1447.13	1681.84	484.572	950.215	636.457	1364.23	1179.85	1511.29	701.622
0.714286		749.067	493.346	825.153	510.443	1527.29	719.624	526.165	546.984	1843.07	807.554	930.311	379.17	928.582	290.799	2395.13	1071.63	2261.5	1160	1800.73	743.895	692.723	412.33	762.18	794.166	602.861	588.577	1475.91	861.626	1829.1	540.535	1825.24	1220.56	1325.6	414.524	566.136	431.069	798.972	732.024	1180.94	635.349
0.779221		523.903	447.186	587.855	416.525	1084.25	623.663	578.058	390.5	1270.7	752.581	595.664	360.682	833.615	211.93	1924.43	1007.09	1843.5	956	1521.57	660.632	549.871	291.521	689.444	641.111	437.239	457.542	1234.49	770.625	1256.02	451.969	1341.31	915.332	963.694	274.131	373.773	346.02	402.686	549.258	839.704	545.431
0.844156		488.682	397.87	352.492	406.095	825.412	606.011	423.934	330.351	958.101	722.711	384.902	249.158	766.803	225.186	1633.17	1006.47	1434	802	1252.95	570.413	410.193	163.92	481.43	503.833	370.312	344.29	1009.11	619.188	888.522	384.981	1098.33	967.931	656.441	230.54	176.481	244.777	236.883	419.035	510.58	454.972
0.909091		407.349	300.506	278.261	335.394	648.535	463.342	376.417	268.037	725.6	726.385	294.374	204.39	634.195	175.706	1502.51	1036.09	1160	769	955.833	530.711	243.086	234.166	390.444	336.666	295.209	301.055	942.939	473.945	667.563	383.377	986.329	777.63	555.825	238.929	144.924	194.713	157.717	266.242	526.606	527.248
0.974026		309.075	245.89	248.423	234.206	469.284	419.801	255.289	185.368	499.66	595.089	306.479	116.052	610.042	173.461	1359.49	1006.91	823.5	743.5	774.5	476.869	226.498	155.264	259.319	316.375	196.25	242.578	773.138	456.436	425.933	320.301	842.691	746.577	386.504	134.238	116.245	82.429	98.229	229.166	418.889	422.24
1.03896		209.33	205.059	179.082	177.182	425.323	290.493	290.566	109.624	428.994	546.817	206.792	100.416	569.113	133.453	1218.87	964.015	607	723	634.728	463.825	274.595	75.156	225.111	229.333	162.84	195.834	638.385	296.97	257.79	248.972	809.499	755.872	250.98	123.131	103.44	109.976	90.668	118.251	276.947	314.223
1.1039		198.172	184.483	108.732	121.943	265.282	283.446	268.149	111.789	292.696	439.552	162.524	87.416	567.188	102.406	1149.22	958.358	495.5	690.5	583.833	451	194.434	93.961	214.166	199.458	110.369	185.974	631.847	273.981	204.43	157.816	662.593	693.674	220.837	149.905	76.591	70.836	82.203	72.523	196.593	285.486
1.16883		207.016	98.981	40.115	43.353	178.979	287.049	219.169	86.74	235.388	400.512	85.659	27.108	529.237	135.541	1147.21	873.506	420	641	511.5	425.43	123.432	125.431	181.444	197.889	66.614	122.718	521.996	315.715	99.472	127.777	664.812	659.112	121.587	60.941	68.754	80.527	53.408	79.062	92.597	173.12
1.23377		192.477	116.965	112.431	60.19	221.45	197.936	149.653	93.831	250.759	430.288	0	44.735	542.103	102.369	1106.64	912.753	349.5	628	411.64	406.5	58.671	101.435	134.291	125.486	81.672	51.468	477.358	330.274	66.707	132.104	660.566	634.61	98.996	90.873	59.147	105.157	22.526	67.293	65.73	99.166
1.2987		32.208	111.456	23.713	93.804	176.853	131.584	133.566	102.26	136.5	409.564	25.538	34.336	552.56	69.776	1058.87	890.738	328.5	628.5	373.86	338.132	81.982	72.516	156.666	67.666	61.578	49.127	414.909	317.994	29.641	54.973	627.391	610.196	28.159	52.56	14.645	62.934	0	28.522	92.375	164.573
1.36364		0	30.814	0	42.88	62.754	117.527	88.752	48.938	120.864	366.663	56.42	29.072	511.508	113.638	1025.36	883.626	394.5	587.5	378.632	327.974	54.806	94.231	89.152	73.75	70.468	102.254	466.885	177.208	11.932	35.4	594.968	612.251	32.837	44.095	11.069	3.675	4.981	0	22.335	164.693
1.42857		8.753	0	51.266	33.648	42.293	75.747	15.665	15.715	100.287	361.383	40.486	19.591	475.039	0	1088.67	934.319	347.5	518.5	394.289	265.246	33.368	0	84.777	0	65.524	73.008	436.673	152.403	12.969	10.395	494.464	656.992	0	61.024	12.891	21.457	19.767	23.075	0	78.283
1.49351		18.207	0.196	62.123	0	0	0	0	0	44.433	388.018	18.855	0	366.906	22.904	1009.5	942.628	284	494	297.728	223.632	0	50.659	0	93.125	0	0	465.778	154.149	0	0	514.561	609.446	2.98	0	0	0	26.061	0.426	3.842	0

## Sheet: 35 nM holo(H-N19A)
Figure 2-source data 2
Figure 2C
Non-normalized values
	35 nM holo(H-N19A)_150 min
Chromosome sample		1		2		3		4		5		6		7		8		9		10		11		12		13		14		15		16		17		18		19		20
		DAPI	mSMC4	DAPI	mSMC4	DAPI	mSMC4	DAPI	mSMC4	DAPI	mSMC4	DAPI	mSMC4	DAPI	mSMC4	DAPI	mSMC4	DAPI	mSMC4	DAPI	mSMC4	DAPI	mSMC4	DAPI	mSMC4	DAPI	mSMC4	DAPI	mSMC4	DAPI	mSMC4	DAPI	mSMC4	DAPI	mSMC4	DAPI	mSMC4	DAPI	mSMC4	DAPI	mSMC4
Distance (µm)
-1.49351		0	0	1639.26	243.971	932.686	28.105	0	0	715.895	45.503	530.665	0	0	41.62	434.284	0	340.272	53.477	0	6.615	0	0	0	75.632	1100.9	0	285.982	51.906	1648.68	64.701	179.233	102.878	730.915	55.654	1520.28	79.578	0	57.41	0	18.937
-1.42857		108.028	25.223	2076.87	242.617	1086.71	18.818	134.445	14.268	1098.76	57.455	746.487	34.753	78.315	50.268	783.795	71.092	594.917	102.615	248.915	0	111.5	19	253.735	63.439	1431.06	96.449	528.988	29.598	1949.59	19.532	467.561	62.749	1060.77	55.431	1915.81	86.482	322.808	43.228	374.826	39.017
-1.36364		381.639	91.806	2375.51	248.218	1286.89	65.218	294.123	82.858	1538.42	68.778	921.189	12.36	378.934	0	1153.24	128.376	965.822	92.523	447.401	20.851	330	28	507.982	34.51	1755.55	100.567	624.751	80.095	2275.83	64.776	736.087	91.457	1380.69	51.106	2186.76	48.533	662.429	0	710.48	0
-1.2987		622.903	45.473	2649.48	225.966	1459.87	59.8	314.011	2.493	1897.45	98.608	1037.93	11.665	733.004	36.084	1375.45	72.468	1050.55	128.06	610.959	15.836	609	13	620.624	0	2010.41	34.216	969.958	35.219	2650.34	69.828	1099.36	99.75	1878.1	31.478	2480.46	30.262	1125.37	98.747	1076.95	49.008
-1.23377		943.778	95.389	3089.65	239.572	1697.1	55.518	693.355	82.804	2421.48	64.767	1285.49	40.497	1062.69	46.198	1697.12	137.793	1298.18	130.104	895.276	63.499	1020.5	71.5	737.25	44.122	2241.63	49.07	1343.73	48.586	3115.02	145.495	1381	125.597	2260.5	0	2754.97	131.864	1492.67	109.947	1393.54	182.408
-1.16883		1252.64	71.098	3620.36	202.113	2016.41	37.673	949.736	30.433	2780.38	29.367	1535.26	49.264	1377.53	25.774	2124.48	124.883	1503.68	55.238	1193.29	70.16	1435	53.5	994.115	92.371	2589.56	153.496	1681.92	74.799	3640.35	141.878	1716.36	167.832	2470.17	1.88	3188.2	199.301	1761.61	174.425	1854.04	171.958
-1.1039		1563.11	147.362	4137.35	282.384	2261.39	61.341	1121.89	62.487	3223.68	120.79	1638.63	94.184	1792.45	29.622	2207.69	117.137	1862.89	207.813	1504.68	165.825	1678.5	4.5	1253.55	102.629	3112.15	102.713	2069.76	93.574	3981.07	133.403	2195.17	155.104	2872.59	18.063	3562.21	177.558	2080.36	214.375	2268.59	113.633
-1.03896		2145.21	193.167	4589.75	375.181	2536.16	83.036	1335.2	137.018	4014.5	112.534	1907.67	126.644	2198.23	54.773	2603.92	145.951	2225.94	205.32	1971.68	41.368	2078	60	1511.92	83.874	3466.33	125.488	2481.81	133.148	4487.79	113.627	2773	166.754	3229.67	110.49	3736.23	212.086	2206.16	177.605	2663.49	146.254
-0.974026		2477.56	186.556	5068.04	379.093	2768.86	74.75	1627.14	80.532	4421.78	98.135	2166.23	138.085	2733.61	64.571	2809.87	164.789	2396.99	257.387	2211.83	205.188	2624	107.5	1878.69	99.929	3955.31	200.2	3040.44	174.693	4961.44	155.963	3310.03	232.249	3611.82	88.414	4097.83	239.276	2565.63	299.077	3141.26	152.101
-0.909091		2847.96	220.612	5660.77	451.24	3178.8	101.564	1936.47	93.147	5170.47	95.786	2383.89	159.485	3165.82	95.977	3193.33	228.601	2556.67	226.247	2374.42	275.428	3070	35	2075.12	129.971	4314.04	221.478	3650.43	193.746	5451.84	167.336	3788.89	207.341	4095.37	28.39	4306.85	241.365	3135.2	247.953	3350.43	255.562
-0.844156		3288.81	295.639	6553.92	497.885	3466.91	157.705	2324.92	58.881	5655.18	147.384	2594.28	174.596	3733.6	113.657	3621.97	293.751	3042.82	219.909	2801.74	234.693	3543	10.5	2421.83	218.938	5048.38	357.909	4090.61	219.521	6061.56	216.474	4327.63	263.23	4656.12	88.197	4590.03	266.976	3672.01	326.439	3591.95	135.285
-0.779221		3845.89	372.181	7318.23	547.192	4036.74	109.691	2747.71	96.369	6283.39	229.038	2756.55	238.488	4153.61	146.222	4113.8	289.224	3350.63	280.86	3350.48	288.397	3991	101.5	2841.31	272.377	5715.87	439.857	4914.53	270.385	6853.68	271.902	5038.34	277.377	5400.84	120.96	5111.13	294.34	4011.9	419.009	4163.31	282.686
-0.714286		4400.56	595.5	8307.34	639.226	4429.36	92.195	3196.65	140.994	6962.28	284.118	3024.16	278.938	4848.08	160.071	4598.06	520.557	3700.8	344.585	3882.93	349.855	4661.5	149	3151.19	295.697	6410.26	627.98	5503.87	410.048	7909.03	317.872	5443.51	146.979	6092.52	171.37	5688.45	323.067	4516.3	451.995	4683.22	387.158
-0.649351		5010.99	829.237	9382.9	727.411	4777.05	166.309	3531.52	141.555	7667.16	252.232	3535.21	317.891	5711.68	216.252	5297.98	790.058	4136.31	431.23	4618.91	409.637	5395	157	3330.2	381.595	7069.49	786.446	6233.52	455.326	9307.47	371.952	5681.95	441.202	6827.26	134.95	6395.25	360.631	5084.01	480.334	5369.7	621.679
-0.584416		5537.47	1076.97	10267.4	818.723	5321.73	221.723	4020.52	185.148	8371.93	300.615	3963.21	378.916	6745.45	250.65	6120.37	1302.6	4407.24	553.678	5234.24	442.89	6061.5	186.5	3617.18	441.372	7798.35	1079.84	6842.01	675.125	10585	460.78	5914.42	543.436	7757.18	108.175	7433.63	394.274	6013.79	575.357	6002.72	835.934
-0.519481		5972.42	1299.61	11250.5	1079.5	6052.05	264.582	4499.96	270.731	9528.91	421.827	4331.03	475.826	7900.49	258.732	6911.39	2013.25	4865.29	746.725	5915.81	519.601	7068.5	311	3941.13	630.565	8511.18	1352.54	8071.24	972.503	11556.5	567.363	6236.34	723.015	8867.88	249.11	8228.46	542.274	7204.78	795.158	6679.49	1051.72
-0.454545		6726.83	1637.61	11612.7	1510.28	6464.82	374.232	5375.21	270.743	10973.5	462.768	4708.44	742.343	9544.29	312.334	7604.89	2743.67	5620.16	1065.47	6564.37	477.792	8247.5	457	4297.68	989.036	9000.27	1624.08	9458.29	1603.2	12067.4	970.667	6950.38	1228.12	10363.3	364.405	8894.9	686.948	8087.72	998.346	7476.19	1578.25
-0.38961		7445.64	2099.56	12133	2189.69	6826.14	752.054	6131.91	314.559	11769.1	572.652	5274.89	1113.25	10460.6	513.78	8210.98	3320.72	6332.85	1465.12	7402.95	591.556	9484.5	625.5	4827.84	1486.75	9528.76	1920.38	10956.8	2528.85	12310.9	1564.68	7161.18	1880.18	11963.3	486.045	9537.79	884.105	8817.1	1179.8	8300.02	2393.68
-0.324675		8031.22	2593.03	12479.7	3256.23	7495.35	1060.78	6811.14	381.879	12917.9	790.335	5877.08	1618.86	11208.8	1047.39	8651.73	3794.29	6956.97	2324.92	8569.98	791.647	10410	944	5484.41	2244.94	9892.62	2450.66	12305	3728.09	12650.9	2741.82	8058.05	2704.66	13165.3	731.499	10423	1179.22	9607.34	1550.16	9054.72	3119.95
-0.25974		8648.83	3246.99	12890.3	4306.81	8037.01	1365.2	7437.96	539.022	13481.5	1492.64	6272.95	2211.52	11917.7	2040.24	9254.04	4383	7246.43	3332.61	9816.36	937.811	11057	1433	6192.46	3097.78	9993.9	3281.76	13364.7	5116.88	13450.3	4370.77	9249.08	3269.71	13954.7	1297.68	11100.4	1746.42	10216.3	2254.08	9956.57	3559.45
-0.194805		9289.89	4189.06	13019.7	5429.6	8572.48	1770.08	8023.6	671.091	14081	2672.72	6617.53	2697.76	12256.7	3984.35	9613.19	5281.74	7595.79	4652.54	10916.8	1119.47	11354.5	2109.5	6973.06	4091.37	10201.3	4793.32	14548.6	7179.81	13826.4	5835.69	10272.4	4020.76	14708.3	2257.94	12258.6	2930.04	10696.8	3592.58	10497.2	4016.84
-0.12987		10157.2	6434.68	12999.6	6674.98	8804.21	2249.55	8477.56	924.379	14845.3	3966.5	6791.53	3174.26	12637.8	6916.95	9883.38	6681.26	7833.85	5753.86	11930.9	1407.37	11380	2874	7476.55	4939.12	10355.3	7028.22	15361	10005.2	14543.8	6990.31	11398.9	5255.28	15538.1	3580.72	13523.8	4337.84	11143.2	5502.1	11113.1	4376.55
-0.0649351		11259.1	8615.58	12998.3	8377.84	8931.73	2710.64	8616.25	1007.86	15431.2	4793.23	6956.21	3616.02	13255.6	10021.5	10274.7	8154.52	8114.58	6576.45	12475.5	1637.77	11621.5	3693.5	7671.18	5674.64	10304.2	9609.59	15425.9	12293.2	15150.8	7523.93	12020.2	6330.66	16356.7	4796.41	14294.2	6095.95	11852.5	6936.42	11430.7	5011.33
0		12224.8	10238.9	13060.3	9054.87	8959.76	3054.2	8834.04	1143.13	15457.2	4809.09	7045.46	3810.89	13526.7	12554.3	10395.7	8948	8293.13	7156.27	12557.8	1641.53	11662	4163	7960.69	5990.82	9965.82	10646.5	15495.2	14102.5	15347.9	7899.39	12342.6	6791.84	16971.1	5261.57	14611.9	7531.68	11880.3	7718.74	11765.7	5044.01
0.0649351		12217.8	10097.9	12886.9	8721.25	8802.58	3018.97	8555.35	1030.72	15032.6	4369.11	6823.6	3462.67	13360.3	11913.5	10291.8	8810.67	8132.63	6829.77	12170.4	1559.14	11516	3916.5	7858.49	5537.05	9295.25	10453.3	14760.5	12910.2	15185.3	7487.95	11700.3	6036.61	16571.4	5183.77	14503.2	7436.66	11324.1	6741.46	11640.2	4749.79
0.12987		11542.9	8700.32	12435.6	7944.16	8589.96	2391.8	8138.39	972.151	14179.5	3902.39	6647.17	2482.53	12700.1	9970.18	9955.63	7663.57	7893	5502.72	11616.7	1410.81	11367.5	2977.5	7882.69	4682.41	8511.05	8773.1	13877.6	10537.1	14391.2	6400.64	10656.8	4133.23	15476.4	4790.77	13809.8	6310.35	10515.1	5199.27	11038.4	3668.47
0.194805		10585.9	6549.22	11057.7	6480.95	8168.4	1772.87	7781.38	818.417	13368.9	3273.02	6438.27	1483.25	12273.3	6937.19	9617.47	5856.38	7880.41	4096.84	11076.3	1297.71	11389.5	1884	7613.96	3570.88	7794.16	6453.25	13030.3	8221.04	13269.1	5136.35	9901.75	2190.28	14238.9	4394.06	12699.5	4574.07	10500.8	3764.02	10463	2968.4
0.25974		9677.74	4728.82	10196.4	5018.21	7429.27	1161.47	7249.64	629.155	12591.2	2323.56	6128.38	745.923	11783.5	4360.04	9388.01	4369.9	7552.29	2848.45	10749.5	1191.6	11051	1206	7249.38	2453.05	6396.59	4097.32	11878.2	6353.59	11943.1	3688.7	8830.48	953.303	12759	4045.95	11354	2971.4	10065.7	2676.55	10181.8	2324.81
0.324675		8684.89	3250.39	9712.1	3624.64	6614.65	748.341	6679.07	548.95	11679.1	1400.3	5444.09	444.834	11115.6	2713.11	8908.41	3281.01	6973.82	2415.11	10323.4	1204.04	10426.5	858	6631.21	1839.44	5318.64	2345.84	10820.5	4642.68	11394	2856.13	7654.82	640.292	11299.2	3386.34	9949.43	1958.4	9393.47	2127.62	9224.56	1727.34
0.38961		7828.01	2429.18	8990.64	2514.91	5876.2	558.018	6241.04	393.069	10803.6	796.808	4744.09	333.294	10502	1994.57	8077.75	2368.66	6105.17	1963.23	9320.44	1060.31	9934	655	6250.9	1466.76	4619.77	1345.87	9790.05	3212.55	10493.9	2063.95	6702	435.916	9897.79	2582.88	8379.74	1360.53	8805.11	1537.01	8415.11	1313.59
0.454545		6900.58	1921.11	8232.6	1836.78	4976.78	445.4	5731.89	365.142	9462.96	480.606	4181.46	300.973	9769.49	1539.44	7119.75	1787.28	5209.66	1648.27	8890.5	935.008	9540.5	467.5	6255.69	1191.16	3908.41	919.926	8656.22	2161.49	9845.43	1446.25	5851.58	361.187	8507.99	1899.1	7025.56	1068.68	8412.46	1176.28	7455.26	1052.32
0.519481		6036.53	1564.24	7478.31	1469.74	4218.32	393.855	4914.21	308.895	8137.24	371.165	3721.91	298.164	8809.01	1264.46	6183.84	1295.72	4513.63	1170.69	8079.12	790.549	8923	338	6006.04	868.681	3388.18	693.6	7324.02	1486.62	9173.85	997.667	4976.24	300.109	7181.61	1406.75	6114.4	840.984	7776.83	949.302	6709.14	667.662
0.584416		5371.06	1227.72	6627.48	1158.44	3686.9	313.346	4389.86	252.851	7027.71	327.164	3443.83	238.232	7856.25	1011.18	5300.03	947.84	3897.38	765.808	7530.33	757.592	8205	252	5569.68	584.096	2957.55	547.234	6263.67	1303.33	8011.57	770.359	4384.26	235.205	5794.71	1065.87	5512.29	615.174	7550.86	729.825	5847.02	522.868
0.649351		4830.42	966.056	5891.37	841.335	3052.2	276.309	4001.41	211.888	5986.09	250.724	3099.3	198.448	6535.8	809.284	4676.55	750.51	3425.79	492.072	7055.85	648.512	7647.5	249	5023.77	419.881	2535.84	446.914	5505.78	1058.25	7137.07	620.245	4067.17	174.297	4729.77	781.823	4823.08	439.049	7144.54	689.704	4975.9	500.671
0.714286		4272.58	789.723	5341.73	640.151	2680.76	247.427	3664.86	222.912	5116.36	136.777	2799.94	170.666	5534.44	581.271	4159.89	619.379	2924.43	394.523	6921	644.598	7070	228.5	4857.22	333.684	2225.79	277.024	4646.9	835.841	6328.45	453.311	3409.14	155.709	3863.32	625.704	4196.19	340.167	7076.51	648.1	4014.95	409.665
0.779221		3838.31	665.348	4814.09	560.685	2467.23	198.364	3199.98	203.299	4335.16	64.777	2383.88	124.975	4737.85	484.653	3743.86	467.887	2648.16	371.932	6600.9	515.731	6679	150.5	4837.35	326.576	1887.06	274.69	4126.08	610.663	5657.12	362.405	3193.41	159.833	3217.74	498.984	3705.28	301.819	6327.12	491.54	3617.76	289.825
0.844156		3544.44	509.945	4184.76	390.758	1979.97	171.627	2868.42	169.667	3660.58	133.265	2167.91	105.907	4129.69	431.833	3475.12	421.549	2405.23	282.186	6230.58	509.528	6215.5	120.5	4527.79	304.918	1663.03	253.672	3662.27	560.521	4848.38	258.022	2933.85	134.265	2719	359.659	3145.18	281.254	6114.1	412.433	3098.17	272.133
0.909091		3085.49	430.667	3605.82	364.61	1712.45	112.218	2482.86	139.077	3039.64	120.628	1803.72	63.516	3634.39	441.222	2867.04	350.05	2075.47	218.284	6148.34	455.689	5771.5	153	4250.3	340.195	1259.22	187.913	3338.53	439.752	4250.51	163.987	2425.21	133.334	2331.23	281.701	2656.02	257.321	5759.31	381.945	2789.62	290.966
0.974026		2666.14	312.806	3097.66	324.168	1392.81	80.255	2099.14	117.044	2478.61	93.288	1499.1	43.403	3174.33	336.718	2537.89	309.142	1753.49	191.398	5497.37	522.077	5192.5	175.5	3957.81	259.662	1035.91	181.56	2631.44	362.675	3392.09	137.515	2049.11	180.825	1988.95	203.715	2155.22	228.713	5214.35	359.357	2440.3	268.451
1.03896		2278.57	260.125	2583.43	240.062	1243.58	104.655	1683.32	112.672	1955.94	78.753	1379.8	109.638	2906.42	301.889	2235.79	244.051	1416.56	218.895	5244.42	403.472	4659.5	169	3877.85	196.096	748.956	164.239	2149	211.326	2852.27	135.221	1690.02	154.768	1867.55	176.438	1996.42	179.992	4901.87	381.533	1808.04	185.347
1.1039		2016.72	242.889	2162.35	209.474	1057.64	87.564	1415.7	110.116	1656.84	47.859	1146.62	75.209	2503.4	188.251	1912.64	190.406	1253.41	172.995	4919.92	325.101	4380	152.5	3545.92	147.888	583.544	189.606	1772.4	121.994	2367	138.18	1350.66	108.733	1640.62	183.569	1644.45	183.866	4626.81	402.995	1574.51	160.258
1.16883		1614.68	212.473	1797.71	187.869	965.541	87.4	1165.25	115.997	1398.73	41.249	921.154	49.202	2213.1	174.8	1505.98	165.908	936.813	80.919	4461.91	373.453	3924	39.5	3303.53	132.931	551.543	163.237	1316.16	92.811	2203.9	67.16	1149.43	94.475	1301.78	169.617	1410.97	98.522	4156.96	357.967	1439.74	27.892
1.23377		1289.92	194.445	1510.26	138.997	778.35	107.95	948.744	23.164	1000.45	42.315	684.749	54.531	2038.2	180.906	1026.46	139.815	677.186	63.602	4301.77	391.045	3364	24.5	2934.29	112.998	375.169	176.22	952.893	78.012	1777.87	73.755	931.066	117.744	1037.17	120.493	967.065	112.8	3548.65	358.635	1233.79	86.455
1.2987		1064.74	131.903	1056.02	98.006	537.214	42.309	907.731	27.647	773.464	65.564	520.939	70.217	1727.52	120.371	779.542	159.928	443.3	16.459	4011.93	346.809	2911.5	52.5	2647.08	128.229	290.703	128.849	636.905	42.752	1379.39	40.939	698.462	109.548	826.149	82.182	608.858	79.318	3088.09	452.876	1045.65	83.409
1.36364		830.556	93.389	774.847	110.269	334.727	18.655	610.328	19.697	436.142	0	283.477	62.202	1273.92	52.115	418.848	187.992	250.894	33.636	3395.36	351.828	2351.5	3.5	2491.58	153.18	85.123	109.128	460.071	0	849.87	1.647	461.815	55.705	531.213	58.025	352.188	84.969	2632.82	571.093	905.17	160.771
1.42857		552.333	112.695	369.614	70.506	140.959	0	352.826	42.257	380.956	76.841	144.744	43.551	900.047	148.333	146.654	71.631	62.79	1.568	2922.15	371.051	1815.5	3	2349.42	117.794	25.825	91.586	119.1	14.414	338.279	17.016	231.65	0	229.978	30.809	159.357	0	2255.09	513.314	773.487	141.276
1.49351		352.722	108.056	0	0	0	22.682	72.082	36.432	0	33.724	0	5.269	544.475	25.806	0	28.934	0	0	2686.73	337.472	1539	34	1951.68	160.391	0	45.548	0	51.734	0	0	0	106.411	0	17.603	0	32.565	1976.66	471.852	592.947	224.126
