# Supplementary material for: Cell cycle-specific loading of condensin I is regulated by the N-terminal tail of its kleisin subunit
Source: eLife. 2022 Dec 13;11:e84694. doi: 10.7554/eLife.84694 (PMC9797191; doi:10.7554/eLife.84694)
Supplement: Figure 2—source data 3. [file elife-84694-fig2-data3.xlsx]

## Sheet: Figure 2E
Figure 2-source data 3
Figure 2E
Raw DAPI area and mSMC4 intensity values
		35 nM holo(WT)_30 min					35 nM holo(WT)_150 min
		DAPI (overall)	mSMC4 (overall)				DAPI (overall)	mSMC4 (overall)
Chromosome cluster					Chromosome cluster
1		114132	522102615		1		82690	261979964
2		102414	538567329		2		102780	452469947
3		103142	461450851		3		109235	507897517
4		109875	343205300		4		106302	605591535
5		88649	363769275		5		98971	464436965
6		103897	455398194		6		98756	637694451
7		100336	310792796		7		97915	599581222
8		96222	416162251		8		104574	415493132
9		88258	337775813		9		91634	574582551
10		110382	349480777		10		122173	358506885
		35 nM holo(H-dN)_30 min					35 nM holo(H-dN)_150 min
		DAPI (overall)	mSMC4 (overall)				DAPI (overall)	mSMC4 (overall)
Chromosome cluster					Chromosome cluster
1		81104	664191751		1		64396	703211762
2		80529	840213456		2		96801	894321515
3		87656	773525935		3		74081	839189388
4		69709	764538129		4		79724	1099731004
5		78489	666267917		5		87757	915167109
6		83362	774969308		6		104886	801277082
7		85935	560674953		7		85814	796268606
8		87386	812873111		8		95547	838691491
9		78943	848506318		9		98826	899176015
10		81093	825203134		10		120273	1021511222
		35 nM holo(H-N19D)_30 min					35 nM holo(H-N19D)_150 min
		DAPI (overall)	mSMC4 (overall)				DAPI (overall)	mSMC4 (overall)
Chromosome cluster					Chromosome cluster
1		96309	854877728		1		96206	860286054
2		86682	759727912		2		82367	831996985
3		102597	749183756		3		116489	721809960
4		103080	854171403		4		116082	1122398474
5		94173	750310064		5		97190	949761571
6		90060	749613267		6		93557	693922102
7		93218	704437108		7		84158	635175413
8		90164	792971444		8		105137	876653560
9		87092	771036305		9		87938	1042316413
10		82112	626979094		10		83973	768820574
