# Supplementary material for: Cell cycle-specific loading of condensin I is regulated by the N-terminal tail of its kleisin subunit
Source: eLife. 2022 Dec 13;11:e84694. doi: 10.7554/eLife.84694 (PMC9797191; doi:10.7554/eLife.84694)
Supplement: Figure 2—source data 4. [file elife-84694-fig2-data4.xlsx]

## Sheet: 35nM holo(WT)
Figure 2-source data 4
Figure 2F
Non-normalized values
	35 nM holo(WT)_150 min
Chromosome sample		1		2		3		4		5		6		7		8		9		10		11		12		13		14		15		16		17		18		19		20
		DAPI	mSMC4	DAPI	mSMC4	DAPI	mSMC4	DAPI	mSMC4	DAPI	mSMC4	DAPI	mSMC4	DAPI	mSMC4	DAPI	mSMC4	DAPI	mSMC4	DAPI	mSMC4	DAPI	mSMC4	DAPI	mSMC4	DAPI	mSMC4	DAPI	mSMC4	DAPI	mSMC4	DAPI	mSMC4	DAPI	mSMC4	DAPI	mSMC4	DAPI	mSMC4	DAPI	mSMC4
Distance (µm)
-1.49351		0	20.862	113.633	27.701	190.803	126.558	483.233	152.256	64.785	87.714	71.773	18.316	0	0	420.932	118.898	0	0	0	35.437	864.775	522.188	0	25.248	1918.62	681.054	240.747	65.516	2776.1	1126.64	246.468	64.992	1062.04	804.671	0	43.704	0	52.538	404.007	144.153
-1.42857		27.323	0	118.689	45.639	184.346	50.918	403.16	189.875	53.88	111.765	77.436	43.504	147.631	138.137	504	134.488	61.674	22.153	115.099	0	756.236	374.13	109.881	0	1738.75	647.712	343.392	134.239	2580.65	1068.62	321.486	171.625	1014.61	773.524	34.704	0	35.164	128.974	414.684	82.038
-1.36364		59.644	131.012	74.852	57.991	147.077	0	488.422	160.184	0	0	81.326	51.626	120.12	131.184	531.996	74.197	163.657	83.36	183.145	51.725	668.152	338.805	205.189	96.648	1610.14	677.233	265.262	130.5	2520.14	994.248	420.713	158.736	924.99	835.437	76.934	81.389	83.578	80.52	511.421	94.089
-1.2987		165.963	13.939	186.689	22.284	223.418	94.136	540.67	159.486	100.943	85.791	96.245	80.294	96.314	184.889	738.297	112.529	172.195	28.445	238.075	103.22	682.953	350.837	246.596	117.14	1482.23	584.164	372.779	206.458	2397.68	997.211	441.31	226.825	984.277	790.578	166.643	201.105	118.174	76.164	518.191	156.369
-1.23377		230.543	56.411	240.952	57.985	304.699	132.814	603.081	141.682	172.581	119.539	141.035	79.92	94.766	140.007	853.624	161.007	171.92	111.273	332.622	200.19	708.024	366.678	494.664	109.397	1312.29	512.011	378.7	227.294	2389.61	932.734	502.503	202.716	1005.24	817.364	343.331	329.232	176.028	122.365	579.768	162.343
-1.16883		304.862	77.072	289.363	77.361	280.371	143.432	565.258	150.91	199.251	139.508	180.696	51.346	226.471	114.62	906.862	155.169	331.488	79.263	417.179	194.26	884.583	349.745	658.721	130.133	1248.95	544.631	417.192	261.664	2223.47	986.2	608.534	220.217	909.055	817.903	459.822	251.082	113.629	92.629	645.82	179.004
-1.1039		442.371	2.827	345.958	76.997	430.159	154.397	583.855	170.569	233.31	112.316	363.672	16.963	188.587	230.116	1000.47	205.211	477.246	132.469	487.963	199.905	929.281	323.056	855.433	280.057	1171.5	584.285	475.273	335.163	2270.96	1006.23	691.574	202.794	964.152	837.914	484.116	348.421	134.402	119.333	789.009	218.28
-1.03896		560.675	73.93	442.393	107.796	470.558	120.038	614.731	229.509	325.548	130.466	467.351	64.942	313.378	197.762	1206.74	244.463	385.92	82.192	524.104	273.594	1048.16	444.43	1195.19	277.969	1176.3	606.427	604.611	327.958	2316.42	981.342	785.027	242.404	984.573	879.327	697.709	504.559	203.5	142.45	925.552	326.573
-0.974026		788.994	71.241	558.828	46.571	534.091	145.505	909.415	199	387.133	271.588	637.506	148.548	357.415	331.763	1395.2	230.425	514.133	96.234	672.333	291.702	1312.24	560.434	1648.79	369.115	1266.09	560.352	668.984	338.894	2337.2	986.068	920.046	306.279	1047.16	915.58	966.875	598.715	241.658	110.944	1081.34	227.23
-0.909091		1026.5	33.51	731.949	130.864	666.503	176.987	1200.97	211.059	534.554	283.62	814.832	184.939	507.085	395.258	1779.58	290.535	672.804	207.58	761.948	291.564	1841.24	435.968	2162.41	549.41	1209.96	513.901	742.892	393.839	2432.11	1096.66	1245.23	315.333	1152.55	986.27	1285.69	716.981	281.277	100.427	1213.12	284.5
-0.844156		1425.68	67.502	921.461	117.884	923.285	214.393	1309.47	112.369	611.968	360.11	1019.42	185.347	711.865	368.648	2201.25	404.058	814.69	248.195	972.483	398.739	2425.31	470.474	2837.86	512.194	1353.15	566.154	786.254	477.805	2523.12	1200.33	1486.75	367.687	1208.55	979.438	1456.09	923.827	391.98	143.56	1484.56	298.862
-0.779221		1665.77	42.207	1000.47	145.331	1127.45	266.266	1411.03	220.912	819.983	340.615	1214.49	181.234	979.32	398.677	2466.43	462.684	1001.58	291.858	1113.84	421.19	2789.59	548.127	3445.97	628.078	1456.18	589.813	1131.46	520.301	2711.18	1258.55	1671.93	435.106	1440.57	1049.62	1718.55	1042.4	376.947	200.24	1785.77	293.493
-0.714286		2301.2	179.391	1167.74	193.287	1520.5	253.045	1634.75	252.645	1026.19	484.929	1351.52	211.505	1195.77	523.999	2919.69	573.093	1211.86	375.17	1310.14	469.924	3273.41	684.068	4037.84	900.536	1665.24	656.874	1529.53	601.65	3029	1501.96	2069.4	534.295	1474.61	1146.81	2156.44	1193.36	562.612	223.45	1906.4	327.412
-0.649351		2741.58	210.81	1310.45	249.201	1985.78	348.729	1906.79	303.377	1275.72	543.482	1729.63	324.615	1525.08	626.077	3369.03	692.45	1428.15	589.322	1465.49	610.327	3651.26	812.641	4770.98	977.121	2006.28	711.346	1998.77	795.089	3329.64	1694.83	2634.21	638.316	1638.78	1253.74	2598.39	1405.84	708.112	240.09	1986.23	510.668
-0.584416		3351.38	271.868	1661.93	284.642	2431.84	520.692	2260.98	382.952	1613.31	627.601	2051.06	309.409	2008.11	883.207	3880.95	858.044	1750.93	632.464	1674.42	708.907	4191.14	954.578	5833.77	1134.49	2250.52	814.489	2642.54	924.125	3730.28	1849.98	3003.96	858.895	1811.32	1405.86	3152.13	1643.28	832.069	305.395	2443.85	507.892
-0.519481		4005.43	381.945	2132.99	402.059	3077.02	579.593	2915.77	379.51	1906.92	803.257	2373.24	360.942	2445.22	1608.44	4535.35	1110.13	1972.71	760.172	1883.56	881.657	4936.65	1215.31	7512.42	1637.7	2467.09	854.548	3372.6	1243.88	4339	2036.25	3653.39	1135.32	1976.65	1583.81	3854.69	1919.96	952.896	507.76	2899	557.509
-0.454545		4897.52	543.054	2545.82	580.026	3705.9	831.966	3556.49	501.932	2306.55	1038.95	2814	516.685	3014.56	3039.96	5348.65	1372.98	2166.69	998.746	2137.19	1181.32	5897.14	1692.65	9683.62	2006.19	2866.94	1133.26	4076.66	1565.5	5065.34	2461.57	4323.91	1482.62	2144.25	2244.83	4511.8	2140.4	1267.39	567.626	3452.86	811.203
-0.38961		6249.79	599.918	3337.32	667.609	4777.63	1472.11	4185.86	589.688	2708.68	1210.4	3247.02	730.744	3810.7	5629.53	6268.8	1874.84	2599.91	1298.99	2385.79	1492.29	7073.37	2571.93	11505.4	2835.91	3413.07	1490.48	4825.59	2250.04	5952.96	2974.35	5277.62	1968.58	2683.78	3047.58	5135.91	2604.95	1515.73	748.008	4012.42	1226.47
-0.324675		7673.26	1128.84	4065.32	876.05	5670.76	2395.49	5271.48	895.693	3238.09	1440.37	3652.36	957.597	4448.5	8089.75	7286.27	2543.64	3196.7	1682.45	2691.5	1767.56	8453	4080.76	13313	3867.28	3904.85	1989.58	5476.99	3404.38	7112.52	3700.79	6404.85	2725.93	3112.93	4388.77	5907.79	3488.84	1954.78	975.802	4757.52	1511.96
-0.25974		8994.06	2800.38	4790.8	1364.4	6503.07	3744.71	6099.1	1496.61	3829.51	1871.1	4145.2	1017.11	5466.27	10655.4	8571.23	3537.45	3805.9	2351.49	2853.56	2431.41	9712.03	6252.84	14770.5	5858.02	4771.7	2799.59	5965.52	4741.83	8232.97	4885.07	7482.39	4706.52	3669.5	6496.75	6494.12	4603.19	2349.28	1475.37	5897.06	2493.34
-0.194805		10196.3	6025.92	5385.35	2113.94	7175.5	5656.13	6988.47	2978.25	4884.13	3097.23	4549.59	1326.63	6328.27	12775.1	9779.19	4801.36	4660.33	3266.47	2983.92	2939.75	10616	8999.66	16145.1	10594	5284.26	4176.75	6239.79	5884.74	9308.6	7217.88	8375.24	7596.36	4171.39	9442.41	7507.19	6634	2744.45	2594.75	6932.81	4401.22
-0.12987		10907	10822.1	5722.29	3227.57	7958.94	7862.93	7806.48	5389.42	5354.95	4755.6	5054.22	2013.43	7161.4	14613.3	10466	6250.06	5810.8	4819.72	3137.98	3966.11	11534.9	11470.3	18135.3	16037.6	5982.61	5860.11	6461.87	7203.94	10715.2	10519.6	8936.51	10634.2	4636.83	12315.7	8286.88	9766.83	3125.3	4238.88	7805.87	7271.37
-0.0649351		11789.1	15463.7	5811.05	4446.28	8388.54	10344.4	8403.61	8073.56	5981.52	6267.11	5243.48	2632.3	7743.69	15784.5	11120.5	7353.15	7021.55	6160.99	3151.98	4624.65	11943.6	13906.5	19491.9	19991.6	6455.28	7360.81	6660.1	8440.59	12381.5	14333.1	8995.84	13065.1	5046.29	14295.4	8633.01	13234.2	3439.11	5690.1	8199.27	9924.25
0		11806.9	17782.7	5837.08	5067.1	8674.06	12197	8703.04	9769.28	6256.32	6349.39	5390.88	2930.36	8275.22	15876.9	11860	7627.57	7528.39	6871.11	3272.15	4945.84	12208.9	15353.1	19701.5	20762.9	6798.75	7627.12	6745.37	8853.96	13071.5	16542	9029.35	13394.8	5281.13	14479.3	8722.69	15582.6	3539.91	6056.66	8443.56	11215.7
0.0649351		11597.6	16479.4	5763.97	4947.32	8637.46	11786	8335.94	9218.28	6133.9	5133.72	5165.62	2540.28	8067.44	14387.5	11694.3	7078.26	7404.8	6508.97	3155.33	4874.85	12115.5	14981.2	18965.6	18210.2	6780.22	6450.75	6667.65	8067.96	13059.4	15151.3	8427.78	12966.5	5116.44	12397	8577.68	15412.1	3250.94	5050.87	8342.25	9550.93
0.12987		10899.3	12826.6	5532.88	4519.73	8483.44	10023.4	7644.23	6499	5532.71	3487.54	4468.55	1826.22	7809.84	12218.1	11316.5	6213.2	6902.15	5291.84	2859.17	4228.85	12013.8	12949	17979.6	15002.7	6460.49	4534.74	6210.69	6033.54	11994.3	11794.7	7324.32	12482.6	4803.33	9162.06	8294.07	13948.8	2762.32	3441.52	7592	6698.17
0.194805		10317.1	8989.15	5135.34	3655.7	7977.05	7819.52	6704.72	3752.74	4657.71	2103.35	3590.92	1234.3	7241.23	9464.36	10914.2	5173.59	6111.51	3945.34	2531.06	3488.9	12055	9604.76	15958.8	11515.6	5979.89	2733.87	6025.33	3773.24	10529.7	8072.44	6180.97	11525.9	4439.3	6081	7966.37	11165.3	2214.63	1859.02	7066.32	3969.44
0.25974		8862.01	6418.94	4701.79	2444.91	7047.11	5342.03	5696.38	1775.5	3764.95	1267.04	3213.47	778.605	6324.89	6607.36	10205.9	4007.72	5422.92	2932.28	2280.78	2930.8	11323.5	6765.57	14312.7	8677.58	5087.64	1437.64	5459.35	2345.54	8621.79	5280.2	5301.94	9643.35	3730.42	3714.32	7605.62	9095.59	1884.37	1084.09	6527.92	2129.67
0.324675		7636.68	4977.88	4114.62	1579.28	6476.52	3950.81	4846.09	1172.03	3187.31	865.714	2631.97	639.498	5380.24	4426.27	8960.96	2927.12	4822.73	2234.62	2070.89	2394.52	10103.6	4947.27	11637.4	6310.12	4056.79	786.623	4666.98	1575.28	6907.06	3447.7	4322.61	6962.87	3030.96	2250.94	6918.52	7820.02	1531.06	813.161	5642.33	1106.85
0.38961		6848.41	3767.74	3716.46	1080.57	6136.31	3138.05	4078.26	797.28	2542.4	716.416	2249.39	574.075	4570.47	2908.35	7477.32	1911.94	4057.84	1779.5	1911.46	2023.04	8813.23	3809.29	9249.92	3959.92	3326.11	549.103	4074.22	1299.71	5620.48	2229.07	3553.07	4158.37	2438.48	1394.39	6172.41	6777.04	1264.09	580.306	4918.6	645.236
0.454545		6191.39	2914.1	3405.91	847.908	5678.94	2458.45	3436.81	546.841	2048.29	404.31	2002.47	481.927	3578.59	2011.17	6033.16	1207.6	3606.84	1438.72	1686.08	1721.23	7614.15	3032.56	7437.98	2208.22	2602.67	430.732	3590.77	1020.44	4759.77	1441.91	3145.16	2101.2	2007.14	875.214	5718.38	5758.75	1120.99	531.831	4083.62	439.15
0.519481		5607.63	2243.82	2965.78	640.769	5094.92	1755.18	2939.87	341.64	1676.48	376.303	1685.53	326.619	2900.28	1361.26	4935.31	818.088	3042.53	1112.42	1387.2	1455.93	6246	1816.68	6091.7	1011.53	2109.27	280.288	3051	624.283	3800.39	1088.14	2754.15	1007.18	1749.39	620.023	5068.94	4766.79	854.698	448.224	3318.88	263.547
0.584416		5343.48	1729.63	2615.05	501.855	4317.44	1050.25	2419.65	293.952	1416.75	376.835	1420.66	274.469	2213.94	974.732	3880.28	572.031	2741.3	1073.76	1235.14	1329.79	5056	1127.89	5093.41	593.472	1889.92	274.218	2394.44	358.592	3074.58	948.33	2255.63	751.333	1438.02	382.382	4452.56	4168.72	711.935	398.968	2704.14	153.722
0.649351		4765.24	1453.56	2235.61	340.775	3608.22	744.803	1839.29	192.201	1174.27	258.71	1051.27	241.722	1554.55	854.113	2858.42	428.186	2201.81	829.792	1194.94	1201.77	4139.9	800.073	4027.49	497.707	1581.46	314.676	1869.79	282.439	2578.67	650.547	2095.8	642.254	1306.36	329.565	3967.27	3630.16	637.46	362.666	2191.8	139.264
0.714286		4368.74	1155.18	1777.16	304.719	2738.46	478.445	1480.38	247.184	1097.2	134.233	970.583	173.075	1185.14	648.034	2228.1	325.315	2003.37	670.829	1002.54	988.017	3353.22	571.718	3522.55	301.022	1163.47	185.344	1498	176.881	2142.19	537.985	1748.97	413.283	1107.82	220.148	3435.74	3160.44	517.655	284.883	1715.13	132.009
0.779221		3786.34	951.029	1352.11	331.512	2187.76	479.673	927.989	228.104	1001.86	87.454	622.366	166.558	1081.38	569.759	1874.36	261.052	1601.4	463.854	1001.69	925.305	2759.19	421.454	2849.66	228.953	892.647	96.522	1204.1	139.227	1802.9	437.982	1460.14	365.357	889.189	158.467	3143.61	2850.65	569.955	179.284	1478.71	155.804
0.844156		3339.52	787.989	1013.75	199.713	1581.76	447.769	630.768	183.886	824.495	138.042	499.902	178.546	781.432	495.405	1275.64	180.428	1327.58	342.54	771.694	839.195	2314.63	345.485	2276.57	247.274	722.266	152.744	812.683	236.122	1433.69	327.257	1184.74	380.516	664.029	88.287	2722.65	2379.22	371.754	171.704	1066.96	141.077
0.909091		3035.15	707.589	786.97	123.722	1208.35	294.979	462.106	119.692	738.092	14.35	484.955	166.93	576.358	417.842	1001.71	150.304	1186.65	264.88	585.487	771.041	1841.96	264.351	1722.72	163.433	620.621	184.818	632.617	34.089	1121.28	320.377	972.041	253.128	525.361	122.937	2491.11	2167.64	279.264	155.52	799.287	87.748
0.974026		2770.19	628.349	610.97	143.524	1041.16	214.098	328.688	71.978	546.147	36.227	416.198	139.313	432.877	258.63	702.589	40.836	974.05	197.275	445.569	561.28	1431.49	260.845	1523.93	140.926	438.004	153.244	449.933	58.828	978.779	297.486	761.458	213.44	388.222	135.508	2184.4	1890.66	212.169	122.209	605.901	128.634
1.03896		2442.53	511.171	401.393	133.201	832.563	181.625	284.853	73.446	401.06	129.546	308.89	87.624	298.994	266.079	553.268	178.556	799.192	128.043	455.129	408.046	1163.79	220.657	1402.03	156.484	310.07	165.539	322.123	88.289	831.933	311.006	563.676	132.289	265.376	88.438	2008.82	1565.54	126.565	105.169	440.295	0
1.1039		2108.93	420.74	300.284	119.198	582.827	100.093	226.306	100.379	208.061	122.622	243.039	0	216.327	256.09	373.683	122.722	671.415	121.486	354.473	436.225	859.275	178.626	1148.34	59.487	275.924	73.745	290.942	82.945	595.405	181.102	434.807	168.773	196.557	70.445	1836.71	1403.33	160.217	152.926	371.667	77.263
1.16883		1757.95	370.833	129.952	149.151	404.308	219.19	220.463	101.301	215.173	168.886	262.79	92.683	141.977	107.262	269.013	41.834	558.031	157.629	291.116	399.297	483.661	177.079	982.014	92.594	255.755	113.529	215.092	29.139	431.828	58.557	340.736	39.452	176.483	15.277	1538.14	1148.81	86.323	82.795	194.166	58.473
1.23377		1523.51	373.723	158.526	157.884	269.391	205.237	131.401	0	66.569	101.416	135.345	159.83	97.948	130.727	173.841	0	453	82.652	264.522	324.993	312.285	0	791.371	103.649	245.009	21.448	87.155	0	356.677	105.382	145.865	85.108	229.777	46.064	1228.48	986.902	138.599	0	140.565	40.146
1.2987		1199.81	347.011	89.825	122.275	153.759	200.323	65.223	112.126	113.768	122.245	94.036	20.242	61.156	129.6	180.231	39.714	409.884	117.656	202.004	341.386	61.826	57.583	734.096	125.953	168.071	0	134.667	63.483	225.26	99.606	194.378	112.271	134.397	114.397	1025.14	805.933	115.852	13.521	88.57	79.543
1.36364		1120.89	389.824	122.159	19.417	128.777	168.496	59.15	64.383	29.045	110.002	38.736	59.188	50.842	126.538	109.925	31.416	363.559	56.12	183.135	267.128	0	92.338	725.766	25.428	0	37.164	48.637	46.697	112.09	32.671	114.418	57.047	20.664	49.77	1014.81	798.137	126.178	49.08	41.024	66.072
1.42857		1038.03	303.616	90.73	0	19.839	120.706	41.077	47.72	8.106	90.507	9.338	75.935	4.292	121.156	0	67.12	175.22	46.242	167.326	253.013	60.954	110.643	654.006	18.937	76.199	93.326	80.317	47.289	60.86	0	9.288	0	33.277	0	732.644	600.661	39.046	111.617	94.54	75.607
1.49351		945.763	305.007	0	2.896	0	96.126	0	23.002	39.254	43.164	0	0.499	22.419	115.164	37.496	63.733	246.919	45.509	143.155	245.203	14.489	90.085	651.825	106.301	91.814	69.093	0	62.562	0	60.346	0	102.244	0	18.57	532.246	577.101	15.292	137.563	0	32.114

## Sheet: 35 nM holo(H-dN)
Figure 2-source data 4
Figure 2F
Non-normalized values
	35 nM holo(H-dN)_150 min
Chromosome sample		1		2		3		4		5		6		7		8		9		10		11		12		13		14		15		16		17		18		19		20
		DAPI	mSMC4	DAPI	mSMC4	DAPI	mSMC4	DAPI	mSMC4	DAPI	mSMC4	DAPI	mSMC4	DAPI	mSMC4	DAPI	mSMC4	DAPI	mSMC4	DAPI	mSMC4	DAPI	mSMC4	DAPI	mSMC4	DAPI	mSMC4	DAPI	mSMC4	DAPI	mSMC4	DAPI	mSMC4	DAPI	mSMC4	DAPI	mSMC4	DAPI	mSMC4	DAPI	mSMC4
Distance (µm)
-1.49351		31.493	78.229	824.531	439.32	478.235	305.589	950.467	427.094	0	5.073	871.094	338.136	216.334	138.689	0	572.385	0	91.107	12.17	48.275	2.69	0	3703.75	1955.91	0	57.607	0	210.477	794.955	345.099	1655.1	1434.28	140.777	62.935	0	39.017	0	0	1500.74	907.484
-1.42857		30.749	70.886	823.802	413.286	421.387	283.51	972.386	411.025	60.741	21.819	835.586	317.428	242.62	138.604	19.936	472.885	59.185	164.27	40.26	120.264	0	10.684	3360.65	1787.74	120.244	34.524	35.775	222.907	896.124	286.149	1563.24	1321.34	236.943	71.658	59.135	0	47.459	40.4	1468.07	899.5
-1.36364		51.268	51.354	855.908	405.181	487.172	463.433	995.711	370.616	52.221	17.986	829.081	320.739	367.215	177.353	16.519	400.34	119.079	220.843	0	124.197	72.065	45.132	3113.58	1671.87	97	27.954	127.169	231.947	1003.69	269.624	1402.03	1201.2	233.835	90.989	57.849	25.173	214.694	74.063	1268.48	848.194
-1.2987		100.82	108.455	845.8	439.791	534.885	422.259	1017.8	373.999	75.307	56.276	812.525	382.976	250.426	185.378	33.909	244.025	136.226	280.117	57.286	112.505	74.075	55.831	2949.12	1457.52	142.93	0	197.343	283.046	930.735	282.74	1336.6	1097.09	279.846	103.454	78.611	78.786	340.628	62.875	1488.68	817.968
-1.23377		125.699	139.371	845.037	462.756	492.996	453.834	1031.95	363.434	153.973	49.531	754.833	243.823	381.329	236.872	66.41	220.401	224.857	292.515	32.36	0	82.63	57.954	2814.86	1224.64	219.339	5.301	322.321	281.504	1166.99	287.762	1272.32	1069.1	328.303	96.059	141.178	61.7	495.125	125.263	1345.07	887.613
-1.16883		50.332	126.842	911.941	504.585	544.598	446.811	1048.5	348.988	235.139	23.27	764.799	257.143	431.606	249.037	89.416	209.097	289.203	322.916	116.238	80.796	133.451	67.085	2668.36	1075.12	239.5	27.016	414.904	338.838	1288.72	305.064	1264.31	989.583	342.946	140.478	182.018	126.121	714.641	250.128	1429.69	744.758
-1.1039		269.894	166.164	966.573	508.592	604.604	547.617	1020.63	381.84	295.305	75.935	1016.44	252.487	538.72	207.379	177.114	227.088	438.381	351.749	214.421	118.21	189.923	134.242	2606.67	1105.54	272.996	121.64	584.054	404.342	1383.44	319.118	1202.16	926.741	391.001	191.66	204.859	140.873	943.539	321.665	1411.32	758.161
-1.03896		290.009	180.331	958.566	557.64	712.006	618.999	1080.29	362.242	339.818	123.904	1057.95	317.837	570.828	280.234	257.378	249.94	383.475	424.681	294.116	101.228	277.893	137.142	2599.95	1023.33	308.69	103.413	704.255	462.49	1542.87	377.709	1243.92	874.779	397.165	144.401	282.208	78.172	1165.88	364.818	1513.6	807.855
-0.974026		377.444	234.12	957.189	548.368	781.66	700.065	1140.79	395.604	467.458	240.911	1137.51	286.714	608.281	287.956	389.006	284.688	585.664	512.438	362.42	195.665	343.587	176.317	2639.94	999.535	372.211	124.607	813.416	539.739	1616.84	412.165	1315.41	886.065	447.685	237.725	359.947	162.987	1303.64	487.85	1492.81	856.903
-0.909091		405.805	342.725	1183.42	643.305	877.397	698.595	1087.37	417.142	537.423	262.97	1330.09	317.597	766.421	307.101	562.211	201.365	644.868	544.04	562.913	146.335	376.252	199.832	2651.49	920.911	471.632	177.107	1113.18	654.56	1739.71	477.541	1364.98	948.59	549.424	300.751	408.232	246.724	1575.67	595.524	1511.48	775.161
-0.844156		566.836	451.826	1368.76	729.57	983.824	721.968	1259.08	500.775	764.8	222.438	1642.37	226.809	981.368	396.688	765.259	387.48	766.828	606.753	790.806	200.346	511.452	248.804	2905.35	961.17	503.752	150.888	1366.67	830.701	2102.89	499.809	1467.26	1048.27	711.806	328.899	558.558	319.464	1797.73	725.852	1562.36	846.129
-0.779221		779.99	559.901	1487.36	842.041	1108.02	928.354	1497.18	483.74	1102.43	220.037	1977.5	343.833	1263.12	512.713	949.79	370.762	965.202	766.618	1093.81	299.883	725.479	302.606	2998.42	966.242	576.905	283.107	1668.8	956.151	2319.77	590.839	1577.71	1085.62	825.756	420.715	728.22	369.535	2024.59	881.256	1823.1	879.29
-0.714286		1111.5	773.73	1755.77	1033.85	1241.31	1091.86	1562.94	524.856	1480.49	403.707	2442.34	375.238	1599.47	646.164	1137.99	381.383	1096.85	869.685	1477.1	377.504	956.859	364.69	3413.38	932.83	901.244	290.946	1996.2	1191.29	2698.46	653.143	1826.71	1140.12	1021.33	557.426	888.756	560.411	2245.42	991.246	2033.29	1061.68
-0.649351		1153.95	1040.96	2029.38	1345.3	1600.04	1254.57	1732.17	607.429	1986.3	615.734	2981.23	414.955	2002.62	746.474	1587.52	561.805	1313.28	998.398	1888.4	426.322	1191.97	428.061	4080.11	1015.66	1237.98	540.248	2319.54	1533.57	3216.21	770.738	2159.54	1289.11	1386.82	700.58	1105.02	815.764	2484.86	1120.71	2282.55	1255.06
-0.584416		1450.85	1340.51	2448.12	1687.64	1996.11	1465.2	2024.38	790.279	2552.09	646.991	3558.84	623.299	2745.14	891.837	1988.7	637.408	1602.55	1192.35	2448.2	623.344	1468.24	541.832	4712.55	1009.08	1494.43	826.219	2722.88	2099.9	3537.09	941.228	2680.98	1543.55	1788.62	923.012	1320.84	1065.33	2954.14	1298.99	2758.81	1392
-0.519481		1767.75	1676.26	2883.37	2257.83	2490.12	1770.19	2427.99	937.427	3249.06	828.933	4422.23	766.096	3489.56	1111.39	2606.9	855.54	1936.76	1433.65	3053.2	885.283	1854.65	741.473	5600.32	1090.46	1952.68	1108.13	3321.52	2712.97	4171.3	984.71	3310.69	1812.2	2251.82	1077.94	1649.37	1396.48	3654.2	1570.75	3107.53	1607.42
-0.454545		2132.23	2058.4	3423.11	3287.1	3090.45	2290.62	2987.44	1009.15	4051.28	1292.59	5453.26	937.102	4445.51	1567.94	3120.01	1131.46	2334.91	1743.3	3918.98	1373.72	2292.14	1028.96	6895.54	1311.87	2569.87	1521.6	4039.29	3708.24	4772.23	1388.15	4104.52	2286.23	2931.49	1385.4	2150.85	1864.49	4222.78	1762.68	3466.55	2043.36
-0.38961		2868.5	2684.6	4018.32	5301.76	3935.67	3062.63	3640.11	1165.24	5132.86	2360.27	6428.92	1284.81	5449.96	2026.35	3852.28	1521.18	2722.22	2076.8	4648.91	2033.47	2736.41	1333.84	8401.04	1607.7	3253.1	2135.48	4901.64	5691.54	5498.28	1823.19	5200.79	2944.67	3787.73	1922.06	2783.12	2702.18	5011.76	2112.72	3944.84	2621.4
-0.324675		3719.8	3762.91	4739.22	8480.46	5211.71	4801.37	4638.52	1398.9	6831.19	4097.19	7834.17	1936.02	6532.14	2609.63	4467.76	2200.97	3039.03	2599.95	5378.86	3001.18	3220.88	1867.51	10254.6	2179.85	4310.96	3060.34	5853.55	9060.47	6258.15	2586.15	6124.39	3831.89	4599.6	2741.1	3495.55	4197.68	6185.93	2646.52	4918.81	3980.35
-0.25974		4341.7	5434.27	5431.71	11956.9	7023.01	7835.62	6198.14	2318.71	8885.18	6597.99	9728.89	3150.09	7581.81	3846.98	5493.73	3801.27	3417.91	2979.63	5901.89	4288.64	3793.45	2694.96	12041.9	3342.59	5404.36	5070.35	7075.02	12548.3	7012.2	4900.06	7066.81	4929.39	5436.26	4094.94	4469.74	6470.34	7818.49	3789.69	5539.19	7002.26
-0.194805		5083.08	8332.81	6294.34	16172.5	8704.9	12878.1	7476.95	4138.04	10538.1	10052.1	11137	4988.93	8512.14	7134.5	6191.15	6073.82	3867.84	3883.72	6521.14	6227.18	4377.31	3896.59	13504	5182.83	6368.42	9488.78	8070.17	16276.4	7919.54	8893.17	8170.87	6617.47	6237.05	6320.66	5689.01	10246.4	10107.5	6267.54	6510.65	11770.7
-0.12987		5740.58	11594.2	7275.9	21131	10244.1	17153.8	8669.13	6930.09	11724	13989.4	12447.6	6984.39	9138.95	11671.3	6674.77	8884.6	4306.93	5637.79	6952.31	9151.98	4931.44	5479.98	14735.2	8170.34	7468.67	16185.5	8763.54	20304.8	8730.47	13330.1	8946.58	7896.65	6638.52	9189.34	6670.13	15347	12092.9	9500.13	7279.77	17028.8
-0.0649351		6131.93	14569.6	7721.41	26409.7	11286.1	19971.6	9221.13	8685.39	12440.4	17242.7	12896	8600.29	9817.85	15305.7	7286.92	10980.7	4462.51	7279.17	7628.07	12029.8	5411.43	6902.05	15193.8	10902.8	8156.89	23766.6	9298.79	23973.5	9512.91	17067.4	9226.76	8526.4	7124.76	11453.5	7697.86	19933.8	13445.7	12833.1	7795.87	21294.6
0		6298.87	15889	8057.5	29757.2	11680.8	20343.9	9402.43	8969.03	13075.7	18537.3	13009.8	8950.36	10211.6	15861.4	7640.04	11223.1	4662.14	8471.22	7703.43	14027.8	5720.18	7836.82	15518.1	12153	8697.24	26462.2	9391.3	25695.9	10033.8	18580.7	9250.65	8745.34	7434.43	11822.4	8221	22089	14081.1	14434.5	7763.03	21751.4
0.0649351		5469.84	14970.6	8016.16	29732.2	11468.9	19447.5	8837.66	7282.46	13037.9	15936.4	12526	7624.81	10183.5	12713	7624.22	9927.22	4399.12	8269.98	7599.6	13605.8	5671.63	7762.5	15008.6	11164.5	8599.52	23221.1	9140.84	23276.4	9959.15	17321	9095.84	8322.8	7199.24	9893.96	8108.89	20694	13830.3	13117.5	7419.19	19374.3
0.12987		4363.22	12083	7997.39	25408.7	10906.4	18059.8	7566.96	4484.87	12206.6	11153.3	11512.5	5556.85	9702.11	7983.75	7229.04	7268.1	3799.66	7013.39	7235.93	11476	5357.83	6408.75	13884.9	8562.47	8300.81	16295	8535.61	17335.9	9038.74	14677.7	8979.47	7435.11	6314.25	6841.61	7366.15	15978	12541.6	9893.06	6744.82	15857.5
0.194805		3526.51	8273.86	7609.45	18384.7	9555.6	16219	6052.73	2423.99	11202.5	6441.07	10032	3772.24	8729.99	3995.35	6551.16	4585.8	3572.62	5389.31	6940.73	8138.77	4797.15	4714.16	12262.5	5895.45	7250.43	9629.44	7509.09	10929.4	7751.28	11117.5	8333.64	7172.09	5092.8	4162.17	6363.54	11167.1	10239.8	6501.18	6022.84	11897.1
0.25974		2675.84	5163.64	7044.14	11944	8089.14	12852.3	4807.47	1402.09	9705.56	3592.84	8115.92	2547.36	7344.68	1929.36	5589.31	2594.76	3024.05	3894.03	6407.53	5219.58	4256.46	3298.83	10409.3	3958.21	5979.54	5531.86	6372.7	6052.05	6238.62	7450.34	7408.74	6553.15	3900.83	2450.99	5456.03	7431.01	8035.84	3845.89	5075.21	8454.81
0.324675		2274.81	3172.27	6306.74	7507.6	6494.57	9322.77	4005.81	1020.69	8157.67	2141.8	6481.76	1859.65	5785.15	1214.96	4678.83	1526.28	2627.38	2564.53	5756.19	3292.58	3632.11	2269.2	8141.3	2787.97	4926.55	4132.8	5185.17	2973.1	5005.01	4432.43	6429.69	5602.95	2882.24	1683.4	4284.23	5168.11	6216.15	2607.72	4214.81	5863.74
0.38961		1805.27	2116.7	5490.91	4476.23	4919.79	5933.17	3214.07	760.537	6302.19	1446.11	5423.28	1608.86	4536.35	909.975	3710.02	1030.22	2114.93	1523.14	5053.09	2349.57	3026.65	1640.26	6128.78	2346.3	4154.76	3596.41	4138.44	1939.94	4118.02	2201.42	5586.73	4884.13	2139.62	1307.61	3474.39	4028.86	4673.2	1911.83	3155.63	4003.1
0.454545		1394.24	1474.64	4651.22	2944.73	3552.55	3219.48	2545.47	621.189	4985.15	1075.61	4262.33	1354.03	3524.39	572.752	2819.81	698.048	1868.87	958.597	4223.77	1754.33	2558.92	1282.32	4578.16	2086.33	3419.66	3098.04	3463.89	1378.84	3443.73	1320.84	4519.1	3956.26	1637.52	956.02	2634.81	3278.09	3736.95	1442.02	2629.16	2732.26
0.519481		1031.24	1032.23	3730.76	2041.69	2559.4	1543.39	2086.08	474.618	3807.73	852.682	3543	1032.14	2507.07	382.144	2267.12	560.134	1473.51	697.557	3334.01	1174.49	2085.74	1109.79	3558.49	1777.27	2710.34	2573.2	2875.89	1022.44	2718.94	1050.17	3754.05	3249.37	1291.23	701.313	2093.58	2714	3054.34	1202.95	1912.08	2116.05
0.584416		797.278	782.925	2985.88	1494.35	1799.04	691.85	1645.53	299.424	2809.28	674.733	2877	953.068	1743.2	374.993	1674.88	440.787	1151.44	438.392	2749.45	932.973	1718.95	1014.53	2819.61	1460.5	2295.95	2028.35	2304	818.999	2228.59	792.385	2970.48	2709.13	1018.46	470.535	1781.34	2268.87	2581.11	1187.08	1626.23	1699.55
0.649351		664.126	579.655	2203.77	1205.26	1241.31	314.74	1370.85	222.808	2077.21	565.501	2557.96	784.557	1290.87	269.54	1207.61	341.446	898.643	364.402	2123.03	776.351	1466.53	973.261	2216.98	1112.96	1858.21	1469.61	1793.57	659.049	1687.59	556.115	2387.84	2296.27	827.895	314.992	1638.5	1774.06	2267.92	1014.15	1262.07	1249.89
0.714286		634.996	402.317	1522.79	1117.86	900.365	319.017	1124.3	150.251	1492.26	431.617	2187.91	600.802	802.476	254.405	771.347	271.689	702.394	306.096	1617.03	613.942	1328.22	990.259	1707.86	901.201	1546.24	1190.2	1474.32	438.262	1323.68	451.551	1855.99	1816.47	634.787	258	1318.86	1386.62	1851.81	975.106	1060.39	915.129
0.779221		387.807	240.705	980.207	837.92	769.27	229.073	836.369	125.23	1140.4	315.655	1814.66	500.224	462.833	154.598	643.442	236.067	619.007	173.292	1275.05	523.216	1155.41	1004.77	1305.51	684.075	1257.75	931.371	1111.74	241.484	1049.01	338.641	1408.28	1489.14	476.167	222.639	1050.08	1229.24	1730.66	922.546	781.178	719.371
0.844156		326.481	216.302	757.402	602.571	527.676	124.296	733.182	61.427	878.45	217.667	1405.53	435.17	321.586	158.917	462.672	247.1	530.895	174.003	956.604	401.54	1080.7	1023.51	1099.72	503.56	1097.5	830.095	946.648	251.15	963.678	250.46	987.469	1176.47	370.868	125.35	880.427	987.019	1619.83	761.16	684.323	541.903
0.909091		213.937	149.254	612.118	450.762	351.661	51.873	551.099	72.567	690.649	158.911	1090.12	346.507	314.544	124.934	322.983	204.851	423.195	130.697	756.436	396.069	1064.89	1010.46	906.871	438.833	865.054	668.351	724.203	228.841	780.204	186.013	715.122	934.342	317.399	53.597	784.504	857.822	1487.12	709.301	643.71	400.081
0.974026		269.176	131.807	428.88	424.66	251.794	28.838	484.413	55.128	556.378	159.306	790.469	241.365	259.702	160.726	314.395	108.81	334.042	162.119	569.237	330.038	1091.02	1002.36	697.374	351.15	768.17	580.863	451.698	246.407	563.122	126.609	546.117	814.143	268.452	76.336	679.044	734.825	1524.16	648.757	398.742	311.484
1.03896		191.181	134.435	339.446	423.689	199.526	20.083	364.944	40.618	397.372	108.204	546.611	199.569	165.014	96.934	228.92	127.066	286.637	99.565	462.698	308.585	1129.89	1121.6	530.746	244.726	720.426	509.557	501.721	196.878	526.573	128.46	429.718	688.897	159.107	81.542	573.872	643.953	1315.66	706.499	325.791	246.532
1.1039		140.006	71.588	184.087	273.866	131.314	89.837	366.1	37.697	379.991	34.26	386.353	146.49	158.19	33.49	235.256	60.309	269.271	97.148	393.346	274.94	1235.74	1182.56	446.981	237.814	648.562	413.053	391.259	65.369	325.88	102.701	350.854	543.06	87.248	22.382	486.499	565.8	1492.59	686.012	289.968	203.613
1.16883		143.988	63.261	123.437	166.694	103.86	28.47	296.312	34.926	319.879	0	350.418	114.878	111.918	73.936	190.614	35.859	287.863	124.874	337.443	233.188	1468.62	1154.47	427.751	169.051	524.665	324.748	307.566	75.37	407.857	74.927	246.293	484.473	51.677	35.849	534.383	516.384	1340.95	662.648	275.259	76.194
1.23377		84.445	80.12	159.88	159.4	56.188	56.945	219.356	23.538	349.396	36.062	256.246	37.839	67.666	57.507	126.794	161.887	235.982	60.681	305.622	174.232	1692.72	1269.05	295.858	95.696	464.017	308.599	200.271	58.819	302.981	48.194	150.373	352.547	77.145	34.969	505.335	421.714	1396.96	584.477	138.129	67
1.2987		0	51.166	55.47	50.906	27.45	5.71	88.862	49.246	263.03	77.451	212.754	52.833	72.595	32.791	130.47	132.497	233.446	99.543	232.611	152.225	1903.24	1440.25	211.423	91.338	372.814	282.33	113.342	0	263.068	19.019	71.569	170.935	42.387	24.445	397.543	445.142	1309.51	582.731	91.968	30.468
1.36364		20.522	43.458	56.895	67.029	41.091	0	121.926	0	238.95	32.685	135.717	21.766	46.134	59.16	130.503	73.078	80.26	75.573	193.998	139.309	2291.88	1538.44	77.187	39.635	355.922	262.607	80.781	126.237	90.122	30.559	31.282	88.548	26.307	0	343.484	520.123	1371.28	686.155	109.323	29.613
1.42857		65.567	0	0	37.975	12.246	29.859	67.61	45.999	258.691	16.643	67.425	64.032	0	0	122.327	40.819	143.317	0	178.892	94.269	2893.44	1794.17	11.772	0	355.244	137.103	32.819	35.971	102.557	39.465	0	62.174	0	46.65	333.484	573.49	1274.2	658.243	94.42	48.532
1.49351		71.071	7.356	10.957	0	0	3.859	0	17.609	193.661	35.107	0	0	12.741	54.899	65.357	0	190.838	66.184	182.221	114.839	3746.99	2030.36	0	4.829	174.389	167.5	3.115	17.911	0	0	9.742	0	0.506	30.858	324.119	646.267	1388.47	672.816	0	0

## Sheet: 35 nM holo(H-N19D)
Figure 2-source data 4
Figure 2F
Non-normalized values
	35 nM holo(H-N19D)_150 min
Chromosome sample		1		2		3		4		5		6		7		8		9		10		11		12		13		14		15		16		17		18		19		20
		DAPI	mSMC4	DAPI	mSMC4	DAPI	mSMC4	DAPI	mSMC4	DAPI	mSMC4	DAPI	mSMC4	DAPI	mSMC4	DAPI	mSMC4	DAPI	mSMC4	DAPI	mSMC4	DAPI	mSMC4	DAPI	mSMC4	DAPI	mSMC4	DAPI	mSMC4	DAPI	mSMC4	DAPI	mSMC4	DAPI	mSMC4	DAPI	mSMC4	DAPI	mSMC4	DAPI	mSMC4
Distance (µm)
-1.49351		0	10.976	0	47.572	0	141.353	31.488	43.446	0	0	474.645	496.483	160.084	121.387	18.992	49.669	0	2.521	88.857	0.566	52.471	0	27.137	0	0	32.255	0	0	75.167	31.855	939.079	1155.95	0	0	1370.08	1108.79	7.21	159.927	1546.17	1277
-1.42857		27.708	28.869	16.545	40.063	68.801	55.857	36.208	0	9.795	27.377	500.444	534.064	177.765	162.817	18.706	15.392	23.701	23.389	115.449	1.155	37.527	3.223	54.636	28.51	66.532	93.817	99.573	53.517	109.29	17.97	1012.47	965.345	40.315	48.73	1493.38	1037.99	35.025	184.184	1419.84	1166.59
-1.36364		74.442	52.68	63.179	73.715	144.51	0	0	28.579	18.249	44.78	535.11	522.847	154.544	152.8	0	66.085	64.791	0	80.65	16.39	0	30.627	20.672	48.678	66.367	85.42	141.094	58.708	98.76	56.901	1076.46	994.255	95.021	65.353	1606.07	1050.91	145.521	162.985	1418.18	1123.11
-1.2987		85.886	54.077	136.5	75.741	192.65	110.604	9.376	43.165	90.315	104.937	572.715	567.769	232.13	141.237	22.482	107.623	163.59	18.833	137.129	120.363	8.836	99.556	36.316	88.491	78.473	56.841	119.837	29.399	132.909	92.97	1085.55	1123.93	44.235	101.059	1552.36	1126.9	200.59	287.847	1497.03	1128.3
-1.23377		33.917	73.392	136.464	93.929	154.528	154.424	66.16	47.814	75.798	155.553	572.913	672.237	338.54	124.344	29.009	83.759	299.847	30.562	0	0	101.59	55.479	0.951	78.28	69.343	46.515	137.573	38.902	217.467	48.626	1170.89	1146.27	144.022	18.002	1679.53	1099.72	293.607	192.071	1427.96	1206.92
-1.16883		76.783	60.189	200.179	119.759	301.094	209.349	109.424	30.415	47.853	104.954	578.914	720.993	196.532	174.582	79.46	10.54	456.076	100.167	174.897	16.299	87.793	20.994	0	27.991	58.657	64.764	120.906	61.052	236.013	124.504	1402.19	1184.9	132.771	114.505	1850.57	1131.84	264.269	205.27	1276.12	1183.84
-1.1039		114.535	0	376.607	147.286	194.557	218.02	80.904	66.662	81.614	140.866	721.717	783.368	244.325	214.314	149.075	0	615.819	59.375	158.534	67.83	105.825	138.237	40.092	62.412	125.278	64.716	145.205	56.902	267.135	138.115	1518.48	1119.48	213.098	151.743	2034.85	973.423	386.227	332.399	1270.16	1029.35
-1.03896		119.54	38.19	391.116	227.081	270.74	261.096	71.4	126.135	161.967	171.342	781.586	861.802	340.083	214.939	314.94	62.634	738.284	81.278	180.324	87.488	105.039	108.208	64.448	207.289	178.532	58.355	306.573	151.468	290.145	164.561	1763.86	1114.19	299.822	217.835	2267.03	1109.72	295.039	334.809	1431.65	998.406
-0.974026		92.532	62.821	566.357	265.965	289.968	300.147	120.676	127.034	147.019	213.965	966.682	1027.16	283.743	263.938	324.763	88.888	853.722	102.479	251.063	130.832	163.203	104.767	126.504	228.042	245.775	109.225	369.5	271.583	377.33	163.75	2147.24	1195.63	396.683	230.462	2461.46	1071.76	420.921	410.612	1555.3	1036.8
-0.909091		144.637	44.208	601.938	350.009	394.44	409.376	218.992	163.539	201.124	248.323	1182.43	1050.82	471.647	362.59	469.662	52.292	1058.59	101.333	261.501	153.1	317.422	155.449	143.067	175.882	343.473	162.095	507.073	230.83	423.862	172.9	2477.05	1149.45	408.051	297.988	2579.16	1067.23	486.899	422.071	1544.09	1015.47
-0.844156		257.409	42.569	779.75	541.429	443.15	401.014	211.792	140.778	253.815	222.62	1486.03	1221.51	648.112	423.095	699.018	87.011	1270.35	136.667	333.368	227.694	388.691	185.329	116.894	189.945	405.118	187.409	644.635	327.597	533.916	321.568	2770.63	1179.85	490.596	471.114	3011.16	1065.92	538.65	497.902	1647	1041.86
-0.779221		418.244	85.332	1125.95	532.741	451.741	433.159	350.616	169.067	357.939	352.821	1801.82	1404.61	750.996	436.402	983.534	94.941	1454.64	171.583	470.792	182.477	475.706	280.134	234.077	255.569	544.136	296.858	781.184	389.677	730.817	347.168	3272.29	1260.8	541.287	583.533	3414.55	1029.28	673.671	478.402	1739.43	956.743
-0.714286		602.485	87.93	1363.5	743.536	591.679	459.837	593.4	154.157	603.269	310.223	2138.36	1644.47	857.126	478.356	1278.94	156.215	1778.13	191.604	625.219	149.591	730.952	312.759	415.028	563.092	681.97	314.852	943.771	349.291	956.438	454.82	3772.88	1421.42	723.54	796.497	3758.21	1117.2	1006.13	551.343	1873.81	1128.08
-0.649351		907.148	103.794	1795.15	900.759	679.129	449.113	904.192	282.733	879.725	345.623	2832.08	2100.24	888.287	520.567	1630.07	229.128	2046.16	197.667	898.845	233.983	1027.72	305.831	611.041	619.519	940.609	472.45	1187.82	432.878	1222.71	623.27	4304.01	1592.97	874.88	1125.56	4316.93	1171.83	1288.48	533.222	2177.36	1247.67
-0.584416		1229.04	162.376	2189.89	1093.86	833.605	592.297	1218.46	229.226	1235.17	507.976	3539.85	2586.76	1126.33	524.858	1994.11	230.471	2649.1	188.778	1381.07	291.458	1422.44	436.561	841.002	916.588	1161.65	634.758	1290.96	428.208	1512.41	774.503	5152.08	1764.58	1050.76	1361.04	4940.37	1123.56	1921.98	742.794	2496.16	1328.32
-0.519481		1605.94	239.564	2907.12	1448.77	1307.63	698.274	1756.93	310.746	1686.53	689.261	4208.84	3367.7	1297.91	673.026	2464.25	352.114	3274.51	248.042	1914.63	331.083	1989.05	518.338	1069.29	1485.81	1408.9	950.243	1482.68	551.059	1807.57	973.263	5635.64	2373.29	1330.37	1736.82	5438.5	1276.3	2322.34	855.576	2867.21	1361.1
-0.454545		1961.2	264.372	3777.75	1760.86	1819.07	788.878	2376.12	327.64	2145.61	1182.23	5031.57	4643.7	1600.51	818.111	3076.54	523.34	3856.41	367.993	2963.76	422.445	2644.24	772.29	1400.15	2450.05	1709.83	1434.49	1875.73	840.833	2308.47	1216.22	6294.17	3209.67	1643.33	2112.73	6030.5	1354.47	3042.06	1263.36	3279.68	1530.5
-0.38961		2390.62	440.902	4795.44	2267.68	2351.32	927.778	2897	462.158	2850.07	1886.91	5686.63	6650.2	2014.8	1269.44	3962.02	924.222	4678.92	510.972	4323.52	553.195	3457.15	989.991	1909.93	4044.04	1909.25	2229.87	2255.18	1412.05	2886.97	1745.82	6834.89	4495.9	2001.31	2990.89	6630.38	1397.74	4187.33	1721.35	3811.24	2168.79
-0.324675		3052.86	890.196	5873.04	2857.14	2911.44	1210.32	3661.39	687.219	3466.93	3287.15	6187.3	8838.38	2659.28	2205.09	5263.59	1888.37	5624.58	683.958	5771	1035.98	4232.12	1342.45	2566.16	6559.16	2376.24	3531.06	2768.97	2766.32	3497.94	2686.42	7138.43	6160.27	2529.25	5212	7653.32	1592.63	5537.18	2658.48	4584.46	3495.85
-0.25974		3716.12	1762.66	7258.14	4053.74	3602.24	1805.09	4615.43	1272.83	4413.02	5750.01	7303.44	10560.7	3710.37	3983.18	6400.2	4274.39	6832.37	1240.69	6836.82	2054.9	5131.92	2363.58	3414.61	10031.9	3077.88	5939.46	3476.32	5427.76	4441.67	3640.45	7963.49	8317.63	3086.96	8918.32	8537.29	2411.09	6635.96	4437.94	5690.91	5673.89
-0.194805		4386.06	3918.26	9049.25	6538.29	4428.87	2889.49	5762.24	2797.79	5306.72	9434.05	8147.17	11819.4	5051.44	6671	7932.27	7776	7858.64	2459.53	8399.44	4664.48	5995.68	4636.78	4252.3	14673.5	3900.31	9458.97	4151.87	9884.46	5233.03	5121.74	8150	10797.2	3621.74	13830.1	10274.3	4564.92	7618.84	7880.83	6944.37	8919.73
-0.12987		4835.4	6946.21	10860.5	10438.1	5460.37	4326.39	6805.64	4939.24	5959.08	13551.8	8803.78	13138.4	6431.38	9873.81	9304.53	11830.6	8561.56	4265.17	9656.66	9094.19	6801.33	7770.38	4863.67	19804.7	4942.16	13531.1	4638.82	14751	5890.64	6962.46	8201.37	12821.9	4051.58	18995.9	11847.6	8455.3	8976.3	11710.9	7993.69	12635.4
-0.0649351		5298.4	9572.39	12002.6	14224.7	6606.58	5427.76	7695.2	7354.17	6464.46	16984.2	9304.91	14373.7	7163.25	12170.3	10138.4	15102.7	9069.91	6311.99	10620.2	13820.2	7111.3	10829.9	5169.27	23230.4	5976.47	16701.1	5206.98	18472.7	6753.16	8627.93	8281.01	13943.6	4312.1	22132.4	13168	12655.2	10009.3	16291.1	8877.11	16941.8
0		5622.32	10387	12447.4	15759	6933.88	6337.34	8198.64	8418.74	6695.28	18064.6	9564.79	14407.7	7383.5	12650.2	10523	16303	9198.92	7423.58	10971.9	16066.6	7165.03	11970.9	5366.53	23527.5	6516.2	16738.9	5208.92	18901.8	6938.64	9568.17	8416.79	14589.8	4319.45	22342.7	13203.3	15216.4	10548.5	18163.1	9333.67	18759.6
0.0649351		5442.66	9271.74	12265.8	14177.4	6532.05	5792.92	7840.43	7602.55	6437.75	16825.7	9457.27	12424.8	6886.32	10739.3	10477	15798.6	8777.52	7331.9	10856.2	15059.6	7004.31	11186.9	5266.61	20515.3	6424.14	14081.5	5009.89	17040	6758.79	8986.16	7983.55	14272.2	4069.1	19088.1	12367.5	14364.7	10225.7	16223.5	9253.09	18377.3
0.12987		5162.47	6761.39	11740.2	10227.2	5483.59	4572.85	6934.52	5758.73	6053.71	14130	9046.06	8931.19	6100.24	7717.8	10115.5	13268.5	7897.37	6080.25	10212.6	11389.6	6701.55	8290.63	5090.25	15397.7	6371.44	9964.45	4664.07	13769.4	6004.92	7319.33	7811.89	13241	3964.36	14602.4	11114	11097.3	9417.44	11924.8	8603.77	15279.7
0.194805		4864.68	4257.81	10943.8	6164	4795.64	3331.71	6120.91	3892.04	5539.03	10310.6	8226.36	5514.67	5528.21	5359.87	9150.9	9921.13	6972.33	4493.84	9014.56	7518.53	6408.83	5206.7	4799.85	10462.2	5806.49	6493.85	4008.55	11127.7	5096.44	5293.09	6991.67	12611.4	3652.08	10322.9	9396.28	7598.99	8457.66	7319.84	7918.8	11315.6
0.25974		4139.3	2584.88	9657.99	3278.79	4109.43	2304.89	4883.2	2589.53	4815.9	6784	7332.24	3240.88	4628.37	3848.42	7710.44	6483.09	5941.09	3213	7512.13	4591.28	5524.74	3039.3	4388.86	6813.79	5037.32	4114.04	3463.59	8552.15	4157.4	3528.37	6037.88	11487.8	3215.36	7161.47	7914.99	5445.61	7631.24	4408.64	7232.72	8094.09
0.324675		3640.62	1883.01	7997.43	1917.86	3457.61	2051.39	3678.78	1876.02	4158.43	4117.9	6229.39	1975.81	3820.81	2720.04	6439.49	3721.18	4925.12	2380.7	5893.48	2856.34	4780.51	1989.71	4073.79	4398.74	4147.15	2548.92	2788.57	5856.47	3268.66	2409.47	4865.46	9596.07	2632.13	5049.54	6577.18	4219.76	6555.52	3093.73	5990.76	5794.77
0.38961		3101.2	1571	6136.74	1390.06	2812.21	1812.52	2723.63	1344.62	3174.65	2873.78	4955.43	1188.07	3169.89	1961.46	5263.47	2270.9	4064.67	1768.56	4504.86	1983.63	4077.69	1561.42	3868.67	3202.91	3457.99	1590.66	2226.77	3938.99	2521.48	1848.31	3902.7	7248.18	2130.61	3822.33	5480.12	3578.38	5398.97	2431.1	4850.51	4683.47
0.454545		2475.89	1289.23	4777.89	1053.14	2300.75	1660.32	1910.3	1094.94	2566.63	2305.38	3768.67	729.574	2553.02	1390.15	4275.1	1589.97	3335.45	1409.98	3319.35	1531.36	3360.14	1358.99	3473.51	2361.22	2747.52	1050.14	1940.6	2580.79	2045.82	1519.42	2901.89	5646.78	1685.89	2644.86	4645.98	2981.12	4259.6	1748.89	3665.8	3662.25
0.519481		1910.94	1068.34	3847.88	757.429	2033.18	1447.16	1440.13	862.477	2228.57	1858.84	2747.96	464.174	1949.54	1026.07	3462.44	1215.84	2832.12	1223.5	2556.64	1280.49	2638.08	1057.85	2782.73	1731.65	2160.84	770.586	1674.57	2258.52	1599.89	1174.27	2293.1	4304.66	1352.98	1710.08	3940.19	2518.11	3543.57	1176.44	2924.74	2680.76
0.584416		1719.78	969.12	3069.86	651.608	1701.34	1257.72	1091.4	777.851	1732.34	1492.82	1944.23	312.667	1521.44	777.961	2849.07	1122.52	2307.78	1078.34	1886.36	1152.91	1869.32	986.999	2225.58	1142.29	1818.98	569.338	1471.67	1776.83	1233.11	892.8	1789.58	3261.08	1082.38	1244.49	3343.44	2088.36	3000.57	917.569	2261.67	2192.81
0.649351		1355.83	768.084	2509.48	484.17	1483.92	1233.05	913	711.988	1394.7	1119.69	1396.18	202.784	1069.3	596.597	2199.98	912.68	2039.52	865.25	1532.5	990.216	1381.79	835.411	1662.1	791.886	1412.63	415.361	1213.02	1614.96	926.474	685.1	1527.41	2504.12	857.191	917.252	2786.86	1584.25	2292.3	816.449	1780.89	1731.74
0.714286		970.501	667.48	1952.75	311.429	1309.08	1078.87	806.24	546.361	1155.36	1050.62	1057.89	172.641	809.356	446.388	1817.38	818.657	1854.37	734.368	1148.25	742.034	1011.92	857.208	1231.8	615.858	1054.48	269.77	1117.63	1396.26	768.208	504.546	1142.61	1896.79	713.709	730.998	2378.25	1212.63	1863.02	602.847	1411.65	1258.08
0.779221		793.951	528.147	1494.9	233.438	1134.04	952.075	668.784	533.965	921.202	947.119	881.421	159.999	625.36	373.019	1404.03	575.736	1545.26	657.611	990.389	639.898	956.619	649.189	1179.69	504.137	742.87	227.095	908.198	1362.68	591.997	346.338	928.394	1368.56	645.153	561.101	1933.09	1049.69	1364.47	442.348	1043.22	907.266
0.844156		606.983	490.95	1093.21	191.072	1020.73	921.608	576.988	373.093	695.327	757.198	680.805	105.354	447.26	303.651	1187.26	481.695	1404.71	569.667	809.565	571.948	768.606	488.967	997.355	442.856	525.751	231.74	743.042	1071.88	365.202	261.892	746.017	1124.76	461.862	433.949	1756.46	925.498	1105.51	459.729	908.396	747.175
0.909091		593.706	452.81	873.92	188.741	1059.79	877.392	474.6	343.285	628.879	687.325	440.213	67.651	279.255	231.288	990.181	351.27	1218.49	528.389	751.963	468.443	650.387	442.343	844.306	333.324	363.136	194.113	625.573	975.531	331.083	160.069	578.262	846.363	339.157	317.333	1443.57	739.235	904.782	358.378	819.614	618.501
0.974026		547.599	441.88	835.75	161.429	1054.3	837.844	412.244	378.139	562.806	667.752	282.199	79.112	187.923	129.877	909.781	345.569	1127.68	454.521	648.244	445.157	625.72	428.978	570.5	370.218	280.663	169.977	653.455	870.458	320.82	124.066	573.855	723.95	254.62	307.593	1210.77	690.069	585.268	237.394	557.084	431.037
1.03896		474.037	372.704	515.429	69.759	941.902	798.948	369.96	330.105	478.504	561.88	248.923	9.635	144.276	159.559	776.246	277.872	908.201	396.125	614.213	406.288	449.785	379.174	514.382	290.392	252.911	151.32	613.587	813.326	224.777	128.221	491.542	614.752	285.722	214.427	958.014	475.971	485.044	233.249	564.493	347.859
1.1039		454.79	306.389	496.857	45	823.714	822.539	374.544	347.215	463.201	424.764	198.285	3.017	243.13	201.922	661.397	202.394	887.68	411.035	558.429	348.593	367.454	392.633	490.856	225.595	252.456	96.835	590.667	791.416	77.517	73.034	399.103	467.555	228.258	226.958	832.942	452.077	363.098	209.787	432.542	325.834
1.16883		434.034	272.06	524.179	86.786	806.379	768.571	355.76	348.13	391.4	458.48	190.068	103.694	37.314	170.226	602.382	162.23	908.868	342.5	497.279	351.5	489.503	376.668	522.396	187.039	149.29	81.462	532.629	732.427	43.412	143.334	324.071	424.446	205.832	135.677	641.192	408.819	298.402	171.082	323.694	246.351
1.23377		381.657	269.52	485.607	80	812.722	751.848	257.7	302.079	356.489	475.442	162.645	115.789	103.705	97.429	600.934	133.833	820.812	335.312	458.67	298.039	459.102	436.237	541.754	206.855	82.592	72.787	515.722	734.708	0	88.324	216.68	376.49	238.14	209.667	447.214	182.094	145.857	182.195	246.096	167.612
1.2987		355.2	234.737	284.643	15.134	793.258	669.481	227.936	251.57	298.73	454.625	128.943	0	126.523	85.051	514.52	163.999	811.201	289.708	394.469	255.605	323.256	333.918	477.5	162.101	53.816	36.172	427.448	647.996	63.582	4.225	152.218	186.083	174.417	286.673	455.802	230.706	109.345	132.552	237.943	72.736
1.36364		314.317	135.864	240.643	0	882.628	713.099	242.048	217.939	269.517	350.324	0	84.915	45.218	36.149	453.687	136.661	809.951	328.458	418.694	302.729	287.372	223.805	482.123	161.663	37.994	74.645	471.493	612.833	19.703	29.542	77.459	154.691	228.565	201.674	430.71	143.08	69.141	105.125	183.572	67.37
1.42857		239.225	165.329	261.938	79.679	786.97	654.126	210.872	227.446	272.911	341.532	135.133	6.084	30.436	0	392.778	165.042	800.326	335.333	416.177	278.112	263.844	279.338	526.593	168.286	27.822	105.509	422.49	780.555	16.399	39.512	100.183	68.012	255.905	178.362	173.175	23.219	16.856	42.097	142.902	34.477
1.49351		308.909	143.711	212.179	12.429	727.355	686.909	199.152	211.226	205.47	326.983	89.439	25.724	0	1.752	380.756	37.736	781.618	268.16	363.406	211.975	262.319	274.894	587.525	172.502	11	0	383.635	881.847	34.927	0	0	0	302.872	215.707	0	0	0	0	0	0
