# Supplementary material for: Cell cycle-specific loading of condensin I is regulated by the N-terminal tail of its kleisin subunit
Source: eLife. 2022 Dec 13;11:e84694. doi: 10.7554/eLife.84694 (PMC9797191; doi:10.7554/eLife.84694)
Supplement: Figure 3—figure supplement 1—source data 1. [file elife-84694-fig3-figsupp1-data1.xlsx]

## Sheet: Supplementary figure 4B
Figure 3-figure supplement 1-source data 1
Figure 3-figure supplement 1B
Raw DAPI area and mSMC4 intensity values
		150 nM holo(WT)_15 min					150 nM holo(WT)_30 min					150 nM holo(WT)_150 min
		DAPI (overall)	mSMC4 (overall)				DAPI (overall)	mSMC4 (overall)				DAPI (overall)	mSMC4 (overall)
Chromosome cluster					Chromosome cluster					Chromosome cluster
1		55611	132925968		1		56361	171554096		1		28600	8993706
2		52660	114618193		2		53627	144225729		2		30483	28674733
3		70482	122385894		3		45024	84426387		3		30639	5349018
4		68272	59153842		4		46878	104184869		4		27827	28540275
5		57980	52783834		5		50580	136376347		5		29860	7623876
6		59056	75693736		6		41026	111701133		6		30744	6410533
7		64704	28406307		7		45350	86954733		7		28895	8059408
8		53541	55582017		8		47657	119075115		8		29450	17797721
9		66162	71034409		9		42807	132316530		9		28417	10899468
10		65671	107290481		10		42193	83803294		10		34282	1423057
		150 nM holo(H-dN)_15 min					150 nM holo(H-dN)_30 min					150 nM holo(H-dN)_150 min
		DAPI (overall)	mSMC4 (overall)				DAPI (overall)	mSMC4 (overall)				DAPI (overall)	mSMC4 (overall)
Chromosome cluster					Chromosome cluster					Chromosome cluster
1		42750	531408729		1		53688	1002949202		1		32391	132134689
2		46376	665559454		2		46963	614731673		2		30822	139040550
3		46769	684785854		3		47275	778490875		3		29271	157681089
4		44493	587806911		4		39640	681641403		4		29260	143937915
5		60836	908823601		5		46866	649275248		5		28794	139229477
6		68344	912106559		6		53165	891271321		6		30464	123328160
7		53588	961866396		7		44056	765245645		7		28611	139656933
8		51919	671261847		8		42930	868640507		8		29467	140001346
9		54424	675309031		9		45074	572183643		9		27528	156178628
10		47249	577079339		10		56363	1034583634		10		32270	175784257
		150 nM holo(H-crCH)_15 min					150 nM holo(H-crCH)_30 min					150 nM holo(H-crCH)_150 min
		DAPI (overall)	mSMC4 (overall)				DAPI (overall)	mSMC4 (overall)				DAPI (overall)	mSMC4 (overall)
Chromosome cluster					Chromosome cluster					Chromosome cluster
1		56009	822011140		1		48336	842156657		1		31247	120197103
2		52677	855051743		2		41090	691644556		2		30241	107577906
3		52346	605875461		3		48826	603718804		3		27769	137570516
4		36771	409198477		4		48784	771115790		4		28567	136275506
5		41460	513938285		5		49038	752538242		5		31428	139731770
6		43983	488890645		6		42362	661113082		6		27006	138147521
7		38954	481605693		7		50089	998215065		7		24186	113011484
8		52131	590210374		8		52266	649428753		8		31213	149960778
9		57125	809216738		9		49114	797025989		9		29883	145386242
10		54195	576609462		10		45560	501732248		10		31533	147323465
		150 nM holo(H-N19D)_15 min					150 nM holo(H-N19D)_30 min					150 nM holo(H-N19D)_150 min
		DAPI (overall)	mSMC4 (overall)				DAPI (overall)	mSMC4 (overall)				DAPI (overall)	mSMC4 (overall)
Chromosome cluster					Chromosome cluster					Chromosome cluster
1		52213	688110991		1		41781	494565505		1		33553	68314606
2		41893	435416833		2		49955	612488392		2		28024	37905640
3		44904	534265904		3		57493	792138818		3		28464	32894970
4		58813	773040909		4		43623	586902825		4		25850	56393062
5		54008	696129479		5		61333	815356795		5		27422	58635062
6		52909	535057704		6		46307	537033502		6		31649	84256937
7		55703	643283344		7		47286	648511155		7		27653	67691257
8		47908	441853946		8		43919	523971334		8		27614	42275009
9		70016	804532330		9		46556	527052260		9		32484	38757664
10		62549	711521552		10		47989	644129404		10		27713	63003000
