# Supplementary material for: Cell cycle-specific loading of condensin I is regulated by the N-terminal tail of its kleisin subunit
Source: eLife. 2022 Dec 13;11:e84694. doi: 10.7554/eLife.84694 (PMC9797191; doi:10.7554/eLife.84694)
Supplement: Figure 3—source data 1. [file elife-84694-fig3-data1.xlsx]

## Sheet: Figure 3D
Figure 3-source data 1
Figure 3D
Raw DAPI area and mSMC4 intensity values
		150 nM holo(WT)_15 min					150 nM holo(WT)_30 min					150 nM holo(WT)_150 min
		DAPI (overall)	mSMC4 (overall)				DAPI (overall)	mSMC4 (overall)				DAPI (overall)	mSMC4 (overall)
Chromosome cluster					Chromosome cluster					Chromosome cluster
1		71347	84802874		1		52992	85629624		1		28515	6116911
2		70958	97517565		2		41193	75748400		2		35348	4986596
3		67995	71829452		3		49194	91791380		3		33312	35918166
4		68722	58234380		4		43879	32270378		4		42772	6554730
5		68422	18959539		5		43721	100863833		5		38223	21147433
6		60597	115763493		6		43159	90152470		6		36469	9487104
7		61778	94680439		7		49174	76228490		7		36626	1740172
8		62654	76345137		8		63435	77831486		8		35204	20485594
9		73281	61426956		9		50840	117965827		9		35425	26530672
10		62023	53587123		10		49545	79079010		10		33616	31215460
		150 nM holo(H-dN)_15 min					150 nM holo(H-dN)_30 min					150 nM holo(H-dN)_150 min
		DAPI (overall)	mSMC4 (overall)				DAPI (overall)	mSMC4 (overall)				DAPI (overall)	mSMC4 (overall)
Chromosome cluster					Chromosome cluster					Chromosome cluster
1		32901	263067518		1		47047	786072007		1		36243	130164649
2		45908	358598505		2		40668	705230028		2		32935	130459361
3		66361	688801993		3		39301	593429005		3		32265	200777208
4		46729	309951200		4		42796	868562299		4		32680	141548617
5		65938	665326453		5		44483	770414101		5		29794	124506758
6		69952	665702095		6		38183	654827097		6		30338	116799839
7		85261	762427166		7		49249	815403272		7		27733	126479650
8		70644	612054917		8		44880	798960999		8		32055	114094435
9		74347	651126313		9		40669	695705629		9		38289	138333511
10		89467	703246240		10		48974	703206663		10		39072	168178726
