# Supplementary material for: Cell cycle-specific loading of condensin I is regulated by the N-terminal tail of its kleisin subunit
Source: eLife. 2022 Dec 13;11:e84694. doi: 10.7554/eLife.84694 (PMC9797191; doi:10.7554/eLife.84694)
Supplement: Figure 4—figure supplement 1—source data 1. [file elife-84694-fig4-figsupp1-data1.xlsx]

## Sheet: Figure 4-figure supplement 1
Figure 4-figure supplement 1 source data 1
Figure 4-figure supplement 1
number of DNA
holo(WT) w/o ATP	looped DNA	total DNA		holo(H-dN) w/o ATP	looped DNA	total DNA
assay1	0	57		assay1	0	57
assay2	0	99		assay2	0	85
assay3	0	95		assay3	0	62
holo(WT) w ATP	looped DNA	total DNA		holo(H-dN) w ATP	looped DNA	total DNA
assay1	5	85		assay1	19	82
assay2	16	85		assay2	22	86
assay3	8	102		assay3	11	71
