# Supplementary material for: Cell cycle-specific loading of condensin I is regulated by the N-terminal tail of its kleisin subunit
Source: eLife. 2022 Dec 13;11:e84694. doi: 10.7554/eLife.84694 (PMC9797191; doi:10.7554/eLife.84694)
Supplement: Figure 4—source data 3. [file elife-84694-fig4-data3.xlsx]

## Sheet: Figure 4C
Figure 4-source data 3
Figure 4C
	Quantitative data of NC pUC19 from three independent experiments
	Experiment 1
		Input (1%)	Input (5%)
	Intensity	534.971	3030.46
	normalized (100%)	53497.1	60609.1
	Average (100% Input)	57053.1
		holo(WT)			holo(H-dN)
		none	ATP	AMP-PNP	none	ATP	AMP-PNP
	Intensity (NC pUC19)	91.314	426.849	137.021	47.778	2311.87	77.899
	Recovery (%)	0.160051	0.748161	0.240164	0.083743	4.05214	0.136538
	Experiment 2
		Input (1%)	Input (5%)
	Intensity	634.92	3889.23
	normalized (100%)	63492	77784.7
	Average (100% Input)	70638.3
		holo(WT)			holo(H-dN)
		none	ATP	AMP-PNP	none	ATP	AMP-PNP
	Intensity (NC pUC19)	273.799	1241.92	408.385	113.435	3258.53	348.385
	Recovery (%)	0.387607	1.75814	0.578135	0.160586	4.61297	0.493195
	Experiment 3
		Input (1%)	Input (5%)
	Intensity	540.506	3677.82
	normalized (100%)	54050.6	73556.4
	Average (100% Input)	63803.5
		holo(WT)			holo(H-dN)
		none	ATP	AMP-PNP	none	ATP	AMP-PNP
	Intensity (NC pUC19)	154.728	1070.92	301.263	103.021	3166.99	204.263
	Recovery (%)	0.242507	1.67847	0.472173	0.161466	4.96366	0.320144
