# Supplementary material for: Cell cycle-specific loading of condensin I is regulated by the N-terminal tail of its kleisin subunit
Source: eLife. 2022 Dec 13;11:e84694. doi: 10.7554/eLife.84694 (PMC9797191; doi:10.7554/eLife.84694)
Supplement: Figure 4—source data 4. [file elife-84694-fig4-data4.xlsx]

## Sheet: Figure 4D
Figure 4-source data 4
Figure 4D
number of DNA
holo(WT)	looped DNA	total DNA
assay1	12	77
assay2	12	59
assay3	6	45
holo(H-dN)	looped DNA	total DNA
assay1	44	108
assay2	26	76
assay3	14	53

## Sheet: Figure 4F-H
Figure 4-source data 4
Figure 4F, G, H
Raw DNA intensity values
holo(WT)				F	G	H			holo(H-dN)				F	G	H
		intensity		loop rate (kbp/s)	loop duration (s)	loop size (kbp)					intensity		loop rate (kbp/s)	loop duration (s)	loop size (kbp)
sample		looped DNA	entire DNA						sample		looped DNA	entire DNA
1		2087.87	2470.37	4.19053	205	40.9905			1		841.878	959.539	2.12764	1095	42.5528
2		1666.56	3605.95	1.49435	15	22.4152			2		413.155	525.737	3.81142	85	38.1142
3		2344.15	2872.4	2.6387	40	39.5806			3		1692.54	1779.33	2.30672	190	46.1344
4		886.072	1522.26	5.64613	45	28.2307			4		1426.44	1545.56	2.2381	175	44.762
5		313.65	397.8	1.52961	440	38.2404			5		1462.55	1952.07	2.4225	990	303.412
6		1797.29	2213.64	2.20481	390	39.3779			6		1293.77	1524.8	2.05757	210	41.1515
7		1105.4	1864.1	2.87602	10	28.7602			7		733.25	837.673	2.83027	390	42.4541
8		658.1	1398.06	2.02217	170	22.8301			8		1111.07	1511.38	3.56541	130	35.6541
9		2176.55	2439.62	4.327	160	43.27			9		1420.3	2025.01	2.26779	65	34.0169
10		525.158	599.635	1.69905	30	42.4761			10		637.409	791.279	1.56275	245	39.0688
11		1197.67	1515.25	3.83351	130	38.3351			11		560.183	1031.23	2.63461	110	26.3461
12		589.518	641.715	2.22775	105	44.5549			12		405.196	479.623	2.73159	315	40.9739
13		1185.66	1541.89	2.48631	335	37.2946			13		640.74	928.839	2.23045	160	33.4567
14		1981.07	2058.7	2.33356	620	46.6711			14		647.71	1262.34	2.48854	660	24.8854
15		1053.26	1681.33	3.03824	945	30.3824			15		1032.84	1297.32	2.57417	175	38.6125
16		503.133	607.865	4.01437	115	40.1437			16		763.22	884.307	4.1859	270	41.859
17		1048.82	1357.05	1.24947	45	37.4841			17		1119.47	1557.24	2.32438	1075	34.8656
18		384.794	405.304	1.31559	240	46.0458			18		901.408	1300.6	1.68069	795	33.6138
19		1732.34	2218.04	1.51519	85	37.8797			19		527.803	1066.33	2.40062	55	24.0062
20		717.203	740.109	3.13327	770	46.999			20		540.524	1056.77	2.48071	570	24.8071
21		612.655	1057.56	1.87309	20	28.0964			21		412.255	599.445	2.22365	40	33.3548
22		n.d	n.d	n.d	955	n.d			22		899.019	1310.96	2.21733	585	33.26
23		n.d	n.d	n.d	95	n.d			23		564.007	884.61	3.09225	165	30.9225
24		n.d	n.d	n.d	1075	n.d			24		658.697	694.433	3.06694	95	46.0041
25		n.d	n.d	n.d	70	n.d			25		1273.19	1680.01	2.45037	675	36.7556
26		n.d	n.d	n.d	1035	n.d			26		1087.62	1185.09	2.9674	425	44.5111
27		n.d	n.d	n.d	1115	n.d			27		415.72	489.704	2.74485	65	41.1727
									28		551.714	695.618	1.92333	165	38.4667
									29		854.733	1171.68	2.3587	70	35.3805
									30		1195.65	1573.73	3.68483	1105	36.8483
									31		927.958	1058.09	2.83567	200	42.5351
									32		709.317	805.933	2.84572	335	42.6858
									33		386.462	589.912	3.17733	305	31.7733
									34		1193.83	1482.58	1.3018	10	39.054
									35		363.843	478.032	3.69146	85	36.9146
									36		1495.5	1715.92	2.818	870	42.2701
									37		343.594	465.419	2.38699	165	35.8049
									38		737.154	1252.93	2.85348	65	28.5348
									39		324.272	462.553	6.80016	25	34.0008
									40		699.142	1022	6.63566	490	33.1783
									41		1877.27	2243.13	2.70598	155	40.5897
									42		1107.68	1203.63	1.78535	65	44.6338
									43		950.216	1405.35	1.49787	1125	32.7929
									44		917.105	1261.7	1.76268	390	35.2536
									45		272.134	315.545	4.18277	1065	41.8277
									46		1648.21	2242.48	2.37648	1125	35.6472
									47		790.735	1028.96	1.86357	90	37.2713
									48		1844.34	2836.92	2.10206	95	31.5308
									49		1925.3	2057.49	3.0256	270	45.384
									50		1432.72	1952.38	2.37273	245	35.591
									51		185.451	256.914	3.50093	165	35.0093
									52		711.068	886.495	2.59349	100	38.9024
									53		412.866	515.807	2.58805	1160	38.8207
									54		555.811	631.983	2.84362	620	42.6543
									55		846.33	1083.21	2.52626	105	37.8939
									56		379.416	630.523	1.45924	620	29.1848
									57		517.924	620.673	4.04711	360	40.4711
									58		196.888	262.997	3.63087	15	36.3087
									59		893.316	1006.72	2.86909	245	43.0364
									60		n.d	n.d	n.d	140	n.d
									61		n.d	n.d	n.d	445	n.d
									62		n.d	n.d	n.d	415	n.d
									63		n.d	n.d	n.d	85	n.d
									64		n.d	n.d	n.d	90	n.d
									65		n.d	n.d	n.d	20	n.d
									66		n.d	n.d	n.d	265	n.d
									67		n.d	n.d	n.d	100	n.d
									68		n.d	n.d	n.d	960	n.d
									69		n.d	n.d	n.d	490	n.d
									70		n.d	n.d	n.d	205	n.d
									71		n.d	n.d	n.d	50	n.d
									72		n.d	n.d	n.d	305	n.d
									73		n.d	n.d	n.d	140	n.d
									74		n.d	n.d	n.d	150	n.d
									75		n.d	n.d	n.d	640	n.d
									76		n.d	n.d	n.d	250	n.d
									77		n.d	n.d	n.d	280	n.d
									78		n.d	n.d	n.d	780	n.d
									79		n.d	n.d	n.d	50	n.d
									80		n.d	n.d	n.d	15	n.d
									81		n.d	n.d	n.d	10	n.d
