# Supplementary figures and images for: Cell cycle-specific loading of condensin I is regulated by the N-terminal tail of its kleisin subunit
Source: eLife journal article supplement (doi:10.7554/elife.84694), 2022-12-13

Figure 1-figure supplement 1-source data 1

Figure 1-figure supplement 1A and B

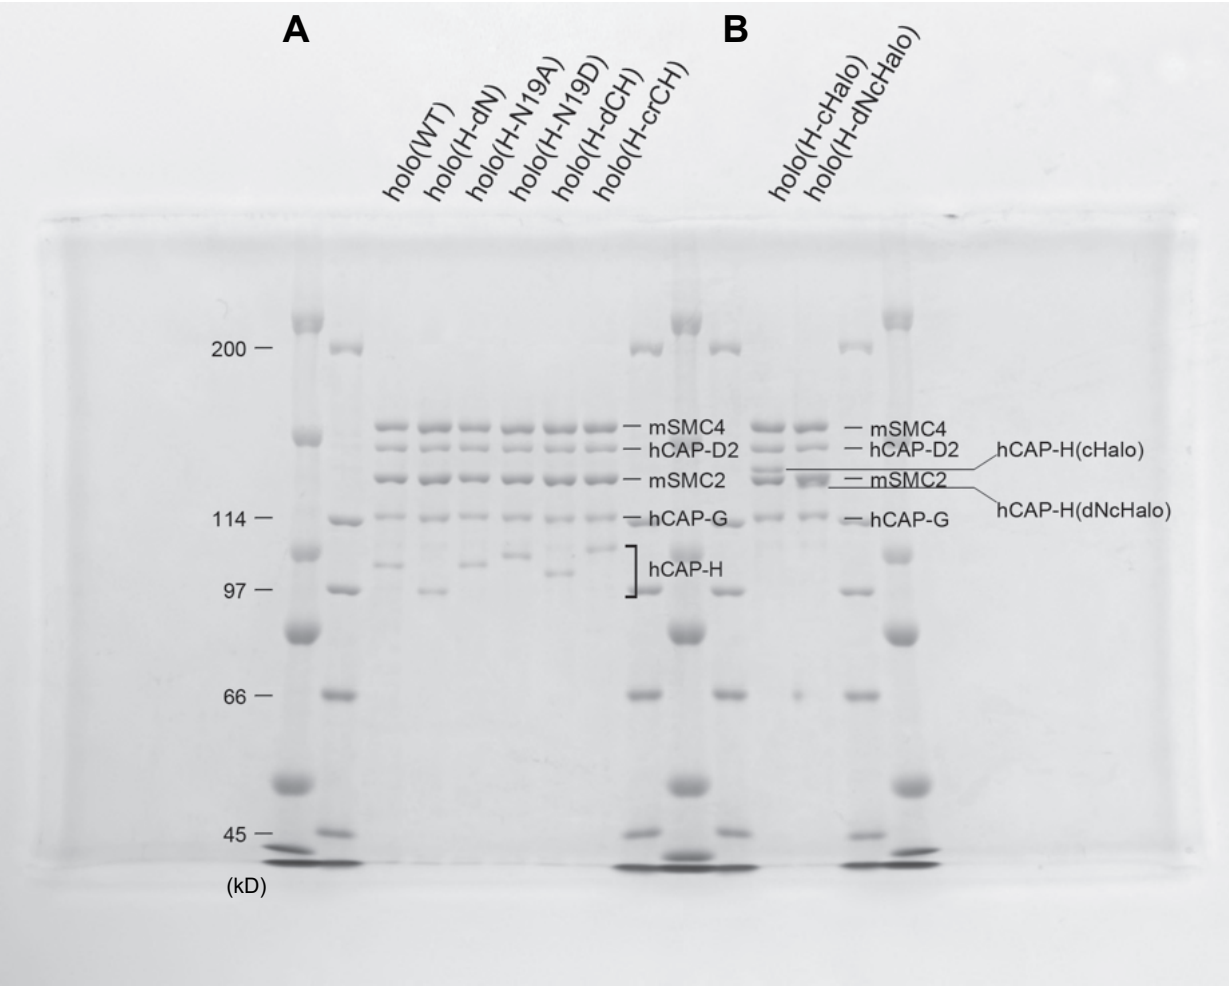

Supplement: fig1-figsupp1-data1 [file elife-84694-fig1-figsupp1-data1-v2.zip]

Figure 1-figure supplement 1-source data 3  
Figure 1-figure supplement 1C

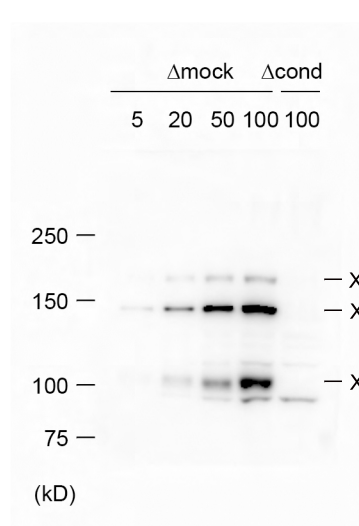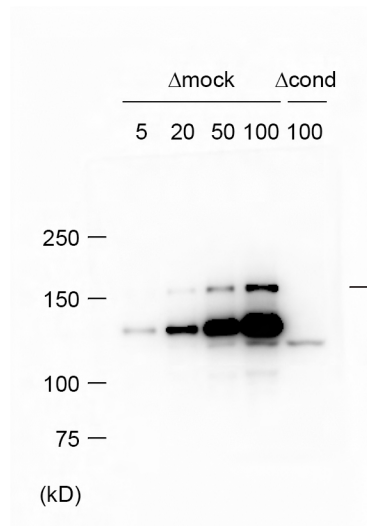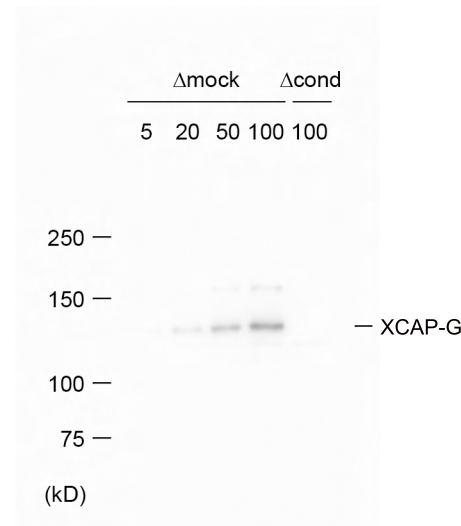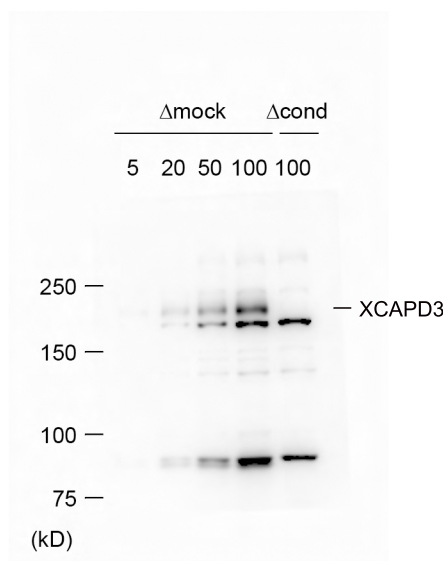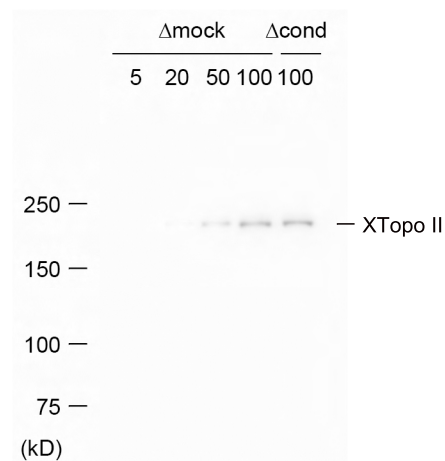

Supplement: fig1-figsupp1-data3 [file elife-84694-fig1-figsupp1-data3-v2.zip]

Figure 2-figure supplement 1-source data 1  
Figure 2-figure supplement 1B

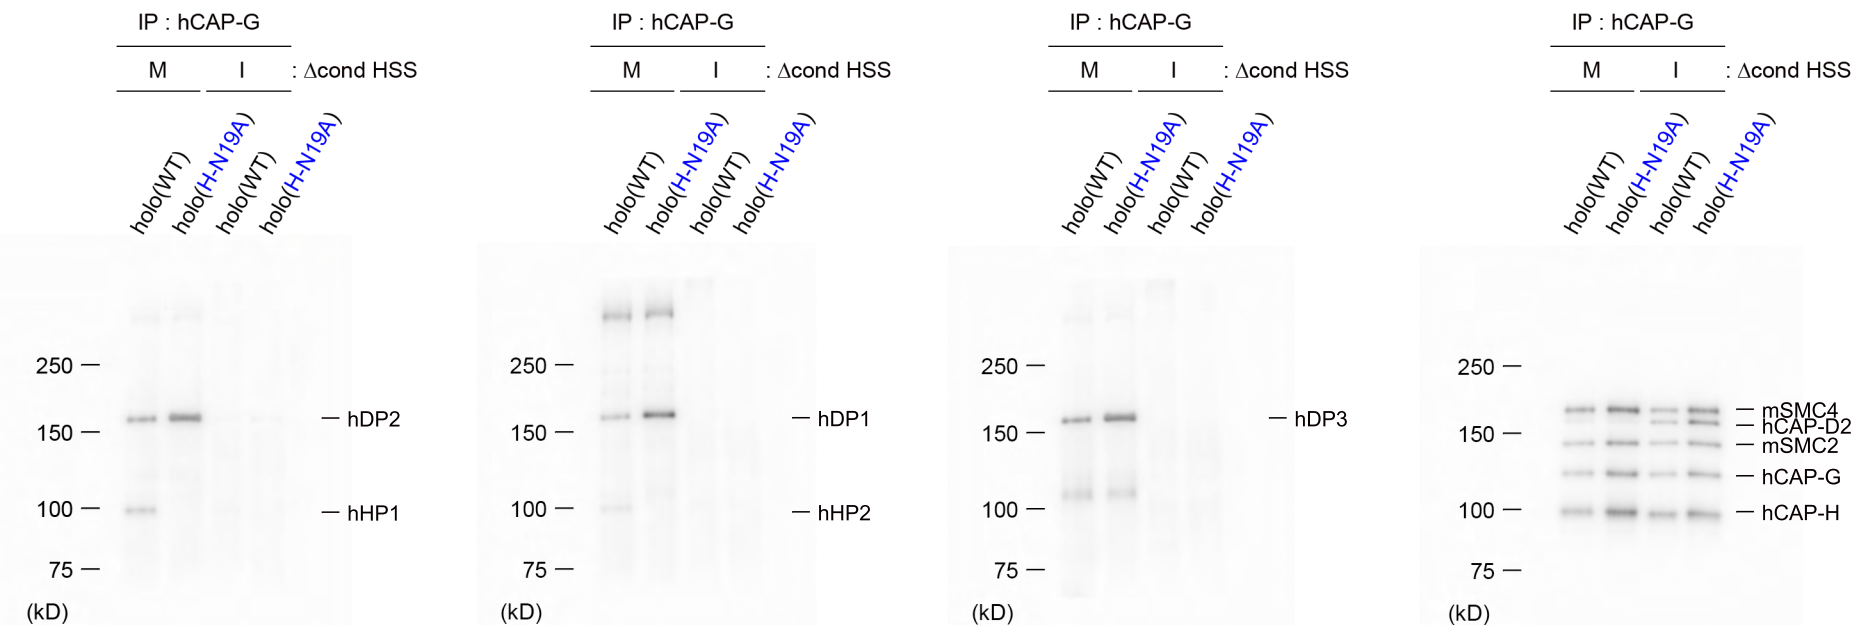

Supplement: fig2-figsupp1-data1 [file elife-84694-fig2-figsupp1-data1-v2.zip]

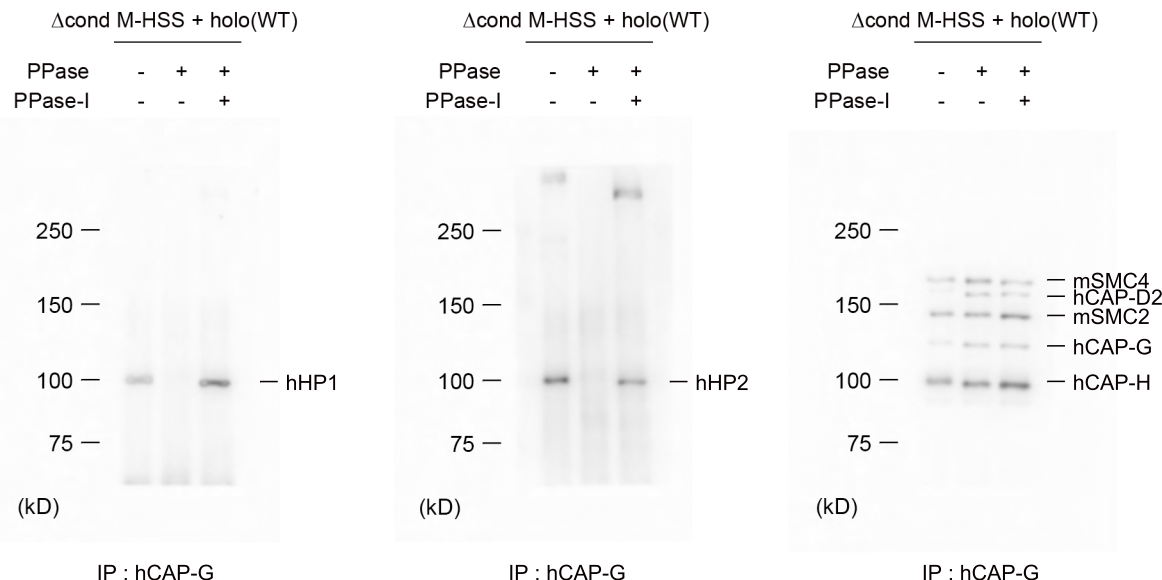

Supplement: fig2-figsupp1-data2 [file elife-84694-fig2-figsupp1-data2-v2.zip]

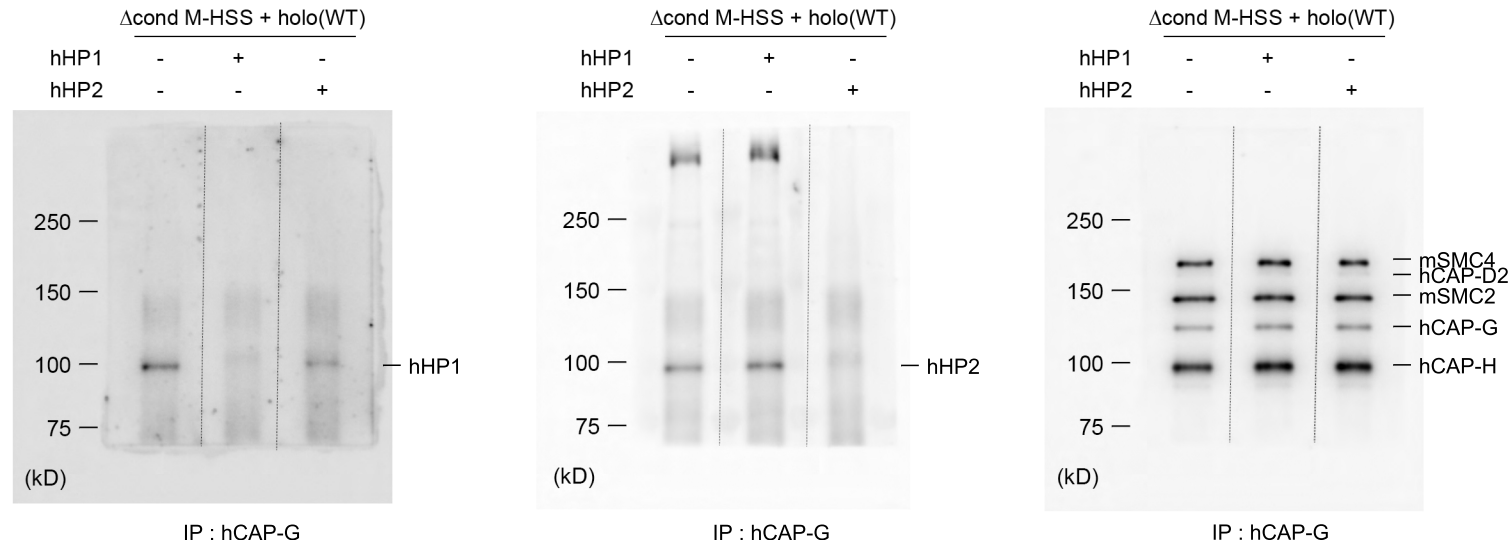

Supplement: supp [file Figure 2-figure supplement 1-source data 3.pdf › Figure 2-figure supplement 1-source data 3.pdf]

Figure 4-source data 1  
Figure 4A

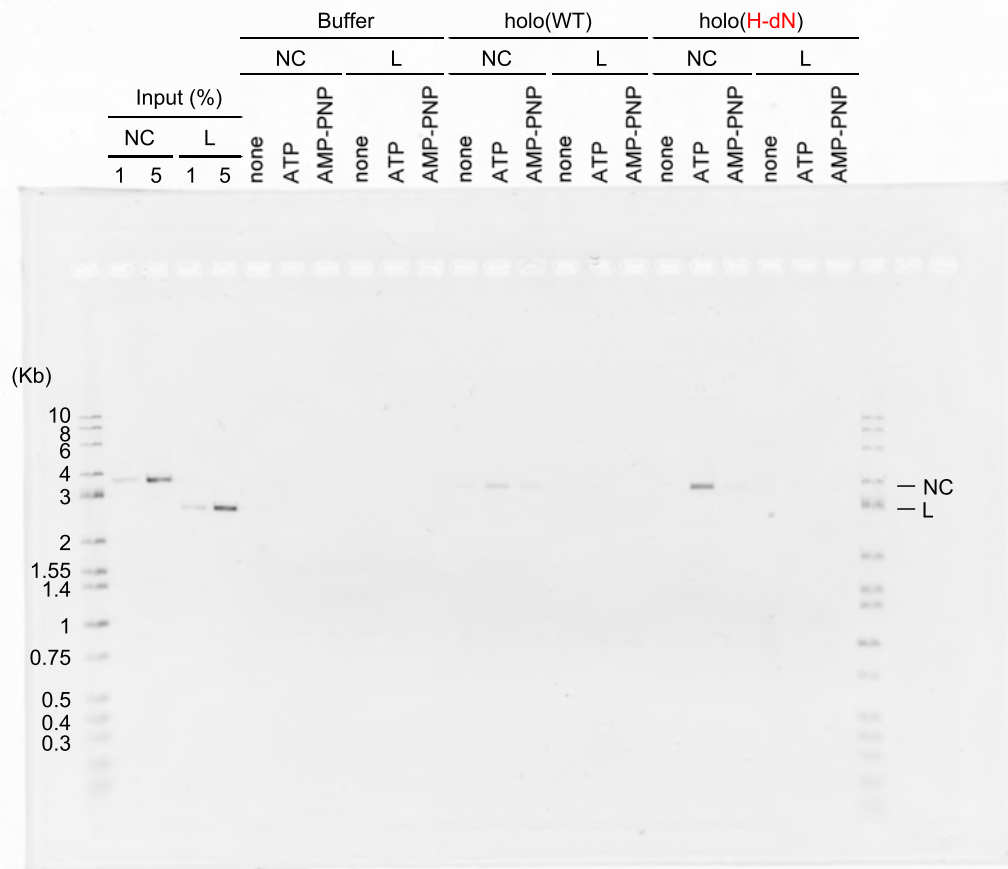

Supplement: supp [file Figure 4-source data 1.pdf › Figure 4-source data 1.pdf]

Figure 4-source data 2  
Figure 4B

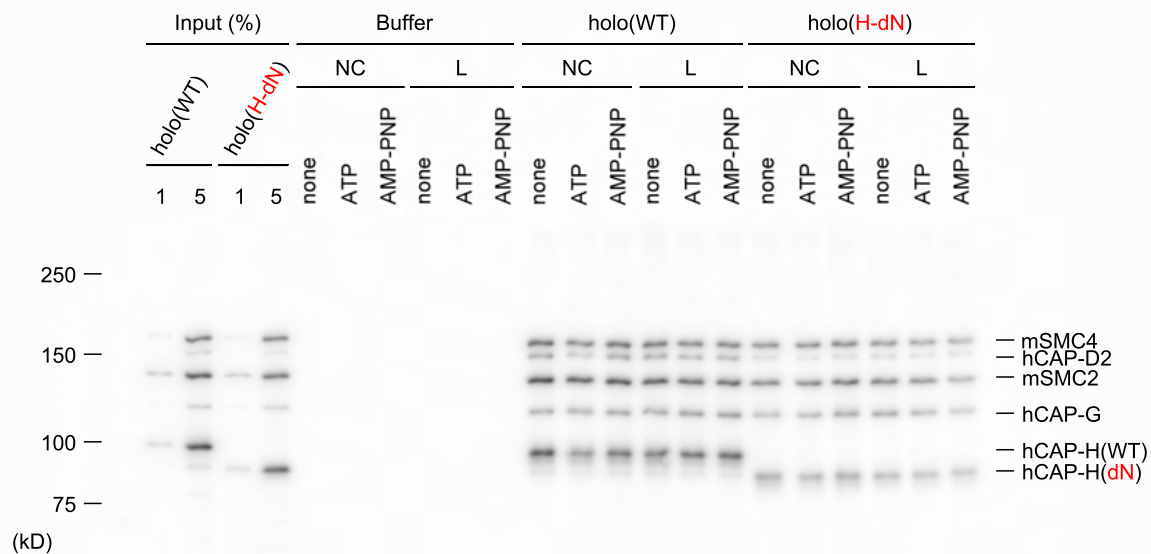

Supplement: supp [file Figure 4-source data 2.pdf › Figure 4-source data 2.pdf]
